# Supplementary material for: N-Arachidonoyl Dopamine Inhibits NRAS Neoplastic Transformation by Suppressing Its Plasma Membrane Translocation
Source: Oxford University Press journal article supplement (doi:10.1158/1535-7163.mct-16-0419), 2016-10-19
Supplement: 15357163mct160419-sup-168367_2_supp_3695071_sssgfs.xlsx [file 15357163mct160419-sup-168367_2_supp_3695071_sssgfs.xlsx]

## Sheet: DifExp
Supplementary Data Set. Unique genes differentially expressed between 1μM NADA and vehicle control treated Ba/F3-N cells.
Probe.Set.ID	Gene.Symbol	logFC	AveExpr	P.Value	adj.P.Val	Gene.Title
1419435_at	AOX1	-3.03791	7.65933	1.85233e-11	2.96734e-07	aldehyde oxidase 1
1425065_at	OAS2	-3.23676	8.666	1.91158e-11	2.96734e-07	2'-5' oligoadenylate synthetase 2
1426063_a_at	GEM	3.78712	7.71053	1.9738e-11	2.96734e-07	GTP binding protein (gene overexpressed in skeletal muscle)
1416926_at	TRP53INP1	-3.02287	9.6403	3.94983e-11	3.67583e-07	transformation related protein 53 inducible nuclear protein 1
1443698_at	FBXO39	-3.02989	8.91861	4.07511e-11	3.67583e-07	F-box protein 39
1453196_a_at	OASL2	-4.08565	5.48377	5.35869e-11	4.02804e-07	2'-5' oligoadenylate synthetase-like 2
1417689_a_at	PDZK1IP1	-2.47614	10.0501	7.42202e-11	4.52346e-07	PDZK1 interacting protein 1
1453238_s_at	3930401B19RIK /// 1200016E24RIK /// A130040M12RIK /// E430024C06RIK	-2.51117	9.30057	8.24868e-11	4.52346e-07	RIKEN cDNA 3930401B19 gene /// RIKEN cDNA 1200016E24 gene /// RIKEN cDNA A130040M12 gene /// RIKEN cDNA E430024C06 gene
1418217_at	NME7	-2.70194	8.52605	9.13544e-11	4.52346e-07	non-metastatic cells 7, protein expressed in
1449009_at	TGTP	-2.66562	7.70708	1.15075e-10	4.52346e-07	T-cell specific GTPase
1438519_at	KLHL24	-2.63563	7.26524	1.24054e-10	4.52346e-07	kelch-like 24 (Drosophila)
1441937_s_at	PINK1	-2.81604	5.38847	1.46465e-10	4.52346e-07	PTEN induced putative kinase 1
1435137_s_at	1200015M12RIK /// 1200016E24RIK /// A130040M12RIK /// E430024C06RIK	-2.62177	10.0039	1.55026e-10	4.52346e-07	RIKEN cDNA 1200015M12 gene /// RIKEN cDNA 1200016E24 gene /// RIKEN cDNA A130040M12 gene /// RIKEN cDNA E430024C06 gene
1437232_at	BPIL2	-2.98815	6.37486	1.67895e-10	4.52346e-07	bactericidal/permeability-increasing protein-like 2
1437584_at	CCND3	-2.53414	7.34816	1.86194e-10	4.52346e-07	Cyclin D3
1428869_at	NOLC1	2.35617	9.84195	1.90994e-10	4.52346e-07	nucleolar and coiled-body phosphoprotein 1
1417516_at	DDIT3	-2.59764	8.96113	2.21322e-10	4.52346e-07	DNA-damage inducible transcript 3
1428870_at	NOLC1	2.40767	7.09286	2.32455e-10	4.52346e-07	nucleolar and coiled-body phosphoprotein 1
1455477_s_at	PDZK1IP1	-2.39664	10.523	2.38823e-10	4.52346e-07	PDZK1 interacting protein 1
1416022_at	FABP5	2.21515	8.44955	2.39665e-10	4.52346e-07	fatty acid binding protein 5, epidermal
1436172_at	9530028C05	-2.31816	7.99016	2.46814e-10	4.52346e-07	hypothetical protein 9530028C05
1450957_a_at	SQSTM1	-2.4076	10.8573	2.57773e-10	4.52346e-07	sequestosome 1
1452757_s_at	HBA-A1	-2.39293	8.58546	2.6128e-10	4.52346e-07	hemoglobin alpha, adult chain 1
1427932_s_at	1200003I10RIK /// 1200015M12RIK /// 1200016E24RIK /// A130040M12RIK /// E430024C06RIK	-2.35278	11.0907	2.61334e-10	4.52346e-07	RIKEN cDNA 1200003I10 gene /// RIKEN cDNA 1200015M12 gene /// RIKEN cDNA 1200016E24 gene /// RIKEN cDNA A130040M12 gene /// RIKEN cDNA E430024C06 gene
1436562_at	DDX58	-2.38173	8.74903	2.68802e-10	4.52346e-07	DEAD (Asp-Glu-Ala-Asp) box polypeptide 58
1417714_x_at	HBA-A1	-2.35882	7.47367	2.80319e-10	4.52346e-07	hemoglobin alpha, adult chain 1
1417793_at	IIGP2	-2.55065	6.49689	2.87536e-10	4.52346e-07	interferon inducible GTPase 2
1419518_at	TUBA8	2.38807	9.57799	2.91841e-10	4.52346e-07	tubulin, alpha 8
1428332_at	1500004A08RIK	-3.20347	7.75495	2.99928e-10	4.52346e-07	RIKEN cDNA 1500004A08 gene
1454646_at	TCP11L2	-2.89929	7.78748	3.02214e-10	4.52346e-07	t-complex 11 (mouse) like 2
1451345_at	MTAP	2.2423	9.26954	3.10918e-10	4.52346e-07	methylthioadenosine phosphorylase
1426624_a_at	YPEL3	-2.53662	8.99052	3.58366e-10	4.72142e-07	yippee-like 3 (Drosophila)
1418191_at	USP18	-2.13278	8.08496	3.91325e-10	4.72142e-07	ubiquitin specific peptidase 18
1426972_at	SEC24D	-2.19526	9.7301	3.91799e-10	4.72142e-07	SEC24 related gene family, member D (S. cerevisiae)
1426065_a_at	TRIB3	-2.16827	8.14702	3.92557e-10	4.72142e-07	tribbles homolog 3 (Drosophila)
1437033_a_at	SKP2	2.13088	7.86657	4.11915e-10	4.72142e-07	S-phase kinase-associated protein 2 (p45)
1451196_at	YPEL5	-2.26395	8.83515	4.16307e-10	4.72142e-07	yippee-like 5 (Drosophila)
1426534_a_at	ARFGAP3	-2.2274	8.30185	4.17615e-10	4.72142e-07	ADP-ribosylation factor GTPase activating protein 3
1448226_at	RRM2	2.01735	9.38376	4.22976e-10	4.72142e-07	ribonucleotide reductase M2
1424354_at	1110007F12RIK	-4.29249	6.74376	4.23246e-10	4.72142e-07	RIKEN cDNA 1110007F12 gene
1449360_at	CSF2RB2	-2.31144	10.599	4.2921e-10	4.72142e-07	colony stimulating factor 2 receptor, beta 2, low-affinity (granulocyte-macrophage)
1460361_at	5033414D02RIK	-2.06374	9.05284	4.45302e-10	4.77814e-07	RIKEN cDNA 5033414D02 gene
1428651_at	KLHL24	-2.60693	8.49306	4.67735e-10	4.77814e-07	kelch-like 24 (Drosophila)
1438971_x_at	UBE2H	-2.29115	7.42629	4.69155e-10	4.77814e-07	ubiquitin-conjugating enzyme E2H
1424110_a_at	NME1	1.98714	9.99976	5.01552e-10	4.77814e-07	expressed in non-metastatic cells 1, protein
1429351_at	KLHL24	-2.56594	8.95994	5.04754e-10	4.77814e-07	kelch-like 24 (Drosophila)
1456890_at	DDX58	-2.72767	6.16556	5.07342e-10	4.77814e-07	DEAD (Asp-Glu-Ala-Asp) box polypeptide 58
1416488_at	CCNG2	-2.17937	8.96119	5.10067e-10	4.77814e-07	cyclin G2
1415810_at	UHRF1	1.95994	10.3938	5.19121e-10	4.77814e-07	ubiquitin-like, containing PHD and RING finger domains, 1
1438201_at	PPM2C	2.18273	7.404	5.39516e-10	4.78197e-07	protein phosphatase 2C, magnesium dependent, catalytic subunit
1422662_at	LGALS8	-2.04978	9.8028	5.40743e-10	4.78197e-07	lectin, galactose binding, soluble 8
1416346_at	TIMM8A1	2.35372	8.6415	5.5883e-10	4.80254e-07	translocase of inner mitochondrial membrane 8 homolog a1 (yeast)
1427918_a_at	RHOQ	-1.93102	10.4902	5.8025e-10	4.80254e-07	ras homolog gene family, member Q
1434151_at	METTL7A	-2.33752	10.0146	5.89028e-10	4.80254e-07	methyltransferase like 7A
1416283_at	GART	2.03002	8.44858	6.02897e-10	4.80254e-07	phosphoribosylglycinamide formyltransferase
1421840_at	ABCA1	-2.4369	9.84771	6.12655e-10	4.80254e-07	ATP-binding cassette, sub-family A (ABC1), member 1
1428485_at	CAR12	1.99506	6.84512	6.16991e-10	4.80254e-07	carbonic anyhydrase 12
1444517_at	---	-2.19603	7.49029	6.2732e-10	4.80254e-07	---
1418884_x_at	TUBA1	-2.08195	10.0362	6.28257e-10	4.80254e-07	tubulin, alpha 1
1460603_at	SAMD9L	-2.25122	9.72843	6.41668e-10	4.82331e-07	sterile alpha motif domain containing 9-like
1435866_s_at	HIST3H2A	-2.08703	7.19505	6.54847e-10	4.83844e-07	histone 3, H2a
1451860_a_at	TRIM30	-1.9498	9.13491	6.65137e-10	4.83844e-07	tripartite motif protein 30
1425179_at	SHMT1	2.07285	8.13101	7.00876e-10	4.90164e-07	serine hydroxymethyl transferase 1 (soluble)
1435544_at	EXOSC6	1.84397	8.99297	7.1163e-10	4.90164e-07	exosome component 6
1426486_at	UBXD2	-1.83094	10.7691	7.29742e-10	4.90164e-07	UBX domain containing 2
1422547_at	RANBP1	2.04237	11.4558	7.3493e-10	4.90164e-07	RAN binding protein 1
1415811_at	UHRF1	2.08216	7.71765	7.36e-10	4.90164e-07	ubiquitin-like, containing PHD and RING finger domains, 1
1439755_at	---	-2.16927	8.42296	7.39033e-10	4.90164e-07	---
1444583_at	D4ERTD767E	1.95819	7.57596	7.58329e-10	4.90357e-07	DNA segment, Chr 4, ERATO Doi 767, expressed
1426093_at	TRIM34	-2.12832	6.61168	7.72458e-10	4.90357e-07	tripartite motif protein 34
1454858_x_at	METTL7A	-2.35485	9.98892	7.81842e-10	4.90357e-07	methyltransferase like 7A
1452118_at	2600005C20RIK	1.9232	8.67946	7.98494e-10	4.90357e-07	RIKEN cDNA 2600005C20 gene
1456480_at	FRY	2.45216	7.51354	8.00933e-10	4.90357e-07	furry homolog (Drosophila)
1416298_at	MMP9	2.84567	7.84086	8.04559e-10	4.90357e-07	matrix metallopeptidase 9
1435333_at	1110007M04RIK	1.96046	7.9284	8.5546e-10	5.07549e-07	RIKEN cDNA 1110007M04 gene
1452830_s_at	CAD	2.00939	8.59982	8.58537e-10	5.07549e-07	carbamoyl-phosphate synthetase 2, aspartate transcarbamylase, and dihydroorotase
1451564_at	PARP14	-2.29362	7.41651	8.89457e-10	5.07549e-07	poly (ADP-ribose) polymerase family, member 14
1437598_at	ZBTB20	-2.13984	6.66828	9.08947e-10	5.07549e-07	zinc finger and BTB domain containing 20
1426533_at	NOL5A	1.88843	10.0021	9.18556e-10	5.07549e-07	nucleolar protein 5A
1434944_at	DMPK	2.19113	8.1243	9.44989e-10	5.07549e-07	dystrophia myotonica-protein kinase
1416042_s_at	NASP	1.83298	9.53048	9.55923e-10	5.07549e-07	nuclear autoantigenic sperm protein (histone-binding)
1424426_at	MTAP	2.13487	9.14782	9.65539e-10	5.07549e-07	methylthioadenosine phosphorylase
1416101_a_at	HIST1H1C	-2.22085	11.3314	9.81146e-10	5.07549e-07	histone 1, H1c
1426221_at	LOH11CR2A	-1.97297	9.9212	9.83146e-10	5.07549e-07	loss of heterozygosity, 11, chromosomal region 2, gene A homolog (human)
1417511_at	LYAR	1.84491	9.96182	1.01718e-09	5.07549e-07	Ly1 antibody reactive clone
1456225_x_at	TRIB3	-2.31049	8.81854	1.0488e-09	5.07549e-07	tribbles homolog 3 (Drosophila)
1416345_at	TIMM8A1	2.06737	10.3867	1.05705e-09	5.07549e-07	translocase of inner mitochondrial membrane 8 homolog a1 (yeast)
1446096_at	2310001H17RIK	-1.9977	7.17877	1.05957e-09	5.07549e-07	RIKEN cDNA 2310001H17 gene
1440925_at	RHOQ	-2.56067	7.70719	1.0606e-09	5.07549e-07	Ras homolog gene family, member Q
1417936_at	CCL9	-2.02537	9.3298	1.06207e-09	5.07549e-07	chemokine (C-C motif) ligand 9
1436602_x_at	CACNA1B	-2.55557	4.41081	1.06563e-09	5.07549e-07	calcium channel, voltage-dependent, N type, alpha 1B subunit
1421326_at	---	-1.77956	8.8498	1.06721e-09	5.07549e-07	---
1427035_at	SLC39A14	2.31578	8.69772	1.07867e-09	5.07549e-07	solute carrier family 39 (zinc transporter), member 14
1434557_at	HIP1	2.55918	7.04885	1.08039e-09	5.07549e-07	huntingtin interacting protein 1
1424775_at	OAS1A	-1.88078	10.2127	1.0848e-09	5.07549e-07	2'-5' oligoadenylate synthetase 1A
1448185_at	HERPUD1	-2.01912	9.84844	1.08681e-09	5.07549e-07	homocysteine-inducible, endoplasmic reticulum stress-inducible, ubiquitin-like domain member 1
1442058_s_at	PSMC3IP	2.02195	7.14964	1.0916e-09	5.07549e-07	proteasome (prosome, macropain) 26S subunit, ATPase 3, interacting protein
1423686_a_at	PRR13	-1.84862	11.4558	1.12356e-09	5.17077e-07	proline rich 13
1426604_at	RNASEL	-1.79327	9.59041	1.14054e-09	5.1959e-07	ribonuclease L (2', 5'-oligoisoadenylate synthetase-dependent)
1433486_at	CLCN3	-2.30466	6.59054	1.15787e-09	5.22209e-07	chloride channel 3
1418840_at	PDCD4 /// LOC670861	-1.73149	10.9305	1.23219e-09	5.43357e-07	programmed cell death 4 /// similar to programmed cell death 4
1451361_a_at	BC027342	-2.15195	8.87987	1.26817e-09	5.43357e-07	cDNA sequence BC027342
1446771_at	---	2.30613	7.69613	1.2719e-09	5.43357e-07	---
1437542_at	A730095J18RIK	-1.71598	11.2289	1.27524e-09	5.43357e-07	RIKEN cDNA A730095J18 gene
1417961_a_at	TRIM30	-2.02233	8.86533	1.29542e-09	5.43357e-07	tripartite motif protein 30
1421322_a_at	ISGF3G	-2.34344	7.98276	1.30139e-09	5.43357e-07	interferon dependent positive acting transcription factor 3 gamma
1436520_at	AI450948	-2.64442	7.05377	1.31113e-09	5.43357e-07	expressed sequence AI450948
1435792_at	CSPRS /// LOC665338	-3.25028	5.80013	1.31217e-09	5.43357e-07	component of Sp100-rs /// similar to component of Sp100-rs
1419014_at	RHAG	-3.69044	5.94921	1.31778e-09	5.43357e-07	Rhesus blood group-associated A glycoprotein
1438015_at	BC068171	1.77308	10.2762	1.32523e-09	5.43357e-07	cDNA sequence BC068171
1428562_at	2210403K04RIK	-2.57977	8.07605	1.34605e-09	5.46919e-07	RIKEN cDNA 2210403K04 gene
1426612_at	TIPIN	1.78749	10.3296	1.37702e-09	5.54508e-07	timeless interacting protein
1420477_at	NAP1L1	1.66375	9.49936	1.40946e-09	5.62549e-07	nucleosome assembly protein 1-like 1
1453072_at	GPR160	-2.14655	6.87379	1.47632e-09	5.80345e-07	G protein-coupled receptor 160
1429173_at	DNASE1L1	-1.73893	8.80761	1.48359e-09	5.80345e-07	deoxyribonuclease 1-like 1
1416021_a_at	FABP5 /// LOC628298 /// LOC637129 /// LOC669559 /// LOC672321	1.95582	9.92231	1.49265e-09	5.80345e-07	fatty acid binding protein 5, epidermal /// similar to Fatty acid-binding protein, epidermal (E-FABP) (Psoriasis-associated fatty acid-binding protein homolog) (PA-FABP) (Keratinocyte lipid-binding protein) /// similar to Fatty acid-binding protein, epidermal (E-FABP) (Psoriasis-associated fatty acid-binding protein homolog) (PA-FABP) (Keratinocyte lipid-binding protein) /// similar to Fatty acid…
1455660_at	---	-1.79587	10.9008	1.5154e-09	5.84153e-07	---
1452210_at	DNA2L	1.7549	9.06381	1.55482e-09	5.90428e-07	DNA2 DNA replication helicase 2-like (yeast)
1434239_at	AA408556	2.52468	7.17121	1.55786e-09	5.90428e-07	expressed sequence AA408556
1438160_x_at	SLCO4A1	1.99522	8.38404	1.57775e-09	5.92357e-07	solute carrier organic anion transporter family, member 4a1
1448710_at	CXCR4	-2.44934	8.69341	1.60519e-09	5.92357e-07	chemokine (C-X-C motif) receptor 4
1447448_s_at	KLF6	-1.98057	8.94219	1.60835e-09	5.92357e-07	Kruppel-like factor 6
1441272_at	MATR3	1.96379	8.30382	1.6263e-09	5.92357e-07	Matrin 3
1417191_at	DNAJB9	-1.69511	9.5791	1.63165e-09	5.92357e-07	DnaJ (Hsp40) homolog, subfamily B, member 9
1421260_a_at	SRM	2.36992	9.36147	1.64175e-09	5.92357e-07	spermidine synthase
1457434_s_at	PTPLA	1.75341	8.72332	1.66724e-09	5.96778e-07	protein tyrosine phosphatase-like (proline instead of catalytic arginine), member a
1434437_x_at	RRM2	1.74908	10.9759	1.70823e-09	6.01241e-07	ribonucleotide reductase M2
1415916_a_at	MTHFD1	1.66398	9.92036	1.74014e-09	6.01241e-07	methylenetetrahydrofolate dehydrogenase (NADP+ dependent), methenyltetrahydrofolate cyclohydrolase, formyltetrahydrofolate synthase
1427347_s_at	TUBB2A /// TUBB2B /// LOC665524 /// LOC671656	-1.66182	8.00043	1.74904e-09	6.01241e-07	tubulin, beta 2a /// tubulin, beta 2b /// similar to tubulin, beta 3 /// similar to tubulin, beta 3
1452996_a_at	AVEN	1.77156	7.01574	1.7544e-09	6.01241e-07	apoptosis, caspase activation inhibitor
1437109_s_at	LSM6	1.61638	9.91312	1.75666e-09	6.01241e-07	LSM6 homolog, U6 small nuclear RNA associated (S. cerevisiae)
1444057_at	---	-1.7141	8.55518	1.75969e-09	6.01241e-07	Transcribed locus
1416850_s_at	D10ERTD214E	1.64847	10.6329	1.78421e-09	6.05036e-07	DNA segment, Chr 10, ERATO Doi 214, expressed
1448239_at	HMOX1	-2.27598	7.96994	1.80293e-09	6.05867e-07	heme oxygenase (decycling) 1
1450087_a_at	NOLC1	2.46057	8.9288	1.81353e-09	6.05867e-07	nucleolar and coiled-body phosphoprotein 1
1451177_at	DNAJB4	-2.12179	9.5328	1.86695e-09	6.19127e-07	DnaJ (Hsp40) homolog, subfamily B, member 4
1416120_at	RRM2	2.21249	8.32267	1.9172e-09	6.27148e-07	ribonucleotide reductase M2
1418969_at	SKP2	1.9987	8.42091	1.93146e-09	6.27148e-07	S-phase kinase-associated protein 2 (p45)
1428909_at	A130040M12RIK	-1.65587	7.70045	1.93285e-09	6.27148e-07	RIKEN cDNA A130040M12 gene
1439259_x_at	ABHD4	-1.64791	11.4457	1.96869e-09	6.30652e-07	abhydrolase domain containing 4
1435621_at	MLSTD1	-2.04493	6.06737	1.97162e-09	6.30652e-07	male sterility domain containing 1
1452915_at	PRKAR2A	1.69761	9.25074	2.00114e-09	6.31959e-07	protein kinase, cAMP dependent regulatory, type II alpha
1441141_at	C730024G19RIK	-1.7324	7.12502	2.00373e-09	6.31959e-07	RIKEN cDNA C730024G19 gene
1457549_at	CCND3	-2.04657	6.42709	2.02875e-09	6.32867e-07	Cyclin D3
1448568_a_at	SLC20A1	1.66218	10.0876	2.03467e-09	6.32867e-07	solute carrier family 20, member 1
1432016_a_at	IDH3A	1.86565	10.175	2.06754e-09	6.34268e-07	isocitrate dehydrogenase 3 (NAD+) alpha
1448126_at	FAM60A	1.73161	8.6001	2.07344e-09	6.34268e-07	family with sequence similarity 60, member A
1434357_a_at	KPNB1	2.05508	6.42546	2.08467e-09	6.34268e-07	karyopherin (importin) beta 1
1419665_a_at	NUPR1	-1.86225	6.94895	2.12883e-09	6.34268e-07	nuclear protein 1
1435313_at	CD200R4	-2.11183	7.19526	2.1575e-09	6.34268e-07	Cd200 receptor 4
1425525_a_at	P2RX4	-1.62417	9.3911	2.16189e-09	6.34268e-07	purinergic receptor P2X, ligand-gated ion channel 4
1438366_x_at	CLCN3	-2.17814	8.05347	2.17593e-09	6.34268e-07	chloride channel 3
1452418_at	1200016E24RIK	-1.97272	8.95419	2.19119e-09	6.34268e-07	RIKEN cDNA 1200016E24 gene
1455496_at	PFAS	2.00129	8.80505	2.19196e-09	6.34268e-07	phosphoribosylformylglycinamidine synthase (FGAR amidotransferase)
1453380_a_at	XRCC6BP1	1.72813	7.44341	2.21216e-09	6.34268e-07	XRCC6 binding protein 1
1456393_at	2310002J21RIK	-1.68486	9.21641	2.21615e-09	6.34268e-07	RIKEN cDNA 2310002J21 gene
1452048_at	MRPL12	1.73435	9.68046	2.22896e-09	6.34268e-07	mitochondrial ribosomal protein L12
1426381_at	PPRC1	1.67429	8.08772	2.22981e-09	6.34268e-07	peroxisome proliferative activated receptor, gamma, coactivator-related 1
1456510_x_at	HIGD1C	-2.09541	7.24342	2.23606e-09	6.34268e-07	HIG1 domain family, member 1C
1417890_at	PDXP	1.80055	6.82157	2.25289e-09	6.35048e-07	pyridoxal (pyridoxine, vitamin B6) phosphatase
1446567_at	CCND3	-1.93484	6.26558	2.36563e-09	6.62684e-07	Cyclin D3
1416315_at	ABHD4	-1.73068	8.96661	2.48341e-09	6.82654e-07	abhydrolase domain containing 4
1436329_at	EGR3	2.58426	5.94039	2.49148e-09	6.82654e-07	early growth response 3
1426783_at	GCN5L2	1.63514	8.19334	2.50148e-09	6.82654e-07	GCN5 general control of amino acid synthesis-like 2 (yeast)
1460251_at	FAS	-2.30938	6.22934	2.50579e-09	6.82654e-07	Fas (TNF receptor superfamily member)
1416124_at	CCND2	1.78877	6.33046	2.52231e-09	6.82654e-07	cyclin D2
1421525_a_at	BIRC1E	-1.59465	8.38699	2.5404e-09	6.82654e-07	baculoviral IAP repeat-containing 1e
1415911_at	IMPACT	-1.73929	9.29744	2.54287e-09	6.82654e-07	imprinted and ancient
1425753_a_at	UNG	2.55176	7.65888	2.59605e-09	6.89182e-07	uracil DNA glycosylase
1428542_at	2010003J03RIK	1.74583	9.50114	2.59775e-09	6.89182e-07	RIKEN cDNA 2010003J03 gene
1444177_at	---	-2.38286	9.56788	2.6627e-09	7.02284e-07	PREDICTED: Mus musculus hypothetical protein LOC626058 (LOC626058), mRNA
1426002_a_at	CDC7	1.63409	8.40589	2.68742e-09	7.04681e-07	cell division cycle 7 (S. cerevisiae)
1421731_a_at	FEN1	1.5825	10.0797	2.76347e-09	7.14339e-07	flap structure specific endonuclease 1
1431054_at	LSM6	1.67989	9.1893	2.76679e-09	7.14339e-07	LSM6 homolog, U6 small nuclear RNA associated (S. cerevisiae)
1435665_at	AI451617	-1.7446	7.1335	2.77176e-09	7.14339e-07	expressed sequence AI451617
1456494_a_at	TRIM30 /// AI451617	-1.95245	6.89721	2.81167e-09	7.19262e-07	tripartite motif protein 30 /// expressed sequence AI451617
1425271_at	PSMC3IP	1.83309	7.39487	2.82534e-09	7.19262e-07	proteasome (prosome, macropain) 26S subunit, ATPase 3, interacting protein
1456117_at	2600005C20RIK	2.01564	9.03188	2.89991e-09	7.19262e-07	RIKEN cDNA 2600005C20 gene
1428543_at	PPAT	2.11618	8.08867	2.9014e-09	7.19262e-07	phosphoribosyl pyrophosphate amidotransferase
1430345_at	5530402H23RIK	-1.75595	5.69923	2.92118e-09	7.19262e-07	RIKEN cDNA 5530402H23 gene
1425398_at	HIST1H2BC /// LOC665596 /// LOC665622 /// LOC671645	-2.32748	6.63753	2.98611e-09	7.19262e-07	histone 1, H2bc /// similar to Histone H2B F (H2B 291A) /// similar to Histone H2B F (H2B 291A) /// similar to Histone H2B F (H2B 291A)
1423828_at	FASN	1.58684	9.01309	3.00589e-09	7.19262e-07	fatty acid synthase
1421937_at	DAPP1	-1.72081	8.71434	3.01287e-09	7.19262e-07	dual adaptor for phosphotyrosine and 3-phosphoinositides 1
1434232_a_at	2610030H06RIK	1.50978	7.06977	3.02278e-09	7.19262e-07	RIKEN cDNA 2610030H06 gene
1444100_at	PDPN	-1.89467	7.34517	3.03397e-09	7.19262e-07	podoplanin
1419569_a_at	ISG20	-4.00159	7.98749	3.03424e-09	7.19262e-07	interferon-stimulated protein
1420540_a_at	RIT1	-1.65401	8.55852	3.05178e-09	7.19262e-07	Ras-like without CAAX 1
1452829_at	CAD	2.0347	8.39723	3.05341e-09	7.19262e-07	carbamoyl-phosphate synthetase 2, aspartate transcarbamylase, and dihydroorotase
1427100_at	METRN	1.58594	8.60714	3.07172e-09	7.19262e-07	meteorin, glial cell differentiation regulator
1436199_at	---	-1.7046	7.95671	3.09662e-09	7.19262e-07	---
1428069_at	CDCA7	1.67839	9.17655	3.11921e-09	7.19262e-07	cell division cycle associated 7
1434378_a_at	MXD4	-1.93027	7.80009	3.13667e-09	7.19262e-07	Max dimerization protein 4
1417951_at	ENO3	1.84617	8.33982	3.14867e-09	7.19262e-07	enolase 3, beta muscle
1419172_at	DHFR	1.58798	8.80566	3.15224e-09	7.19262e-07	dihydrofolate reductase
1420502_at	SAT1	-1.71548	11.0384	3.16706e-09	7.19262e-07	spermidine/spermine N1-acetyl transferase 1
1428797_at	0610039J04RIK	1.73928	7.40876	3.18213e-09	7.19262e-07	RIKEN cDNA 0610039J04 gene
1416376_at	TMEM97	1.89633	7.33219	3.19133e-09	7.19262e-07	transmembrane protein 97
1425182_x_at	KLK1B22 /// KLK1B9	-1.85656	6.69484	3.21451e-09	7.19262e-07	kallikrein 1-related peptidase b22 /// kallikrein 1-related peptidase b9
1416492_at	CCNE1	2.51924	7.8304	3.22949e-09	7.19262e-07	cyclin E1
1440169_x_at	IFNAR2	-2.08565	9.50666	3.23618e-09	7.19262e-07	interferon (alpha and beta) receptor 2
1423264_at	BOP1	1.60002	8.2452	3.24003e-09	7.19262e-07	block of proliferation 1
1444350_at	LOC672855	-2.1169	6.38316	3.24342e-09	7.19262e-07	similar to schlafen 10
1430139_at	HELLS	1.94133	8.56381	3.25001e-09	7.19262e-07	helicase, lymphoid specific
1446860_at	GAB2	-1.73877	8.48553	3.26508e-09	7.19262e-07	Growth factor receptor bound protein 2-associated protein 2
1451346_at	MTAP	2.00817	9.90386	3.27028e-09	7.19262e-07	methylthioadenosine phosphorylase
1449556_at	H2-T23 /// C920025E04RIK /// LOC667803 /// LOC672711 /// LOC674134	-1.76514	10.9046	3.29793e-09	7.19262e-07	histocompatibility 2, T region locus 23 /// RIKEN cDNA C920025E04 gene /// similar to H-2 class I histocompatibility antigen, D-37 alpha chain precursor /// similar to H-2 class I histocompatibility antigen, D-37 alpha chain precursor /// similar to H-2 class I histocompatibility antigen, D-37 alpha chain precursor
1449679_s_at	STX5	-1.68209	10.0039	3.32418e-09	7.19262e-07	syntaxin 5
1438855_x_at	TNFAIP2	-1.65903	7.56295	3.3277e-09	7.19262e-07	tumor necrosis factor, alpha-induced protein 2
1450914_at	PPP1R14B	1.66126	10.4518	3.33309e-09	7.19262e-07	protein phosphatase 1, regulatory (inhibitor) subunit 14B
1459994_x_at	TRFR2	-2.28058	7.5011	3.36721e-09	7.19985e-07	transferrin receptor 2
1433789_at	RNU17D /// LOC670438	2.01316	9.34362	3.36837e-09	7.19985e-07	RNA, U17d small nucleolar /// similar to RNA, U17d small nucleolar
1450854_at	PA2G4	1.62767	7.43962	3.4471e-09	7.33338e-07	proliferation-associated 2G4
1423241_a_at	TFDP1 /// LOC664889 /// LOC672007 /// LOC674691	1.51855	10.3204	3.48637e-09	7.34144e-07	transcription factor Dp 1 /// similar to Transcription factor Dp-1 (E2F dimerization partner 1) (DRTF1-polypeptide 1) /// similar to Transcription factor Dp-1 (E2F dimerization partner 1) (DRTF1-polypeptide 1) /// similar to Transcription factor Dp-1 (E2F dimerization partner 1) (DRTF1-polypeptide 1)
1420142_s_at	PA2G4	1.65812	9.19303	3.49855e-09	7.34144e-07	proliferation-associated 2G4
1437079_at	SLC18A2	-1.65444	10.93	3.50897e-09	7.34144e-07	solute carrier family 18 (vesicular monoamine), member 2
1449702_at	ZFAND2A	-1.52217	8.80519	3.516e-09	7.34144e-07	zinc finger, AN1-type domain 2A
1429295_s_at	TRIP13	1.5905	9.94648	3.59926e-09	7.35852e-07	thyroid hormone receptor interactor 13
1424906_at	PQLC3	-1.53185	8.7336	3.62118e-09	7.35852e-07	PQ loop repeat containing
1426946_at	RANBP5	1.51562	10.1557	3.62261e-09	7.35852e-07	RAN binding protein 5
1438037_at	HERC5	-1.75774	7.38014	3.63519e-09	7.35852e-07	hect domain and RLD 5
1428783_at	PRKAR2A	1.65343	8.67605	3.65239e-09	7.35852e-07	protein kinase, cAMP dependent regulatory, type II alpha
1437122_at	BCL2	1.5722	8.39339	3.65839e-09	7.35852e-07	B-cell leukemia/lymphoma 2
1436000_a_at	SKP2	2.03891	6.80443	3.66564e-09	7.35852e-07	S-phase kinase-associated protein 2 (p45)
1438569_at	CCDC38	-1.57166	8.10135	3.66937e-09	7.35852e-07	coiled-coil domain containing 38
1417037_at	ORC6L	1.52919	8.81978	3.68302e-09	7.35852e-07	origin recognition complex, subunit 6-like (S. cerevisiae)
1438527_at	RPL3 /// LOC242809 /// LOC433745 /// LOC545864 /// LOC635340 /// LOC668219 /// LOC669672 /// LOC670435 /// LOC670753 /// LOC674810 /// LOC674874	1.73295	8.8062	3.68733e-09	7.35852e-07	ribosomal protein L3 /// similar to 60S ribosomal protein L3 (J1 protein) /// similar to 60S ribosomal protein L3 (L4) /// similar to 60S ribosomal protein L3 (J1 protein) /// similar to 60S ribosomal protein L3 (L4) /// similar to ribosomal protein L3 isoform b /// similar to 60S ribosomal protein L3 (J1 protein) /// similar to 60S ribosomal protein L3 (J1 protein) /// similar to 60S ribosomal p…
1417075_at	2010309E21RIK	1.54595	10.0434	3.7387e-09	7.42815e-07	RIKEN cDNA 2010309E21 gene
1417768_at	1200006O19RIK	-1.51351	9.28844	3.75636e-09	7.43051e-07	RIKEN cDNA 1200006O19 gene
1425364_a_at	SLC3A2	-1.61033	11.187	3.77414e-09	7.43307e-07	solute carrier family 3 (activators of dibasic and neutral amino acid transport), member 2
1421186_at	CCR2	-1.61952	8.7404	3.82306e-09	7.47901e-07	chemokine (C-C motif) receptor 2
1439087_a_at	1500004A08RIK	-2.42921	6.69403	3.84111e-09	7.47901e-07	RIKEN cDNA 1500004A08 gene
1447800_x_at	TCN2	-1.58888	10.4919	3.84721e-09	7.47901e-07	Transcobalamin 2
1431893_a_at	PDSS1	2.05087	7.65111	3.87776e-09	7.50604e-07	prenyl (solanesyl) diphosphate synthase, subunit 1
1448274_at	C1QBP	1.5574	10.8487	3.89846e-09	7.51386e-07	complement component 1, q subcomponent binding protein
1431235_at	1110061A14RIK	1.78947	6.52434	3.92611e-09	7.53496e-07	RIKEN cDNA 1110061A14 gene
1416344_at	LAMP2	-1.52788	10.7816	3.95125e-09	7.55108e-07	lysosomal membrane glycoprotein 2
1443609_s_at	SYVN1	-1.60411	8.74954	3.98259e-09	7.56281e-07	synovial apoptosis inhibitor 1, synoviolin
1447541_s_at	ITGAE	-1.80613	6.89291	3.99469e-09	7.56281e-07	integrin, alpha E, epithelial-associated
1427742_a_at	KLF6	-1.75573	9.70469	4.02289e-09	7.56281e-07	Kruppel-like factor 6
1421498_a_at	2010204K13RIK	1.82196	7.6489	4.02447e-09	7.56281e-07	RIKEN cDNA 2010204K13 gene
1455841_s_at	GRWD1	1.77171	7.96094	4.09395e-09	7.66146e-07	glutamate-rich WD repeat containing 1
1452252_at	UTP20	1.47676	8.59508	4.15301e-09	7.73987e-07	UTP20, small subunit (SSU) processome component, homolog (yeast)
1426853_at	SET	1.56389	11.6315	4.19287e-09	7.7493e-07	SET translocation
1427074_at	PCMTD2	-1.78738	8.53994	4.19359e-09	7.7493e-07	protein-L-isoaspartate (D-aspartate) O-methyltransferase domain containing 2
1438016_at	BC068171	1.50414	11.23	4.20961e-09	7.7493e-07	cDNA sequence BC068171
1423060_at	PA2G4	1.52303	10.8663	4.26767e-09	7.78244e-07	proliferation-associated 2G4
1416768_at	1110003E01RIK	-1.52446	9.71657	4.2697e-09	7.78244e-07	RIKEN cDNA 1110003E01 gene
1449116_a_at	DTYMK	1.48698	9.71436	4.29061e-09	7.78244e-07	deoxythymidylate kinase
1460367_at	HBP1	-2.2267	9.52754	4.33811e-09	7.78244e-07	high mobility group box transcription factor 1
1422979_at	SUV39H2	2.17417	5.87585	4.34249e-09	7.78244e-07	suppressor of variegation 3-9 homolog 2 (Drosophila)
1460247_a_at	SKP2	1.81926	7.63658	4.34939e-09	7.78244e-07	S-phase kinase-associated protein 2 (p45)
1416431_at	TUBB6	1.7836	8.50252	4.35341e-09	7.78244e-07	tubulin, beta 6
1435998_at	GM288	2.41275	7.83267	4.36566e-09	7.78244e-07	gene model 288, (NCBI)
1416333_at	DOK2	1.66519	9.1266	4.42123e-09	7.85046e-07	docking protein 2
1416122_at	CCND2	1.57501	11.0373	4.52188e-09	7.99769e-07	cyclin D2
1416424_at	M6PRBP1	-1.71073	8.67117	4.59716e-09	8.09909e-07	mannose-6-phosphate receptor binding protein 1
1454757_s_at	D12ERTD647E	-1.47973	10.178	4.62145e-09	8.11019e-07	DNA segment, Chr 12, ERATO Doi 647, expressed
1437658_a_at	SNORD22	1.87262	8.37259	4.64172e-09	8.11419e-07	small nucleolar RNA, C/D box 22
1432827_x_at	UBC	-1.4449	13.0072	4.66154e-09	8.11531e-07	ubiquitin C
1451122_at	IDI1	1.77985	8.91422	4.68678e-09	8.11531e-07	isopentenyl-diphosphate delta isomerase
1426885_a_at	CDK2AP1	1.64525	9.29253	4.69634e-09	8.11531e-07	CDK2 (cyclin-dependent kinase 2)-associated protein 1
1450783_at	IFIT1	-3.90028	5.88448	4.7953e-09	8.25469e-07	interferon-induced protein with tetratricopeptide repeats 1
1416903_at	NUCB1	-1.47355	9.51962	4.91333e-09	8.39881e-07	nucleobindin 1
1416962_at	RCC1	1.73894	8.32272	4.91627e-09	8.39881e-07	regulator of chromosome condensation 1
1443867_at	ANKRD12	-1.58547	7.0687	4.96506e-09	8.45016e-07	ankyrin repeat domain 12
1454942_at	C1ORF24	-1.6764	8.85881	4.98506e-09	8.4523e-07	chromosome 1 open reading frame 24
1435477_s_at	FCGR2B	-1.77407	7.26983	5.01293e-09	8.46773e-07	Fc receptor, IgG, low affinity IIb
1428083_at	2310043N10RIK	-1.69267	9.46427	5.18033e-09	8.71784e-07	RIKEN cDNA 2310043N10 gene
1447337_at	DAPP1	-1.56149	8.00212	5.21872e-09	8.7498e-07	Dual adaptor for phosphotyrosine and 3-phosphoinositides 1
1424425_a_at	MTAP	1.78488	10.9508	5.3112e-09	8.87187e-07	methylthioadenosine phosphorylase
1426484_at	UBXD2	-1.87318	8.35157	5.45523e-09	9.07883e-07	UBX domain containing 2
1424327_at	3200002M19RIK	1.51703	7.65916	5.5451e-09	9.14768e-07	RIKEN cDNA 3200002M19 gene
1416939_at	PPA1	1.6151	10.029	5.54749e-09	9.14768e-07	pyrophosphatase (inorganic) 1
1428281_at	TRUB1	1.43581	8.31981	5.56068e-09	9.14768e-07	TruB pseudouridine (psi) synthase homolog 1 (E. coli)
1416998_at	RRS1	1.39425	10.1128	5.60587e-09	9.14768e-07	RRS1 ribosome biogenesis regulator homolog (S. cerevisiae)
1456956_at	ZFPN1A2	-1.78159	8.50704	5.63622e-09	9.14768e-07	zinc finger protein, subfamily 1A, 2 (Helios)
1416866_at	BET1	-1.57156	8.36964	5.63948e-09	9.14768e-07	blocked early in transport 1 homolog (S. cerevisiae)
1424328_s_at	3200002M19RIK	1.57291	7.12224	5.70574e-09	9.14768e-07	RIKEN cDNA 3200002M19 gene
1417141_at	IGTP	-1.58117	7.52404	5.70599e-09	9.14768e-07	interferon gamma induced GTPase
1454659_at	DCTD	2.03906	7.5252	5.75417e-09	9.14768e-07	dCMP deaminase
1448777_at	MCM2	1.78862	9.0717	5.75768e-09	9.14768e-07	minichromosome maintenance deficient 2 mitotin (S. cerevisiae)
1430127_a_at	CCND2	1.61704	9.94173	5.76867e-09	9.14768e-07	cyclin D2
1455956_x_at	CCND2	1.51835	10.2275	5.77721e-09	9.14768e-07	cyclin D2
1451012_a_at	CSDA	1.53799	10.9325	5.77801e-09	9.14768e-07	cold shock domain protein A
1416439_at	2410015N17RIK	1.58655	9.15486	5.78056e-09	9.14768e-07	RIKEN cDNA 2410015N17 gene
1438178_x_at	ATAD3A	1.45581	10.134	5.81248e-09	9.16604e-07	ATPase family, AAA domain containing 3A
1417212_at	9530058B02RIK	1.8512	7.96061	5.88471e-09	9.22896e-07	RIKEN cDNA 9530058B02 gene
1415802_at	SLC16A1	1.44773	10.6475	5.89331e-09	9.22896e-07	solute carrier family 16 (monocarboxylic acid transporters), member 1
1428296_at	POLR2L	1.58549	9.80941	5.94584e-09	9.25986e-07	polymerase (RNA) II (DNA directed) polypeptide L
1424315_at	1110004E09RIK	1.69082	7.66246	5.9541e-09	9.25986e-07	RIKEN cDNA 1110004E09 gene
1434079_s_at	MCM2	1.38265	9.95973	6.01315e-09	9.31956e-07	minichromosome maintenance deficient 2 mitotin (S. cerevisiae)
1435626_a_at	HERPUD1	-1.84373	9.02196	6.05448e-09	9.35148e-07	homocysteine-inducible, endoplasmic reticulum stress-inducible, ubiquitin-like domain member 1
1443858_at	TRIM34	-1.48042	8.8783	6.14576e-09	9.44382e-07	Tripartite motif protein 34
1424620_at	D13WSU177E	1.48226	8.68534	6.15615e-09	9.44382e-07	DNA segment, Chr 13, Wayne State University 177, expressed
1448330_at	GSTM1	-2.31499	7.18107	6.19284e-09	9.45828e-07	glutathione S-transferase, mu 1
1416605_at	NOLA2	1.69267	9.81218	6.20751e-09	9.45828e-07	nucleolar protein family A, member 2
1422198_a_at	SHMT1	1.63888	6.51889	6.30005e-09	9.55478e-07	serine hydroxymethyl transferase 1 (soluble)
1433694_at	PDE3B	-1.56989	10.7654	6.31322e-09	9.55478e-07	phosphodiesterase 3B, cGMP-inhibited
1418401_a_at	DUSP16	-1.94829	7.1629	6.37451e-09	9.58669e-07	dual specificity phosphatase 16
1429261_at	LOC664968 /// LOC669621 /// LOC675341	1.59759	7.19926	6.37681e-09	9.58669e-07	hypothetical protein LOC664968 /// hypothetical protein LOC669621 /// hypothetical protein LOC675341
1417352_s_at	SNRPA1	1.52834	9.44351	6.47074e-09	9.69557e-07	small nuclear ribonucleoprotein polypeptide A'
1440275_at	RUNX3	1.4412	9.53013	6.57099e-09	9.81319e-07	runt related transcription factor 3
1417726_at	SSSCA1	1.71843	9.05643	6.61147e-09	9.84106e-07	Sjogren's syndrome/scleroderma autoantigen 1 homolog (human)
1424300_at	GEMIN6	1.84535	8.05691	6.69362e-09	9.89606e-07	gem (nuclear organelle) associated protein 6
1422483_a_at	CYCS /// LOC672195	1.96909	10.3587	6.70603e-09	9.89606e-07	cytochrome c, somatic /// similar to Cytochrome c, somatic
1427996_at	BC028528	-1.86176	8.07284	6.71425e-09	9.89606e-07	cDNA sequence BC028528
1435608_at	ZNRF3 /// LOC631806	1.46063	6.4647	6.75224e-09	9.91964e-07	zinc and ring finger 3 /// similar to Goliath homolog precursor (Ring finger protein 130) (R-goliath)
1418377_a_at	SIVA	1.42656	9.0686	6.79405e-09	9.94865e-07	Cd27 binding protein (Hindu God of destruction)
1416258_at	TK1	2.38068	8.52384	6.85989e-09	1.00035e-06	thymidine kinase 1
1418825_at	IRGM	-1.71483	9.08781	6.91515e-09	1.00035e-06	immunity-related GTPase family, M
1440076_at	SQSTM1	-1.78909	8.22332	6.92817e-09	1.00035e-06	Sequestosome 1
1456541_x_at	ATAD3A	1.45461	9.27234	6.93734e-09	1.00035e-06	ATPase family, AAA domain containing 3A
1448343_a_at	NBR1	-1.46629	10.1013	6.94243e-09	1.00035e-06	neighbor of Brca1 gene 1
1435454_a_at	BC006779	-2.15371	8.8116	6.99101e-09	1.00415e-06	cDNA sequence BC006779
1449265_at	CASP1	-1.4096	8.6167	7.03804e-09	1.00769e-06	caspase 1
1439825_at	DTX3L	-1.54058	9.21397	7.08013e-09	1.01051e-06	deltex 3-like (Drosophila)
1418274_at	NUTF2 /// LOC621832 /// LOC668830 /// LOC670887 /// LOC675580	1.34204	10.6756	7.17706e-09	1.01911e-06	nuclear transport factor 2 /// similar to Nuclear transport factor 2 (NTF-2) /// similar to Nuclear transport factor 2 (NTF-2) /// similar to Nuclear transport factor 2 (NTF-2) /// similar to Nuclear transport factor 2 (NTF-2)
1428142_at	ETV5	2.61821	7.21016	7.18555e-09	1.01911e-06	ets variant gene 5
1421911_at	STAT2	-1.74965	6.99014	7.3074e-09	1.03293e-06	signal transducer and activator of transcription 2
1416336_s_at	SNRPD1	1.59988	9.66435	7.33634e-09	1.03293e-06	small nuclear ribonucleoprotein D1
1456314_x_at	CDK2AP1	1.4424	11.3506	7.36802e-09	1.03293e-06	CDK2 (cyclin-dependent kinase 2)-associated protein 1
1426275_a_at	UXS1	1.54413	7.49725	7.42423e-09	1.03293e-06	UDP-glucuronate decarboxylase 1
1418240_at	GBP2	-1.74247	4.94045	7.44305e-09	1.03293e-06	guanylate nucleotide binding protein 2
1422449_s_at	RCN2	1.39826	9.44423	7.44972e-09	1.03293e-06	reticulocalbin 2
1453512_at	5830407P18RIK	-1.59504	7.69405	7.46218e-09	1.03293e-06	RIKEN cDNA 5830407P18 gene
1416138_at	ANXA7	-1.3412	10.6003	7.46625e-09	1.03293e-06	annexin A7
1430636_at	C030010B13RIK	-1.89227	6.35466	7.5094e-09	1.03572e-06	RIKEN cDNA C030010B13 gene
1448947_at	2810004N23RIK	1.38507	8.47128	7.56695e-09	1.04048e-06	RIKEN cDNA 2810004N23 gene
1428892_at	PPIL1	1.68515	7.38572	7.61042e-09	1.04328e-06	peptidylprolyl isomerase (cyclophilin)-like 1
1426482_at	PRKRIR	1.50207	8.81757	7.66195e-09	1.04716e-06	protein-kinase, interferon-inducible double stranded RNA dependent inhibitor, repressor of (P58 repressor)
1416897_at	PARP9	-1.8823	9.12295	7.70722e-09	1.05016e-06	poly (ADP-ribose) polymerase family, member 9
1452956_a_at	D12ERTD647E	-1.43305	10.3976	7.7319e-09	1.05035e-06	DNA segment, Chr 12, ERATO Doi 647, expressed
1418305_s_at	NOLA1	1.3825	10.3847	7.87514e-09	1.0666e-06	nucleolar protein family A, member 1 (H/ACA small nucleolar RNPs)
1419829_a_at	GAB2	-1.69168	8.48793	7.90913e-09	1.06799e-06	Growth factor receptor bound protein 2-associated protein 2
1449996_a_at	TPM3	1.50197	7.28346	7.94937e-09	1.07022e-06	tropomyosin 3, gamma
1416563_at	CTPS	2.04395	9.0298	8.00889e-09	1.07503e-06	cytidine 5'-triphosphate synthase
1452787_a_at	PRMT1	1.76758	9.6132	8.05345e-09	1.0778e-06	protein arginine N-methyltransferase 1
1442416_at	D930001B02	-1.60695	7.77736	8.18073e-09	1.09096e-06	hypothetical protein D930001B02
1438480_a_at	THYN1	1.42154	8.20922	8.20014e-09	1.09096e-06	thymocyte nuclear protein 1
1415940_at	ZFAND2A	-1.5386	9.10247	8.29071e-09	1.09836e-06	zinc finger, AN1-type domain 2A
1455581_x_at	9530028C05	-2.10349	8.05509	8.32331e-09	1.09836e-06	hypothetical protein 9530028C05
1425189_a_at	MRPL15	1.37963	8.77424	8.32886e-09	1.09836e-06	mitochondrial ribosomal protein L15
1435655_at	SNORA65	1.49614	8.31519	8.38847e-09	1.103e-06	small nucleolar RNA, H/ACA box 65
1454967_at	---	-1.83219	8.00494	8.46545e-09	1.10877e-06	Transcribed locus
1424323_at	NOC2L	1.46317	8.35793	8.48152e-09	1.10877e-06	nucleolar complex associated 2 homolog (S. cerevisiae)
1451386_at	BLVRB	-1.48358	9.13278	8.64969e-09	1.12749e-06	biliverdin reductase B (flavin reductase (NADPH))
1436212_at	TMEM71	-2.73058	6.63885	8.71538e-09	1.13277e-06	transmembrane protein 71
1416073_a_at	NUP85	1.4136	9.21601	8.80289e-09	1.14086e-06	nucleoporin 85
1438752_at	A230058F20RIK	-1.78761	8.669	8.86135e-09	1.14143e-06	RIKEN cDNA A230058F20 gene
1422433_s_at	IDH1	-1.69817	8.94581	8.86864e-09	1.14143e-06	isocitrate dehydrogenase 1 (NADP+), soluble
1452987_at	JOSD3	1.58115	5.60565	8.88322e-09	1.14143e-06	Josephin domain containing 3
1437820_at	FKHL18	1.90851	6.24434	8.93678e-09	1.14505e-06	forkhead-like 18 (Drosophila)
1447165_at	ANKRD12	-1.88612	5.71397	9.07149e-09	1.15642e-06	Ankyrin repeat domain 12
1425921_a_at	1810055G02RIK	1.58893	8.24688	9.09604e-09	1.15642e-06	RIKEN cDNA 1810055G02 gene
1425966_x_at	UBC	-1.31917	11.5371	9.10241e-09	1.15642e-06	ubiquitin C
1452608_at	MYCBP	2.05009	7.31871	9.13639e-09	1.15747e-06	c-myc binding protein
1455035_s_at	NOL5A	1.77256	10.8839	9.24835e-09	1.16838e-06	nucleolar protein 5A
1427938_at	MYCBP	1.5335	8.7975	9.28766e-09	1.17006e-06	c-myc binding protein
1435640_x_at	A130040M12RIK	-2.44268	4.31317	9.39687e-09	1.17933e-06	RIKEN cDNA A130040M12 gene
1437327_x_at	2310057D15RIK	1.40598	9.42842	9.49211e-09	1.17933e-06	RIKEN cDNA 2310057D15 gene
1415917_at	MTHFD1	1.93523	8.87832	9.49991e-09	1.17933e-06	methylenetetrahydrofolate dehydrogenase (NADP+ dependent), methenyltetrahydrofolate cyclohydrolase, formyltetrahydrofolate synthase
1416859_at	FKBP3	1.4628	9.46696	9.51033e-09	1.17933e-06	FK506 binding protein 3
1423823_at	2610012O22RIK	1.66334	9.00139	9.56781e-09	1.17933e-06	RIKEN cDNA 2610012O22 gene
1448898_at	CCL9	-1.83841	8.84473	9.59126e-09	1.17933e-06	chemokine (C-C motif) ligand 9
1434524_at	EIF2B3	1.69669	8.2849	9.61638e-09	1.17933e-06	eukaryotic translation initiation factor 2B, subunit 3
1419357_at	5830446M03RIK	1.40054	7.70019	9.61778e-09	1.17933e-06	RIKEN cDNA 5830446M03 gene
1421945_a_at	BXDC1	1.46793	7.99605	9.63831e-09	1.17933e-06	brix domain containing 1
1416925_at	KPNB1	1.42674	8.9805	9.6698e-09	1.17933e-06	karyopherin (importin) beta 1
1418129_at	DHCR24	1.38214	8.13941	9.69024e-09	1.17933e-06	24-dehydrocholesterol reductase
1426276_at	IFIH1	-1.78852	7.10928	9.69087e-09	1.17933e-06	interferon induced with helicase C domain 1
1435302_at	TAF4B	1.40732	7.80251	9.72698e-09	1.17933e-06	TAF4B RNA polymerase II, TATA box binding protein (TBP)-associated factor
1421819_a_at	SET /// LOC671392	1.66174	11.3495	9.75075e-09	1.17933e-06	SET translocation /// similar to SET protein (Phosphatase 2A inhibitor I2PP2A) (I-2PP2A) (Template-activating factor I) (TAF-I) (Liver regeneration-related protein LRRGR00002)
1437108_at	LSM6	1.55803	7.2734	9.75347e-09	1.17933e-06	LSM6 homolog, U6 small nuclear RNA associated (S. cerevisiae)
1423520_at	LMNB1	1.50514	7.71254	1.00415e-08	1.21092e-06	lamin B1
1438183_x_at	SORD	-1.5676	7.89698	1.00871e-08	1.21316e-06	sorbitol dehydrogenase
1448291_at	MMP9	2.43542	7.61435	1.01534e-08	1.21429e-06	matrix metallopeptidase 9
1433668_at	PNRC1	-1.52654	10.4867	1.0176e-08	1.21429e-06	proline-rich nuclear receptor coactivator 1
1418072_at	HIST1H2BC	-1.92447	9.19232	1.02148e-08	1.21429e-06	histone 1, H2bc
1448633_at	PRPF31	1.39522	8.13932	1.02265e-08	1.21429e-06	PRP31 pre-mRNA processing factor 31 homolog (yeast)
1422461_at	ATAD3A	1.33525	8.34913	1.02311e-08	1.21429e-06	ATPase family, AAA domain containing 3A
1451248_at	PRMT7	1.63245	7.03857	1.02961e-08	1.21638e-06	protein arginine N-methyltransferase 7
1437859_x_at	EIF5A	1.62643	9.96132	1.03026e-08	1.21638e-06	eukaryotic translation initiation factor 5A
1415961_at	ITM2C	-1.34852	10.0596	1.03519e-08	1.21901e-06	integral membrane protein 2C
1450919_at	MPP1	-1.49307	8.77369	1.03898e-08	1.22028e-06	membrane protein, palmitoylated
1420138_at	SLC19A1	1.32946	8.71722	1.05998e-08	1.24171e-06	solute carrier family 19 (sodium/hydrogen exchanger), member 1
1417096_at	2810430M08RIK	1.62046	8.53781	1.06675e-08	1.24414e-06	RIKEN cDNA 2810430M08 gene
1442947_x_at	---	-1.39704	4.41732	1.06757e-08	1.24414e-06	13 days embryo heart cDNA, RIKEN full-length enriched library, clone:D330042P15 product:unclassifiable, full insert sequence
1416606_s_at	NOLA2	1.40013	11.5219	1.07724e-08	1.24888e-06	nucleolar protein family A, member 2
1434216_a_at	NUDT19	1.36558	8.85069	1.0806e-08	1.24888e-06	nudix (nucleoside diphosphate linked moiety X)-type motif 19
1439516_at	2610201A13RIK	2.01844	7.15106	1.08237e-08	1.24888e-06	RIKEN cDNA 2610201A13 gene
1415733_a_at	1110019J04RIK	1.38562	11.3704	1.08496e-08	1.24888e-06	RIKEN cDNA 1110019J04 gene
1433772_at	STCH	-1.33518	11.1919	1.08548e-08	1.24888e-06	stress 70 protein chaperone, microsome-associated, human homolog
1455820_x_at	SCARB1	1.41327	7.76327	1.09072e-08	1.25172e-06	scavenger receptor class B, member 1
1448526_at	KPNB1	1.40714	9.73492	1.10494e-08	1.26482e-06	karyopherin (importin) beta 1
1416135_at	APEX1	1.43802	10.061	1.11611e-08	1.27438e-06	apurinic/apyrimidinic endonuclease 1
1416093_a_at	MRPL20	1.35903	9.46084	1.13971e-08	1.298e-06	mitochondrial ribosomal protein L20
1437956_at	BB220380	-1.36187	7.64726	1.14256e-08	1.298e-06	expressed sequence BB220380
1422938_at	BCL2	1.33056	8.64502	1.1489e-08	1.30193e-06	B-cell leukemia/lymphoma 2
1459967_at	---	1.74067	6.34603	1.15496e-08	1.30277e-06	Transcribed locus
1421083_x_at	BANF1	1.34325	10.3174	1.15543e-08	1.30277e-06	barrier to autointegration factor 1
1424843_a_at	GAS5	1.6804	8.44668	1.15859e-08	1.30308e-06	growth arrest specific 5
1434316_at	CHSY1	1.44855	9.68749	1.17513e-08	1.31187e-06	carbohydrate (chondroitin) synthase 1
1419165_at	ZFP260 /// LOC635007	-1.4963	8.05853	1.18077e-08	1.31187e-06	zinc finger protein 260 /// similar to Zinc finger protein OZF (Zinc finger protein 260) (Zfp-260)
1448685_at	2900010M23RIK	1.34416	10.514	1.18143e-08	1.31187e-06	RIKEN cDNA 2900010M23 gene
1433936_at	0610010E21RIK	1.43402	8.02765	1.18152e-08	1.31187e-06	RIKEN cDNA 0610010E21 gene
1434642_at	DHRS8	-1.61217	11.1873	1.18332e-08	1.31187e-06	dehydrogenase/reductase (SDR family) member 8
1422661_at	LGALS8	-1.85635	7.68879	1.18386e-08	1.31187e-06	lectin, galactose binding, soluble 8
1438817_at	DNA2L	1.58865	6.95397	1.20217e-08	1.32678e-06	DNA2 DNA replication helicase 2-like (yeast)
1448230_at	USP10	1.41573	8.83948	1.2032e-08	1.32678e-06	ubiquitin specific peptidase 10
1416767_a_at	1110003E01RIK	-1.67967	9.79546	1.20907e-08	1.33e-06	RIKEN cDNA 1110003E01 gene
1416184_s_at	HMGA1	1.32749	9.71039	1.22266e-08	1.34169e-06	high mobility group AT-hook 1
1447784_x_at	9130023D20RIK	-1.35569	7.32397	1.22625e-08	1.34236e-06	RIKEN cDNA 9130023D20 gene
1417656_at	MYBL2	2.12873	6.94975	1.2358e-08	1.34953e-06	myeloblastosis oncogene-like 2
1435827_at	4933404O12RIK	1.52571	8.49716	1.23997e-08	1.35082e-06	RIKEN cDNA 4933404O12 gene
1457687_at	BCL2	1.28326	11.0065	1.24367e-08	1.35159e-06	B-cell leukemia/lymphoma 2
1422768_at	SYNCRIP	1.39621	9.15171	1.24972e-08	1.35489e-06	synaptotagmin binding, cytoplasmic RNA interacting protein
1417390_at	XAB1	1.27322	8.83655	1.25379e-08	1.35605e-06	XPA binding protein 1
1416690_at	GTPBP2	-1.37335	8.24515	1.27492e-08	1.37227e-06	GTP binding protein 2
1448694_at	JUN	-1.68663	6.17	1.27553e-08	1.37227e-06	Jun oncogene
1434479_at	COL5A1	-1.54548	8.79761	1.27792e-08	1.37227e-06	Procollagen, type V, alpha 1
1449519_at	GADD45A	-2.2523	8.3484	1.28689e-08	1.37862e-06	growth arrest and DNA-damage-inducible 45 alpha
1423850_at	NSUN2	1.39535	10.327	1.2983e-08	1.38235e-06	NOL1/NOP2/Sun domain family 2
1460713_at	BC048355	1.58174	8.17981	1.29851e-08	1.38235e-06	cDNA sequence BC048355
1416393_at	EMG1	1.27438	10.8672	1.29956e-08	1.38235e-06	EMG1 nucleolar protein homolog (S. cerevisiae)
1423383_a_at	OSBPL9	-1.28276	10.1178	1.30349e-08	1.38327e-06	oxysterol binding protein-like 9
1453731_a_at	TMEM77	-1.38055	9.35661	1.30924e-08	1.3861e-06	transmembrane protein 77
1422535_at	CCNE2	2.44351	7.95278	1.31258e-08	1.38639e-06	cyclin E2
1456174_x_at	NDRG1	-1.28574	9.97403	1.31934e-08	1.39027e-06	N-myc downstream regulated gene 1
1434222_at	SIPA1L1	-1.73048	8.84724	1.32747e-08	1.39558e-06	signal-induced proliferation-associated 1 like 1
1450735_at	1810003N24RIK	1.31449	10.0636	1.33218e-08	1.39727e-06	RIKEN cDNA 1810003N24 gene
1460551_at	RAN	1.62115	9.36977	1.33668e-08	1.39874e-06	RAN, member RAS oncogene family
1428267_at	DHX40	-1.57919	9.33541	1.35359e-08	1.41077e-06	DEAH (Asp-Glu-Ala-His) box polypeptide 40
1418372_at	ADSL	1.32754	8.8186	1.35626e-08	1.41077e-06	adenylosuccinate lyase
1449052_a_at	DNMT3B	1.25351	8.87609	1.35991e-08	1.41077e-06	DNA methyltransferase 3B
1433508_at	KLF6	-1.98234	9.7364	1.36317e-08	1.41077e-06	Kruppel-like factor 6
1434405_at	A730024A03RIK	-1.25795	10.456	1.36382e-08	1.41077e-06	RIKEN cDNA A730024A03 gene
1448740_at	2400006H24RIK	1.27756	7.10249	1.37103e-08	1.41498e-06	RIKEN cDNA 2400006H24 gene
1449354_at	ZRSR1	-1.40741	7.46698	1.37936e-08	1.42033e-06	zinc finger (CCCH type), RNA-binding motif and serine/arginine rich 1
1440831_at	BACH1	-1.55866	9.81236	1.38779e-08	1.42575e-06	BTB and CNC homology 1
1452012_a_at	EXOSC1	1.39422	10.019	1.39381e-08	1.42632e-06	exosome component 1
1451347_at	CCDC95	1.43723	6.3871	1.39699e-08	1.42632e-06	coiled-coil domain containing 95
1421998_at	TOR3A	-1.727	6.95464	1.40165e-08	1.42632e-06	torsin family 3, member A
1454197_a_at	CCDC86	1.51008	7.20178	1.40818e-08	1.42632e-06	coiled-coil domain containing 86
1417019_a_at	CDC6	1.98306	8.47896	1.40917e-08	1.42632e-06	cell division cycle 6 homolog (S. cerevisiae)
1442511_at	IPO7	1.53252	6.5077	1.40987e-08	1.42632e-06	importin 7
1434228_at	PPM2C	1.71723	7.71066	1.41255e-08	1.42632e-06	protein phosphatase 2C, magnesium dependent, catalytic subunit
1416973_at	NHP2L1	1.24293	10.9703	1.41366e-08	1.42632e-06	NHP2 non-histone chromosome protein 2-like 1 (S. cerevisiae)
1422478_a_at	ACSS2	-1.3936	9.1805	1.4168e-08	1.42632e-06	acyl-CoA synthetase short-chain family member 2
1449039_a_at	HNRPDL	1.31934	10.193	1.42198e-08	1.42835e-06	heterogeneous nuclear ribonucleoprotein D-like
1439227_at	UHRF1	1.67556	7.4857	1.44079e-08	1.4352e-06	ubiquitin-like, containing PHD and RING finger domains, 1
1426631_at	PUS7	1.58988	8.8628	1.44265e-08	1.4352e-06	pseudouridylate synthase 7 homolog (S. cerevisiae)
1423957_at	ISG20L1	1.40453	7.75029	1.44295e-08	1.4352e-06	interferon stimulated exonuclease gene 20-like 1
1434059_at	B230312A22RIK	-1.33495	7.00986	1.44366e-08	1.4352e-06	RIKEN cDNA B230312A22 gene
1441391_at	GNB1L	1.3507	8.02555	1.44472e-08	1.4352e-06	Guanine nucleotide binding protein (G protein), beta polypeptide 1-like
1417053_at	PHB /// LOC665511 /// LOC669197 /// LOC674314	1.419	9.71426	1.45113e-08	1.43841e-06	prohibitin /// similar to prohibitin /// similar to prohibitin /// similar to prohibitin
1415929_at	MAP1LC3B	-1.43276	10.3779	1.45559e-08	1.43966e-06	microtubule-associated protein 1 light chain 3 beta
1426483_at	PRKRIR	1.39638	8.53595	1.4668e-08	1.44085e-06	protein-kinase, interferon-inducible double stranded RNA dependent inhibitor, repressor of (P58 repressor)
1455341_at	2010003J03RIK	1.34851	9.02596	1.46935e-08	1.44085e-06	RIKEN cDNA 2010003J03 gene
1434185_at	LOC672245	1.44759	8.63993	1.47151e-08	1.44085e-06	similar to acetyl-coenzyme A carboxylase alpha
1452831_s_at	PPAT	1.83963	8.82416	1.47224e-08	1.44085e-06	phosphoribosyl pyrophosphate amidotransferase
1421081_a_at	BANF1	1.33846	10.4033	1.47277e-08	1.44085e-06	barrier to autointegration factor 1
1449044_at	EEF1E1	1.50414	9.83041	1.48196e-08	1.44671e-06	eukaryotic translation elongation factor 1 epsilon 1
1433759_at	DPY19L1	1.37195	8.76224	1.48587e-08	1.44739e-06	dpy-19-like 1 (C. elegans)
1420563_at	GRIA3	-1.59486	8.65397	1.49409e-08	1.45196e-06	glutamate receptor, ionotropic, AMPA3 (alpha 3)
1429080_at	MPHOSPH10	1.29553	9.41621	1.497e-08	1.45196e-06	M-phase phosphoprotein 10 (U3 small nucleolar ribonucleoprotein)
1448144_at	HNRPAB	1.36692	8.87742	1.51038e-08	1.46055e-06	heterogeneous nuclear ribonucleoprotein A/B
1460260_s_at	KPNA1	1.35266	9.19297	1.51397e-08	1.46055e-06	karyopherin (importin) alpha 1
1435372_a_at	PA2G4	1.40868	8.98696	1.51557e-08	1.46055e-06	proliferation-associated 2G4
1423431_a_at	MYBBP1A	1.47746	10.6239	1.53175e-08	1.473e-06	MYB binding protein (P160) 1a
1418027_at	EXO1	1.72144	6.53726	1.54873e-08	1.48615e-06	exonuclease 1
1426323_x_at	SIVA	1.25336	9.83121	1.56303e-08	1.4967e-06	Cd27 binding protein (Hindu God of destruction)
1418026_at	EXO1	1.86518	7.69172	1.56806e-08	1.49833e-06	exonuclease 1
1459211_at	GLI2	-1.32491	6.59843	1.57255e-08	1.49944e-06	GLI-Kruppel family member GLI2
1438761_a_at	ODC1 /// LOC666231 /// LOC668343 /// LOC670279 /// LOC671973 /// LOC673302	1.32149	10.9548	1.57632e-08	1.49987e-06	ornithine decarboxylase, structural 1 /// similar to Ornithine decarboxylase (ODC) /// similar to Ornithine decarboxylase (ODC) /// similar to Ornithine decarboxylase (ODC) /// hypothetical protein LOC671973 /// similar to Ornithine decarboxylase (ODC)
1435660_at	C130026I21RIK /// A530032D15RIK /// LOC620078	-1.51308	7.42357	1.58325e-08	1.50328e-06	RIKEN cNDA C130026I21 gene /// RIKEN cDNA A530032D15Rik gene /// similar to SP140 nuclear body protein (predicted)
1448370_at	ULK1	-1.51153	8.02627	1.60004e-08	1.50663e-06	Unc-51 like kinase 1 (C. elegans)
1437378_x_at	SCARB1	1.50995	7.2779	1.60021e-08	1.50663e-06	scavenger receptor class B, member 1
1455090_at	---	1.77024	8.97929	1.60601e-08	1.50663e-06	---
1439090_at	D030022P07RIK	-1.31381	7.96236	1.60713e-08	1.50663e-06	RIKEN cDNA D030022P07 gene
1452458_s_at	PPIL5	1.84186	8.56594	1.60795e-08	1.50663e-06	peptidylprolyl isomerase (cyclophilin) like 5
1456280_at	CLSPN	1.43963	9.10215	1.60969e-08	1.50663e-06	claspin homolog (Xenopus laevis)
1435509_x_at	CDK2AP1	1.38481	11.4684	1.61632e-08	1.50663e-06	CDK2 (cyclin-dependent kinase 2)-associated protein 1
1425166_at	RBL1	1.40552	7.13172	1.61652e-08	1.50663e-06	retinoblastoma-like 1 (p107)
1425381_a_at	TRFR2	-1.46313	7.69209	1.61979e-08	1.50663e-06	transferrin receptor 2
1428291_at	EXOSC8	1.38188	10.0483	1.62282e-08	1.50663e-06	exosome component 8
1416151_at	SFRS3	1.38083	8.61619	1.62352e-08	1.50663e-06	splicing factor, arginine/serine-rich 3 (SRp20)
1456367_at	FUT8	-1.26106	8.4902	1.62744e-08	1.50671e-06	fucosyltransferase 8
1435679_at	OPTN	-1.74243	7.71259	1.63029e-08	1.50671e-06	optineurin
1422767_at	BYSL	1.67112	8.0334	1.64268e-08	1.5122e-06	bystin-like
1433648_at	SPAG9	-1.43824	10.4432	1.64293e-08	1.5122e-06	sperm associated antigen 9
1438439_at	GPR171	-1.59419	9.08316	1.6481e-08	1.51278e-06	G protein-coupled receptor 171
1434457_at	SP100	-2.25831	6.76977	1.65027e-08	1.51278e-06	nuclear antigen Sp100
1433970_at	BOLA3	1.54104	9.39694	1.65702e-08	1.51588e-06	bolA-like 3 (E. coli)
1416740_at	COL5A1	-1.49809	9.68345	1.66097e-08	1.51643e-06	procollagen, type V, alpha 1
1423456_at	BZW2	1.41272	10.2152	1.67966e-08	1.52808e-06	basic leucine zipper and W2 domains 2
1448277_at	POLD2	1.71701	8.23685	1.68051e-08	1.52808e-06	polymerase (DNA directed), delta 2, regulatory subunit
1454703_x_at	SNORD22	1.59907	7.76012	1.69224e-08	1.53565e-06	small nucleolar RNA, C/D box 22
1415812_at	GSN	-1.32072	8.9431	1.69926e-08	1.53722e-06	gelsolin
1422489_at	GCS1	1.29266	8.78531	1.70338e-08	1.53722e-06	glucosidase 1
1439537_at	---	-1.54596	8.59101	1.70429e-08	1.53722e-06	---
1442654_at	A530054K11RIK	-1.37805	7.76342	1.70913e-08	1.53722e-06	RIKEN cDNA A530054K11 gene
1437666_x_at	UBC	-1.33415	12.8588	1.71102e-08	1.53722e-06	ubiquitin C
1434150_a_at	METTL7A /// UBIE	-2.51834	9.48847	1.71778e-08	1.53795e-06	methyltransferase like 7A /// UbiE-YGHL1 fusion protein
1426118_a_at	TOMM40	1.43978	7.99248	1.71865e-08	1.53795e-06	translocase of outer mitochondrial membrane 40 homolog (yeast)
1436968_x_at	KLHL24	-2.83327	6.43574	1.72605e-08	1.54116e-06	kelch-like 24 (Drosophila)
1417100_at	CD320	1.5746	7.13016	1.7292e-08	1.54116e-06	CD320 antigen
1415699_a_at	GPS1	1.4224	9.53977	1.73249e-08	1.54116e-06	G protein pathway suppressor 1
1419821_s_at	IDH1	-1.69426	7.45253	1.75429e-08	1.55462e-06	isocitrate dehydrogenase 1 (NADP+), soluble
1456411_at	RCCD1	1.25078	6.78221	1.75451e-08	1.55462e-06	RCC1 domain containing 1
1422501_s_at	IDH3A	1.3509	7.21249	1.76684e-08	1.56247e-06	isocitrate dehydrogenase 3 (NAD+) alpha
1435339_at	KCTD15	1.6163	6.96017	1.77228e-08	1.56368e-06	potassium channel tetramerisation domain containing 15
1422407_s_at	HRAS	1.34008	7.78574	1.77513e-08	1.56368e-06	v-Ha-ras Harvey rat sarcoma viral oncogene homolog
1417409_at	JUN	-1.6484	6.97356	1.79003e-08	1.57091e-06	Jun oncogene
1415772_at	NCL	1.42971	9.64278	1.7903e-08	1.57091e-06	nucleolin
1433398_at	FGD3	-1.55519	8.69307	1.79536e-08	1.57228e-06	FYVE, RhoGEF and PH domain containing 3
1429268_at	2610318N02RIK	1.44361	7.57867	1.81238e-08	1.58411e-06	RIKEN cDNA 2610318N02 gene
1422573_at	AMPD3	-1.38974	8.45601	1.8173e-08	1.58534e-06	AMP deaminase 3
1455487_at	2600014M03RIK	-1.30866	8.0762	1.84163e-08	1.60346e-06	RIKEN cDNA 2600014M03 gene
1436865_at	SLC26A11	-1.75655	7.31051	1.85227e-08	1.60962e-06	solute carrier family 26, member 11
1426485_at	UBXD2	-1.65559	11.4151	1.86725e-08	1.61952e-06	UBX domain containing 2
1436037_at	CERKL	-1.45393	10.0861	1.87692e-08	1.6224e-06	ceramide kinase-like
1428409_at	NAT12	1.33808	11.4808	1.87777e-08	1.6224e-06	N-acetyltransferase 12
1452414_s_at	CCDC86	1.50838	7.73185	1.90523e-08	1.64194e-06	coiled-coil domain containing 86
1434745_at	CCND2	1.35652	11.337	1.90767e-08	1.64194e-06	cyclin D2
1416890_at	WDR74	1.35042	9.4089	1.91513e-08	1.64256e-06	WD repeat domain 74
1416335_at	MIF	1.27911	11.7556	1.91895e-08	1.64256e-06	macrophage migration inhibitory factor
1418888_a_at	SEPX1	-1.74698	9.09399	1.91931e-08	1.64256e-06	selenoprotein X 1
1423796_at	SFPQ	1.29946	8.46044	1.93636e-08	1.65073e-06	splicing factor proline/glutamine rich (polypyrimidine tract binding protein associated)
1433502_s_at	TSR1	1.24921	8.33004	1.93934e-08	1.65073e-06	TSR1, 20S rRNA accumulation, homolog (yeast)
1428315_at	EBNA1BP2	1.29394	9.62689	1.93984e-08	1.65073e-06	EBNA1 binding protein 2
1440205_at	---	1.31673	6.84055	1.95047e-08	1.65341e-06	---
1418996_a_at	4930469P12RIK	-1.30772	10.0817	1.95052e-08	1.65341e-06	RIKEN cDNA 4930469P12 gene
1454728_s_at	ATP8A1	-1.254	8.68526	1.95398e-08	1.65341e-06	ATPase, aminophospholipid transporter (APLT), class I, type 8A, member 1
1425830_a_at	2810452K22RIK /// LOC640972	1.19821	8.42242	1.96579e-08	1.66028e-06	RIKEN cDNA 2810452K22 gene /// similar to cyclin-dependent kinase 2-interacting protein
1428361_x_at	HBA-A1	-1.54543	7.74701	1.97314e-08	1.66338e-06	hemoglobin alpha, adult chain 1
1423700_at	RFC3	1.19042	7.93287	1.981e-08	1.66421e-06	replication factor C (activator 1) 3
1424420_at	CCPG1	-1.4723	8.388	1.9845e-08	1.66421e-06	cell cycle progression 1
1417420_at	CCND1	1.83146	7.36223	1.98884e-08	1.66421e-06	cyclin D1
1416685_s_at	FBL	1.24753	11.3118	1.98963e-08	1.66421e-06	fibrillarin
1416030_a_at	MCM7	1.38385	9.55334	1.99258e-08	1.66421e-06	minichromosome maintenance deficient 7 (S. cerevisiae)
1426603_at	RNASEL	-1.89694	8.80951	2.00449e-08	1.67005e-06	ribonuclease L (2', 5'-oligoisoadenylate synthetase-dependent)
1429294_at	TRIP13	1.4718	7.31067	2.00698e-08	1.67005e-06	thyroid hormone receptor interactor 13
1433593_at	YPEL5	-2.07027	7.65358	2.0123e-08	1.67139e-06	yippee-like 5 (Drosophila)
1454946_at	MYBL2	1.69646	6.46627	2.04057e-08	1.69176e-06	myeloblastosis oncogene-like 2
1424019_at	NOL1	1.57207	8.58587	2.04457e-08	1.69197e-06	nucleolar protein 1
1449874_at	LY96	-1.50482	7.22536	2.05624e-08	1.69851e-06	lymphocyte antigen 96
1436705_at	TMEM32	1.21199	9.08468	2.06388e-08	1.69863e-06	transmembrane protein 32
1418350_at	HBEGF	1.80122	7.24198	2.06985e-08	1.69863e-06	heparin-binding EGF-like growth factor
1424435_a_at	GART	1.56239	8.60255	2.07542e-08	1.69863e-06	phosphoribosylglycinamide formyltransferase
1436456_at	9130023D20RIK	-1.50934	8.08336	2.07768e-08	1.69863e-06	RIKEN cDNA 9130023D20 gene
1441026_at	PARP4	-1.47248	8.08129	2.07998e-08	1.69863e-06	poly (ADP-ribose) polymerase family, member 4
1460035_at	PHB2	1.25431	8.28272	2.09105e-08	1.69863e-06	prohibitin 2
1448604_at	UCK2	1.39177	8.43744	2.09459e-08	1.69863e-06	uridine-cytidine kinase 2
1455558_at	GM114	-1.34513	8.15252	2.09524e-08	1.69863e-06	gene model 114, (NCBI)
1447584_s_at	MYCT1	-1.50427	8.21313	2.09648e-08	1.69863e-06	myc target 1
1449705_x_at	MCM3 /// LOC671904	1.24459	9.29368	2.0967e-08	1.69863e-06	minichromosome maintenance deficient 3 (S. cerevisiae) /// similar to DNA replication licensing factor MCM3 (DNA polymerase alpha holoenzyme-associated protein P1) (P1-MCM3)
1456079_x_at	APEX1	1.36709	10.3551	2.09782e-08	1.69863e-06	apurinic/apyrimidinic endonuclease 1
1429352_at	MOCOS	-1.6501	7.85905	2.10235e-08	1.69925e-06	molybdenum cofactor sulfurase
1438933_x_at	RASGRP2	1.36605	7.06036	2.10718e-08	1.7001e-06	RAS, guanyl releasing protein 2
1419548_at	KPNA1	1.32205	7.97641	2.11682e-08	1.70483e-06	karyopherin (importin) alpha 1
1448307_at	DSCR2	1.19692	9.88068	2.12193e-08	1.70554e-06	Down syndrome critical region homolog 2 (human)
1455827_at	MBNL2	-1.39579	10.1116	2.12526e-08	1.70554e-06	muscleblind-like 2
1455643_s_at	TSR1	1.30339	9.75285	2.13808e-08	1.71278e-06	TSR1, 20S rRNA accumulation, homolog (yeast)
1416581_at	WDR5	1.41468	9.54794	2.14514e-08	1.71539e-06	WD repeat domain 5
1453753_at	DTL	1.40175	7.52166	2.15277e-08	1.71845e-06	denticleless homolog (Drosophila)
1435695_a_at	A030007L17RIK	1.3572	7.51228	2.16237e-08	1.72185e-06	RIKEN cDNA A030007L17 gene
1421278_s_at	LOC630963	-1.27395	9.38806	2.16893e-08	1.72185e-06	similar to spectrin alpha 1
1425142_a_at	HNRPD	1.25722	11.1497	2.17186e-08	1.72185e-06	heterogeneous nuclear ribonucleoprotein D
1450964_a_at	OSBPL9	-1.24714	9.68994	2.17819e-08	1.72185e-06	oxysterol binding protein-like 9
1448559_at	FLOT1	-1.21768	8.38237	2.18041e-08	1.72185e-06	flotillin 1
1437234_x_at	PRMT2	-1.35969	8.24978	2.18214e-08	1.72185e-06	protein arginine N-methyltransferase 2
1419253_at	MTHFD2	1.44443	8.80433	2.18668e-08	1.72185e-06	methylenetetrahydrofolate dehydrogenase (NAD+ dependent), methenyltetrahydrofolate cyclohydrolase
1430332_a_at	GUSB	1.46156	6.80973	2.19045e-08	1.72185e-06	glucuronidase, beta
1417707_at	B230342M21RIK	-1.3312	8.76645	2.19139e-08	1.72185e-06	RIKEN cDNA B230342M21 gene
1426278_at	IFI27	-1.88235	6.39835	2.20916e-08	1.73015e-06	interferon, alpha-inducible protein 27
1424560_at	PSTPIP1	1.52248	8.2455	2.20963e-08	1.73015e-06	proline-serine-threonine phosphatase-interacting protein 1
1418022_at	NARG1	1.26907	9.99884	2.22635e-08	1.74022e-06	NMDA receptor-regulated gene 1
1448318_at	ADFP	-1.2836	10.3392	2.24738e-08	1.75362e-06	adipose differentiation related protein
1451074_at	RNF13	-1.20603	9.47002	2.26193e-08	1.75836e-06	ring finger protein 13
1421187_at	CCR2	-1.49228	6.63096	2.26751e-08	1.75836e-06	chemokine (C-C motif) receptor 2
1424490_at	2410005H09RIK	1.154	6.20332	2.26775e-08	1.75836e-06	RIKEN cDNA 2410005H09 gene
1416755_at	DNAJB1	-1.27127	10.3517	2.26906e-08	1.75836e-06	DnaJ (Hsp40) homolog, subfamily B, member 1
1455181_at	RASA2	1.31073	8.80793	2.27984e-08	1.76369e-06	RAS p21 protein activator 2
1433962_at	6720458F09RIK	1.6892	7.95305	2.29502e-08	1.77071e-06	RIKEN cDNA 6720458F09 gene
1416849_at	D10ERTD214E	1.87388	8.3717	2.2976e-08	1.77071e-06	DNA segment, Chr 10, ERATO Doi 214, expressed
1428970_at	NAT12	1.47639	8.43382	2.30069e-08	1.77071e-06	N-acetyltransferase 12
1448271_a_at	DDX21	1.42744	8.02342	2.31563e-08	1.77917e-06	DEAD (Asp-Glu-Ala-Asp) box polypeptide 21
1427939_s_at	MYCBP	1.61675	7.90046	2.32848e-08	1.78202e-06	c-myc binding protein
1427940_s_at	MYCBP	1.81583	6.53927	2.32946e-08	1.78202e-06	c-myc binding protein
1448698_at	CCND1	1.22253	6.79268	2.33119e-08	1.78202e-06	cyclin D1
1428153_at	MRPS10	1.1662	9.26809	2.33608e-08	1.78273e-06	mitochondrial ribosomal protein S10
1429122_a_at	1700040I03RIK	1.21552	7.9036	2.35408e-08	1.79344e-06	RIKEN cDNA 1700040I03 gene
1454636_at	CBX5	1.64982	9.97709	2.37373e-08	1.80535e-06	chromobox homolog 5 (Drosophila HP1a)
1420028_s_at	MCM3 /// LOC671904	1.28227	10.4699	2.39133e-08	1.81568e-06	minichromosome maintenance deficient 3 (S. cerevisiae) /// similar to DNA replication licensing factor MCM3 (DNA polymerase alpha holoenzyme-associated protein P1) (P1-MCM3)
1435959_at	ARHGAP15	-1.38262	8.21504	2.41268e-08	1.82881e-06	Rho GTPase activating protein 15
1416485_at	TIMM23	1.31001	10.9601	2.43689e-08	1.83548e-06	translocase of inner mitochondrial membrane 23 homolog (yeast)
1418835_at	PHLDA1	-1.94655	7.9922	2.43879e-08	1.83548e-06	pleckstrin homology-like domain, family A, member 1
1439753_x_at	SIX4	-1.81842	5.11715	2.44965e-08	1.83548e-06	sine oculis-related homeobox 4 homolog (Drosophila)
1435452_at	TMEM20	1.36216	8.26819	2.45208e-08	1.83548e-06	transmembrane protein 20
1452351_at	C030027K23RIK /// PARP4	-1.27628	7.93624	2.45623e-08	1.83548e-06	RIKEN cDNA C030027K23 gene /// poly (ADP-ribose) polymerase family, member 4
1448276_at	TSPAN4	1.58983	8.56115	2.45806e-08	1.83548e-06	tetraspanin 4
1422972_s_at	GCN5L2	1.91902	6.74338	2.46111e-08	1.83548e-06	GCN5 general control of amino acid synthesis-like 2 (yeast)
1418580_at	RTP4	-1.9329	5.14697	2.46149e-08	1.83548e-06	receptor transporter protein 4
1426098_a_at	CAST	-1.23504	8.08896	2.46203e-08	1.83548e-06	calpastatin
1449855_s_at	UCHL3 /// UCHL4	1.15056	9.83964	2.46218e-08	1.83548e-06	ubiquitin carboxyl-terminal esterase L3 (ubiquitin thiolesterase) /// ubiquitin carboxyl-terminal esterase L4
1424877_a_at	ALAD	1.32372	8.21347	2.46651e-08	1.83568e-06	aminolevulinate, delta-, dehydratase
1440651_at	DUSP16	-2.04914	5.81069	2.47607e-08	1.83817e-06	Dual specificity phosphatase 16
1437520_a_at	NUP85	1.62242	8.44442	2.47802e-08	1.83817e-06	nucleoporin 85
1452020_a_at	SIVA	1.30357	9.79531	2.48277e-08	1.83868e-06	Cd27 binding protein (Hindu God of destruction)
1417403_at	ELOVL6	1.28984	8.1168	2.48878e-08	1.8401e-06	ELOVL family member 6, elongation of long chain fatty acids (yeast)
1451622_at	LMBRD1	-1.55382	9.35119	2.49729e-08	1.84337e-06	LMBR1 domain containing 1
1434477_at	HECA	-1.3279	8.06008	2.52533e-08	1.86103e-06	headcase homolog (Drosophila)
1434277_a_at	6430570G24	-1.97228	7.78518	2.53452e-08	1.86126e-06	hypothetical protein 6430570G24
1452171_at	GRWD1	1.65305	8.47848	2.53681e-08	1.86126e-06	glutamate-rich WD repeat containing 1
1436454_x_at	FEN1	1.16771	11.1614	2.53803e-08	1.86126e-06	flap structure specific endonuclease 1
1453983_a_at	METT10D	1.26165	8.23159	2.55925e-08	1.87378e-06	methyltransferase 10 domain containing
1423071_x_at	LOC270335 /// LOC434328 /// LOC544983 /// LOC545175 /// LOC619711 /// LOC622782 /// LOC623857 /// LOC624831 /// LOC665837 /// LOC666017 /// LOC666200 /// LOC666464 /// LOC668524 /// LOC670117 /// LOC670242	-1.38612	7.35352	2.5645e-08	1.87391e-06	hypothetical gene supported by BC019681; BC027236 /// hypothetical LOC434328 /// hypothetical LOC544983 /// hypothetical LOC545175 /// hypothetical LOC619711 /// hypothetical LOC622782 /// hypothetical protein LOC623857 /// hypothetical LOC624831 /// hypothetical protein LOC665837 /// hypothetical protein LOC666017 /// hypothetical protein LOC666200 /// hypothetical protein LOC666464 /// hypothet…
1452598_at	GINS4	1.46315	8.87114	2.56774e-08	1.87391e-06	GINS complex subunit 4 (Sld5 homolog)
1436842_at	B230380D07RIK	-1.31065	9.76684	2.57364e-08	1.87518e-06	RIKEN cDNA B230380D07 gene
1418439_at	D10ERTD322E	1.22453	10.1438	2.59497e-08	1.88768e-06	DNA segment, Chr 10, ERATO Doi 322, expressed
1451428_x_at	EGFL7	1.41886	7.24153	2.60298e-08	1.89045e-06	EGF-like domain 7
1417001_a_at	D4WSU53E	-1.5285	10.5976	2.60736e-08	1.89059e-06	DNA segment, Chr 4, Wayne State University 53, expressed
1448907_at	THOP1	1.60655	7.19172	2.61787e-08	1.89516e-06	thimet oligopeptidase 1
1419737_a_at	LDHA	1.25882	11.346	2.63002e-08	1.89931e-06	lactate dehydrogenase A
1436499_at	TMEM23	-1.15267	9.56466	2.6359e-08	1.89931e-06	transmembrane protein 23
1448390_a_at	DHRS3	-1.24007	9.62326	2.63623e-08	1.89931e-06	dehydrogenase/reductase (SDR family) member 3
1453745_at	2700038G22RIK	1.38941	7.54826	2.6419e-08	1.89965e-06	RIKEN cDNA 2700038G22 gene
1423106_at	UBE2B	-1.21063	9.39463	2.64514e-08	1.89965e-06	ubiquitin-conjugating enzyme E2B, RAD6 homology (S. cerevisiae)
1419316_s_at	GNB1L	1.54846	6.3138	2.65369e-08	1.90138e-06	guanine nucleotide binding protein (G protein), beta polypeptide 1-like
1452241_at	TOPBP1	1.19651	10.5217	2.65842e-08	1.90138e-06	topoisomerase (DNA) II beta binding protein
1423705_at	2310057D15RIK	1.36088	7.15034	2.66031e-08	1.90138e-06	RIKEN cDNA 2310057D15 gene
1426609_at	2810028N01RIK	1.48297	9.28033	2.66751e-08	1.90138e-06	RIKEN cDNA 2810028N01 gene
1455173_at	GSPT1	1.24761	8.42233	2.67523e-08	1.90138e-06	G1 to S phase transition 1
1423357_at	2610209A20RIK	2.21557	6.74913	2.67853e-08	1.90138e-06	RIKEN cDNA 2610209A20 gene
1456653_a_at	MTHFD1L	1.39314	9.80611	2.68009e-08	1.90138e-06	methylenetetrahydrofolate dehydrogenase (NADP+ dependent) 1-like
1452231_x_at	IFI203	-2.31133	7.52259	2.68126e-08	1.90138e-06	interferon activated gene 203
1428748_at	5830428H23RIK	-1.49491	7.88634	2.68855e-08	1.90355e-06	RIKEN cDNA 5830428H23 gene
1416014_at	ABCE1	1.37368	9.55466	2.69673e-08	1.90635e-06	ATP-binding cassette, sub-family E (OABP), member 1
1427874_at	ZFP313	-1.15267	8.66206	2.71475e-08	1.91367e-06	zinc finger protein 313
1449603_at	AI594671	-1.71307	2.69453	2.72393e-08	1.91367e-06	expressed sequence AI594671
1422567_at	C1ORF24	-1.38188	8.4708	2.72664e-08	1.91367e-06	chromosome 1 open reading frame 24
1432332_a_at	NUDT19	1.56183	8.26346	2.72779e-08	1.91367e-06	nudix (nucleoside diphosphate linked moiety X)-type motif 19
1434936_at	HIRIP3	1.26013	9.76702	2.73188e-08	1.91367e-06	HIRA interacting protein 3
1434365_a_at	BC055324	1.26982	8.29681	2.73253e-08	1.91367e-06	cDNA sequence BC055324
1433754_at	MBNL2	-1.29636	9.91981	2.76548e-08	1.93219e-06	muscleblind-like 2
1423703_at	PPAN	1.43496	8.28804	2.76755e-08	1.93219e-06	peter pan homolog (Drosophila)
1448325_at	MYD116	-1.30083	8.2	2.78162e-08	1.93901e-06	myeloid differentiation primary response gene 116
1439553_s_at	NUTF2 /// LOC621832 /// LOC668830 /// LOC670887 /// LOC675580	1.2204	10.6133	2.78759e-08	1.94017e-06	nuclear transport factor 2 /// similar to Nuclear transport factor 2 (NTF-2) /// similar to Nuclear transport factor 2 (NTF-2) /// similar to Nuclear transport factor 2 (NTF-2) /// similar to Nuclear transport factor 2 (NTF-2)
1452902_at	2610209N15RIK	1.73374	8.06731	2.79276e-08	1.94077e-06	RIKEN cDNA 2610209N15 gene
1437343_x_at	ATAD3A	1.42414	9.77522	2.80261e-08	1.94462e-06	ATPase family, AAA domain containing 3A
1417233_at	CHCHD4	1.16167	10.1082	2.80968e-08	1.94462e-06	coiled-coil-helix-coiled-coil-helix domain containing 4
1442483_at	FUT8	-1.74506	7.34184	2.81649e-08	1.94462e-06	Fucosyltransferase 8
1452249_at	PRICKLE1	-1.54078	5.39106	2.82068e-08	1.94462e-06	prickle like 1 (Drosophila)
1431734_a_at	DNAJB4	-1.89097	7.26721	2.82375e-08	1.94462e-06	DnaJ (Hsp40) homolog, subfamily B, member 4
1436518_at	USP46	1.27329	8.0991	2.82416e-08	1.94462e-06	Ubiquitin specific peptidase 46
1416972_at	NHP2L1 /// LOC434401 /// LOC637555	1.16701	10.5621	2.84423e-08	1.95545e-06	NHP2 non-histone chromosome protein 2-like 1 (S. cerevisiae) /// similar to Nhp2 non-histone chromosome protein 2-like 1 /// similar to NHP2-like protein 1 (High mobility group-like nuclear protein 2 homolog 1) ([U4/U6.U5] tri-snRNP 15.5 kDa protein) (Sperm specific antigen 1) (Fertilization antigen 1) (FA-1)
1419472_s_at	NUDC /// NUDC-PS1	1.22296	10.7252	2.85402e-08	1.95919e-06	nuclear distribution gene C homolog (Aspergillus) /// nuclear distribution gene C homolog (Aspergillus), pseudogene 1
1454849_x_at	CLU	-1.21763	9.46888	2.86399e-08	1.96305e-06	clusterin
1448200_at	TCN2	-1.39194	8.07035	2.88602e-08	1.97515e-06	transcobalamin 2
1427464_s_at	HSPA5	-1.39097	11.7497	2.90517e-08	1.98524e-06	heat shock 70kD protein 5 (glucose-regulated protein)
1436310_at	GEMIN5	1.25149	7.38494	2.9186e-08	1.9914e-06	gem (nuclear organelle) associated protein 5
1435597_at	C130052G03RIK	1.25528	7.84902	2.94064e-08	2.00031e-06	RIKEN cDNA C130052G03 gene
1418651_at	SPATA6	-1.95839	7.37956	2.94112e-08	2.00031e-06	spermatogenesis associated 6
1460447_at	PUS7L	1.2376	8.27238	2.94496e-08	2.00031e-06	pseudouridylate synthase 7 homolog (S. cerevisiae)-like
1417972_s_at	POP5	1.30423	9.47239	2.98011e-08	2.01918e-06	processing of precursor 5, ribonuclease P/MRP family (S. cerevisiae)
1428390_at	WDR43	1.37082	9.9687	2.98169e-08	2.01918e-06	WD repeat domain 43
1435114_at	WDHD1	1.4348	8.73055	3.00789e-08	2.03306e-06	WD repeat and HMG-box DNA binding protein 1
1436867_at	SRL /// LOC669709	1.38129	6.54265	3.01851e-08	2.03306e-06	sarcalumenin /// similar to sarcalumenin
1454904_at	MTM1	1.40551	8.72648	3.02019e-08	2.03306e-06	X-linked myotubular myopathy gene 1
1417404_at	ELOVL6	1.21514	9.48988	3.02023e-08	2.03306e-06	ELOVL family member 6, elongation of long chain fatty acids (yeast)
1458058_at	7030407E18RIK	-1.12601	6.03314	3.02752e-08	2.03494e-06	RIKEN cDNA 7030407E18 gene
1453359_at	EXOSC1	1.25902	6.10851	3.04302e-08	2.04117e-06	exosome component 1
1448148_at	GRN	-1.29825	10.54	3.04584e-08	2.04117e-06	granulin
1452087_at	EPSTI1	-1.12085	9.31837	3.07402e-08	2.05699e-06	epithelial stromal interaction 1 (breast)
1450510_a_at	CACNA1A	1.49336	5.5594	3.08779e-08	2.06315e-06	calcium channel, voltage-dependent, P/Q type, alpha 1A subunit
1421089_a_at	2610028A01RIK	1.4355	7.27868	3.09722e-08	2.06352e-06	RIKEN cDNA 2610028A01 gene
1440193_at	ANKRD12	-1.4936	8.78751	3.09751e-08	2.06352e-06	ankyrin repeat domain 12
1440481_at	STAT1	-1.52575	6.10412	3.109e-08	2.06812e-06	signal transducer and activator of transcription 1
1454654_at	DIRC2	-1.55708	6.17378	3.12679e-08	2.07571e-06	disrupted in renal carcinoma 2 (human)
1424274_at	VDP	-1.22217	10.1537	3.1296e-08	2.07571e-06	vesicle docking protein
1420123_at	TCTA	-1.80949	7.93443	3.15858e-08	2.08886e-06	T-cell leukemia translocation altered gene
1451385_at	2310056P07RIK	1.11152	10.5403	3.1587e-08	2.08886e-06	RIKEN cDNA 2310056P07 gene
1431349_at	HNRPAB	1.52706	5.55093	3.18048e-08	2.10018e-06	heterogeneous nuclear ribonucleoprotein A/B
1449576_at	EIF1AY	1.33444	7.85633	3.19211e-08	2.10479e-06	eukaryotic translation initiation factor 1A, Y-linked
1424436_at	GART	1.80493	8.99355	3.21378e-08	2.11598e-06	phosphoribosylglycinamide formyltransferase
1417080_a_at	ECSIT	1.50247	7.05262	3.22118e-08	2.11776e-06	ECSIT homolog (Drosophila)
1422479_at	ACSS2	-1.31118	8.51786	3.23874e-08	2.12409e-06	acyl-CoA synthetase short-chain family member 2
1415914_at	HNRPAB	1.23741	11.95	3.24404e-08	2.12409e-06	heterogeneous nuclear ribonucleoprotein A/B
1448563_at	PHB	1.57811	7.83345	3.24493e-08	2.12409e-06	prohibitin
1449018_at	PFN1	1.17111	11.9493	3.25928e-08	2.12589e-06	profilin 1
1450416_at	CBX5	1.2939	7.2601	3.26026e-08	2.12589e-06	chromobox homolog 5 (Drosophila HP1a)
1417541_at	HELLS	1.31327	10.0658	3.26183e-08	2.12589e-06	helicase, lymphoid specific
1417254_at	SPATA5	1.37215	7.12484	3.31236e-08	2.15417e-06	spermatogenesis associated 5
1423767_at	2810410M20RIK	1.15709	10.422	3.31476e-08	2.15417e-06	RIKEN cDNA 2810410M20 gene
1433576_at	MAT2A	1.23677	9.21652	3.32706e-08	2.15905e-06	methionine adenosyltransferase II, alpha
1460209_at	USP39	1.12391	9.2888	3.34491e-08	2.16751e-06	ubiquitin specific peptidase 39
1420760_s_at	NDRL	-1.21372	9.98444	3.36237e-08	2.17555e-06	N-myc downstream regulated-like
1421052_a_at	SMS /// LOC671878	1.13814	10.225	3.36696e-08	2.17555e-06	spermine synthase /// similar to Spermine synthase (Spermidine aminopropyltransferase) (SPMSY)
1434380_at	9830147J24RIK	-1.18497	9.17282	3.38115e-08	2.18159e-06	RIKEN cDNA 9830147J24 gene
1422628_at	4632417K18RIK	1.14187	10.6834	3.39955e-08	2.18667e-06	RIKEN cDNA 4632417K18 gene
1437187_at	E2F7	1.59737	8.37364	3.40308e-08	2.18667e-06	E2F transcription factor 7
1434287_at	AGPAT5	1.25355	8.30554	3.40357e-08	2.18667e-06	1-acylglycerol-3-phosphate O-acyltransferase 5 (lysophosphatidic acid acyltransferase, epsilon)
1424001_at	MKI67IP	1.2069	9.62607	3.40861e-08	2.1868e-06	Mki67 (FHA domain) interacting nucleolar phosphoprotein
1437186_at	BC055324	1.18688	8.13113	3.41797e-08	2.18969e-06	cDNA sequence BC055324
1446930_at	RUNX1	-2.19126	6.68122	3.43785e-08	2.1993e-06	Runt related transcription factor 1
1448543_at	2310042G06RIK	1.34661	8.01425	3.47074e-08	2.21613e-06	RIKEN cDNA 2310042G06 gene
1455084_x_at	SHMT2	1.35631	9.66153	3.47937e-08	2.21613e-06	serine hydroxymethyl transferase 2 (mitochondrial)
1439477_at	UBE2B	-1.42914	8.95193	3.48386e-08	2.21613e-06	ubiquitin-conjugating enzyme E2B, RAD6 homology (S. cerevisiae)
1449470_at	DLX1	1.3353	7.80212	3.48886e-08	2.21613e-06	distal-less homeobox 1
1448132_at	SLC19A1	1.31767	7.82529	3.49249e-08	2.21613e-06	solute carrier family 19 (sodium/hydrogen exchanger), member 1
1453849_s_at	HNRPAB	1.53832	10.8189	3.49364e-08	2.21613e-06	heterogeneous nuclear ribonucleoprotein A/B
1449349_at	NUDT1	1.29276	9.00738	3.50872e-08	2.22001e-06	nudix (nucleoside diphosphate linked moiety X)-type motif 1
1425374_at	OAS3	-1.87855	6.58352	3.50961e-08	2.22001e-06	2'-5' oligoadenylate synthetase 3
1449194_at	MRPS25	1.32702	8.95478	3.54202e-08	2.23737e-06	mitochondrial ribosomal protein S25
1426630_at	EXOSC2	1.24337	8.19461	3.56418e-08	2.24719e-06	exosome component 2
1422993_s_at	THOC4 /// REFBP2	1.153	9.59344	3.57258e-08	2.24719e-06	THO complex 4 /// RNA and export factor binding protein 2
1455476_a_at	GSE1	-1.18337	8.41767	3.58243e-08	2.24719e-06	genetic suppressor element 1
1423570_at	ABCG1	-1.16977	8.95398	3.58735e-08	2.24719e-06	ATP-binding cassette, sub-family G (WHITE), member 1
1422440_at	CDK4 /// LOC640611	1.28605	9.31214	3.59005e-08	2.24719e-06	cyclin-dependent kinase 4 /// similar to Cell division protein kinase 4 (Cyclin-dependent kinase 4) (PSK-J3) (CRK3)
1457266_at	AW322671	-1.49885	8.56765	3.59208e-08	2.24719e-06	expressed sequence AW322671
1416071_at	DDX18	1.12099	9.68834	3.59686e-08	2.24719e-06	DEAD (Asp-Glu-Ala-Asp) box polypeptide 18
1424991_s_at	TYMS /// TYMS-PS	1.4632	9.40372	3.59741e-08	2.24719e-06	thymidylate synthase /// thymidylate synthase, pseudogene
1439857_at	USP32	-1.21205	7.39502	3.627e-08	2.26133e-06	Ubiquitin specific peptidase 32
1450967_at	PTPLAD2	-1.4042	8.57234	3.63413e-08	2.26133e-06	protein tyrosine phosphatase-like A domain containing 2
1424151_at	JTV1	1.1723	8.81143	3.6351e-08	2.26133e-06	JTV1 gene
1452923_at	1810058I14RIK	1.11181	7.43055	3.64964e-08	2.26233e-06	RIKEN cDNA 1810058I14 gene
1423306_at	2010002N04RIK	-1.17385	8.87631	3.65063e-08	2.26233e-06	RIKEN cDNA 2010002N04 gene
1437504_at	SLA2	1.37508	7.0128	3.65175e-08	2.26233e-06	Src-like-adaptor 2
1417804_at	RASGRP2	1.29501	7.31594	3.66609e-08	2.2681e-06	RAS, guanyl releasing protein 2
1448346_at	CFL1	1.0864	9.20366	3.67139e-08	2.26827e-06	cofilin 1, non-muscle
1440379_at	SLC1A5	1.34597	6.73984	3.69002e-08	2.27537e-06	solute carrier family 1 (neutral amino acid transporter), member 5
1430778_a_at	NUBP1	1.2069	7.78724	3.69297e-08	2.27537e-06	nucleotide binding protein 1
1430138_at	CD3EAP	1.22988	7.19101	3.70374e-08	2.27823e-06	CD3E antigen, epsilon polypeptide associated protein
1438167_x_at	FLCN	-1.58807	9.36275	3.70773e-08	2.27823e-06	Folliculin
1449019_at	AKAP1	1.21219	8.28672	3.7295e-08	2.2866e-06	A kinase (PRKA) anchor protein 1
1446458_at	RNASEL	-1.40053	6.30925	3.73149e-08	2.2866e-06	ribonuclease L (2', 5'-oligoisoadenylate synthetase-dependent)
1423674_at	USP1	1.38082	9.77641	3.76232e-08	2.29858e-06	ubiquitin specific peptdiase 1
1437458_x_at	CLU	-1.18182	9.15062	3.76592e-08	2.29858e-06	clusterin
1415985_at	SF3B3	1.1621	9.65928	3.76632e-08	2.29858e-06	splicing factor 3b, subunit 3
1424191_a_at	TMEM41A	1.22545	8.42976	3.78813e-08	2.30585e-06	transmembrane protein 41a
1456315_a_at	PTPLA	1.63094	8.70066	3.78846e-08	2.30585e-06	protein tyrosine phosphatase-like (proline instead of catalytic arginine), member a
1424039_at	TMEM66	-1.3782	10.3254	3.79434e-08	2.30631e-06	transmembrane protein 66
1451306_at	CDCA7L	1.30169	8.66861	3.80762e-08	2.3106e-06	cell division cycle associated 7 like
1424514_at	RNF126	1.13734	8.93792	3.81163e-08	2.3106e-06	ring finger protein 126
1437715_x_at	APEX1	1.28195	11.0935	3.83423e-08	2.3203e-06	apurinic/apyrimidinic endonuclease 1
1455975_x_at	ZFP313	-1.1726	10.3776	3.83793e-08	2.3203e-06	zinc finger protein 313
1419522_at	ZMYND19	2.12746	7.39987	3.84858e-08	2.32362e-06	zinc finger, MYND domain containing 19
1421184_a_at	METTL7A /// UBIE /// LOC554292	-1.30038	7.85131	3.86013e-08	2.32717e-06	methyltransferase like 7A /// UbiE-YGHL1 fusion protein /// UbiE-YGHL1 fusion protein
1460608_at	CACNA1B	-2.46993	4.34154	3.86505e-08	2.32717e-06	calcium channel, voltage-dependent, N type, alpha 1B subunit
1451026_at	FTSJ3	1.40519	7.88279	3.87371e-08	2.32717e-06	FtsJ homolog 3 (E. coli)
1421914_s_at	MRPL19	1.12034	9.01703	3.87509e-08	2.32717e-06	mitochondrial ribosomal protein L19
1415754_at	POLR2F	1.15822	9.95531	3.88822e-08	2.33053e-06	polymerase (RNA) II (DNA directed) polypeptide F
1423211_at	NOLA3	1.36278	11.1123	3.89294e-08	2.33053e-06	nucleolar protein family A, member 3
1425617_at	DHX9	1.30181	8.4289	3.89648e-08	2.33053e-06	DEAH (Asp-Glu-Ala-His) box polypeptide 9
1426448_at	PJA1	1.10757	8.36878	3.90135e-08	2.33053e-06	praja1, RING-H2 motif containing
1428254_at	PURB	1.14702	8.93995	3.92997e-08	2.34292e-06	purine rich element binding protein B
1418280_at	KLF6	-1.72767	9.3909	3.93615e-08	2.34292e-06	Kruppel-like factor 6
1426653_at	MCM3	1.54563	8.06584	3.93831e-08	2.34292e-06	minichromosome maintenance deficient 3 (S. cerevisiae)
1453202_at	E330016A19RIK	1.23809	8.22259	3.94457e-08	2.34292e-06	RIKEN cDNA E330016A19 gene
1457825_x_at	TCN2	-1.60786	8.42492	3.94868e-08	2.34292e-06	transcobalamin 2
1437017_at	AI480653	1.71357	7.75017	3.95684e-08	2.34292e-06	expressed sequence AI480653
1426716_at	TDRD7	-1.63496	7.68165	3.95847e-08	2.34292e-06	tudor domain containing 7
1421082_s_at	BANF1	1.0833	11.308	3.97636e-08	2.34754e-06	barrier to autointegration factor 1
1451895_a_at	DHCR24	1.21112	9.45963	3.97668e-08	2.34754e-06	24-dehydrocholesterol reductase
1418024_at	NARG1	1.20894	10.1264	3.98337e-08	2.34842e-06	NMDA receptor-regulated gene 1
1428506_at	ATIC	1.15048	10.1504	3.99889e-08	2.35449e-06	5-aminoimidazole-4-carboxamide ribonucleotide formyltransferase/IMP cyclohydrolase
1418079_at	PSME3	1.75647	7.38405	4.03403e-08	2.37208e-06	proteaseome (prosome, macropain) 28 subunit, 3
1435325_at	USP46	1.35563	8.01651	4.04718e-08	2.37672e-06	ubiquitin specific peptidase 46
1420494_x_at	UBC	-1.3567	12.2525	4.05356e-08	2.37737e-06	ubiquitin C
1428106_at	1300001I01RIK	1.4146	8.4122	4.06549e-08	2.38127e-06	RIKEN cDNA 1300001I01 gene
1451462_a_at	IFNAR2	-1.08312	10.1048	4.07757e-08	2.38525e-06	interferon (alpha and beta) receptor 2
1418578_at	DGKA	-1.29598	7.68996	4.09637e-08	2.38838e-06	diacylglycerol kinase, alpha
1436033_at	BC031353	-1.49688	6.9592	4.0968e-08	2.38838e-06	cDNA sequence BC031353
1441960_x_at	5730494M16RIK	1.49962	7.99214	4.09881e-08	2.38838e-06	RIKEN cDNA 5730494M16 gene
1452226_at	RCC2	1.21168	8.44603	4.10757e-08	2.38978e-06	regulator of chromosome condensation 2
1459718_x_at	KLF6	-1.50536	5.34249	4.11182e-08	2.38978e-06	Kruppel-like factor 6
1429488_at	ZDHHC21	1.14227	8.3687	4.13852e-08	2.40116e-06	zinc finger, DHHC domain containing 21
1416935_at	TRPV2	-1.22416	8.83433	4.14629e-08	2.40116e-06	transient receptor potential cation channel, subfamily V, member 2
1415928_a_at	MAP1LC3B	-1.20521	11.6671	4.14736e-08	2.40116e-06	microtubule-associated protein 1 light chain 3 beta
1452681_at	DTYMK	1.25211	9.98344	4.15512e-08	2.40257e-06	deoxythymidylate kinase
1451378_at	UTP6	1.32118	6.21383	4.16967e-08	2.40789e-06	UTP6, small subunit (SSU) processome component, homolog (yeast)
1428341_at	ZFP655	-1.24889	9.14764	4.1877e-08	2.41304e-06	zinc finger protein 655
1436585_at	BB182297	1.39304	6.16854	4.18928e-08	2.41304e-06	expressed sequence BB182297
1450034_at	STAT1	-1.09189	9.01394	4.19855e-08	2.41424e-06	signal transducer and activator of transcription 1
1459712_at	ZNF182	-1.77247	4.13076	4.20207e-08	2.41424e-06	zinc finger protein 182
1430663_at	9430037O13RIK	1.44189	7.42625	4.21751e-08	2.42002e-06	RIKEN cDNA 9430037O13 gene
1437067_at	PHTF2	1.38265	8.72381	4.23988e-08	2.42813e-06	putative homeodomain transcription factor 2
1417423_at	GRINA	-1.28694	9.96966	4.25114e-08	2.42813e-06	glutamate receptor, ionotropic, N-methyl D-asparate-associated protein 1 (glutamate binding)
1428244_at	LARP1 /// LOC631268	1.09857	9.95122	4.25292e-08	2.42813e-06	La ribonucleoprotein domain family, member 1 /// similar to la related protein isoform 1
1434846_at	1700065A05RIK	-1.40746	8.97011	4.25824e-08	2.42813e-06	RIKEN cDNA 1700065A05 gene
1426542_at	ENDOD1	1.36904	6.80345	4.25855e-08	2.42813e-06	endonuclease domain containing 1
1448620_at	FCGR3A	-1.41888	8.1193	4.26463e-08	2.42853e-06	Fc fragment of IgG, low affinity IIIa, receptor (CD16a)
1419481_at	SELL	1.08482	11.6203	4.28483e-08	2.43695e-06	selectin, lymphocyte
1429947_a_at	ZBP1	-1.61543	5.34092	4.29171e-08	2.43779e-06	Z-DNA binding protein 1
1424164_at	MRPL50	1.0972	8.74117	4.31193e-08	2.44194e-06	mitochondrial ribosomal protein L50
1418495_at	ZC3H8	1.38394	6.73147	4.31199e-08	2.44194e-06	zinc finger CCCH type containing 8
1418572_x_at	TNFRSF12A	1.27943	7.32491	4.31526e-08	2.44194e-06	tumor necrosis factor receptor superfamily, member 12a
1453149_at	SLC25A32	1.453	7.62661	4.32347e-08	2.44352e-06	solute carrier family 25, member 32
1449047_at	HACL1	-1.32382	7.64291	4.38677e-08	2.4755e-06	2-hydroxyacyl-CoA lyase 1
1455904_at	GAS5	1.16771	9.95695	4.39103e-08	2.4755e-06	growth arrest specific 5
1435000_at	GSPT1	1.13883	8.76779	4.40587e-08	2.48046e-06	G1 to S phase transition 1
1417619_at	GADD45GIP1	1.30432	7.11858	4.42102e-08	2.48046e-06	growth arrest and DNA-damage-inducible, gamma interacting protein 1
1426674_at	EIF3S9	1.11171	9.97504	4.42247e-08	2.48046e-06	eukaryotic translation initiation factor 3, subunit 9 (eta)
1418650_at	SPATA6	-1.19741	6.52772	4.42591e-08	2.48046e-06	spermatogenesis associated 6
1416827_at	TBXAS1	-1.12766	8.12752	4.42732e-08	2.48046e-06	thromboxane A synthase 1, platelet
1436841_at	B230380D07RIK	-1.2409	9.36764	4.45316e-08	2.49183e-06	RIKEN cDNA B230380D07 gene
1427282_a_at	FXN	1.66115	8.23713	4.46807e-08	2.49708e-06	frataxin
1448365_at	EXOSC7	1.07777	9.73739	4.48557e-08	2.50376e-06	exosome component 7
1416416_x_at	GSTM1	-2.22782	8.52103	4.49464e-08	2.50572e-06	glutathione S-transferase, mu 1
1448118_a_at	CTSD	-1.28587	10.4589	4.51104e-08	2.51176e-06	cathepsin D
1428635_at	COMTD1	1.08087	7.93592	4.53088e-08	2.51851e-06	catechol-O-methyltransferase domain containing 1
1451722_s_at	SMYD5	1.12856	7.6516	4.53433e-08	2.51851e-06	SET and MYND domain containing 5
1419641_at	PURB	1.16235	9.26681	4.55666e-08	2.5278e-06	purine rich element binding protein B
1443673_x_at	---	-1.2611	9.21933	4.61108e-08	2.55484e-06	---
1446269_at	HBP1	-1.74766	6.54858	4.62216e-08	2.55784e-06	high mobility group box transcription factor 1
1438764_at	ANXA7	-1.58116	8.05457	4.63933e-08	2.5642e-06	annexin A7
1457020_at	GPBP1L1	-1.09323	8.65813	4.6456e-08	2.56452e-06	GC-rich promoter binding protein 1-like 1
1423107_at	UBE2B	-1.38871	10.9877	4.69544e-08	2.58591e-06	ubiquitin-conjugating enzyme E2B, RAD6 homology (S. cerevisiae)
1426657_s_at	PHGDH /// LOC666422 /// LOC666875 /// LOC669985 /// LOC671102 /// LOC673015 /// LOC675010	1.35792	8.23931	4.69885e-08	2.58591e-06	3-phosphoglycerate dehydrogenase /// similar to 3-phosphoglycerate dehydrogenase /// similar to 3-phosphoglycerate dehydrogenase /// similar to 3-phosphoglycerate dehydrogenase /// similar to 3-phosphoglycerate dehydrogenase /// similar to 3-phosphoglycerate dehydrogenase /// similar to 3-phosphoglycerate dehydrogenase
1450111_a_at	NUDT8	1.43873	7.60552	4.70642e-08	2.58591e-06	nudix (nucleoside diphosphate linked moiety X)-type motif 8
1435357_at	---	-1.26917	8.58692	4.70728e-08	2.58591e-06	---
1417407_at	FBXL14	1.05852	8.01041	4.72982e-08	2.59513e-06	F-box and leucine-rich repeat protein 14
1447854_s_at	HIST2H2BE	-1.26346	8.53939	4.7512e-08	2.6011e-06	histone 2, H2be
1416125_at	FKBP5	1.17399	8.98925	4.75908e-08	2.6011e-06	FK506 binding protein 5
1437437_x_at	DNPEP	-1.11097	10.155	4.75934e-08	2.6011e-06	aspartyl aminopeptidase
1438516_at	RIF1	1.28862	7.18838	4.76378e-08	2.6011e-06	Rap1 interacting factor 1 homolog (yeast)
1435198_at	LOC545228	-1.65035	6.87367	4.76997e-08	2.60134e-06	hypothetical protein LOC545228
1419637_s_at	4833420G17RIK	-1.06892	9.0036	4.79904e-08	2.61223e-06	RIKEN cDNA 4833420G17 gene
1435104_at	D130004H04RIK	1.29041	8.16035	4.80153e-08	2.61223e-06	RIKEN cDNA D130004H04 gene
1423334_at	1200007D18RIK	1.34046	6.35401	4.81435e-08	2.61605e-06	RIKEN cDNA 1200007D18 gene
1452001_at	NFE2	-1.1846	9.29196	4.82195e-08	2.61703e-06	nuclear factor, erythroid derived 2
1453479_at	1700086P04RIK	-1.24967	6.63924	4.83883e-08	2.62157e-06	RIKEN cDNA 1700086P04 gene
1448844_at	CYB5B	1.28062	8.93239	4.84479e-08	2.62157e-06	cytochrome b5 type B
1423210_a_at	NOLA3	1.18407	12.0395	4.84807e-08	2.62157e-06	nucleolar protein family A, member 3
1421992_a_at	IGFBP4	1.13504	8.81476	4.85358e-08	2.62157e-06	insulin-like growth factor binding protein 4
1452186_at	RBM5	-1.09556	10.2042	4.85954e-08	2.62165e-06	RNA binding motif protein 5
1437985_a_at	2310061I04RIK	1.15767	8.0666	4.91405e-08	2.64454e-06	RIKEN cDNA 2310061I04 gene
1418359_at	WBSCR27	-1.38902	8.01619	4.91568e-08	2.64454e-06	Williams Beuren syndrome chromosome region 27 (human)
1437121_at	DENND1C	-1.23139	6.90887	4.91956e-08	2.64454e-06	DENN/MADD domain containing 1C
1448270_at	DDX21	1.64456	9.81727	4.93551e-08	2.64996e-06	DEAD (Asp-Glu-Ala-Asp) box polypeptide 21
1416395_at	GUK1	1.17291	8.51421	4.95446e-08	2.6542e-06	guanylate kinase 1
1434544_at	BOLA2	1.07191	9.23572	4.95518e-08	2.6542e-06	bolA-like 2 (E. coli)
1416527_at	RAB32	-1.20708	8.95377	4.96447e-08	2.65602e-06	RAB32, member RAS oncogene family
1457083_at	PRPF31	1.15676	7.36133	4.98101e-08	2.66171e-06	PRP31 pre-mRNA processing factor 31 homolog (yeast)
1430515_s_at	AASDHPPT	1.04189	9.53201	4.99247e-08	2.66468e-06	aminoadipate-semialdehyde dehydrogenase-phosphopantetheinyl transferase
1425974_a_at	TRIM25	-1.07597	10.4044	5.00782e-08	2.66971e-06	tripartite motif protein 25
1426952_at	ARHGAP18	-1.3239	7.8096	5.03164e-08	2.67695e-06	Rho GTPase activating protein 18
1437632_at	---	1.3516	9.05336	5.03437e-08	2.67695e-06	Adult male cecum cDNA, RIKEN full-length enriched library, clone:9130409M07 product:hypothetical protein, full insert sequence
1429418_at	CDC14B	-1.14928	6.58145	5.04651e-08	2.67695e-06	CDC14 cell division cycle 14 homolog B (S. cerevisiae)
1424339_at	OASL1	-2.96132	7.53702	5.05484e-08	2.67695e-06	2'-5' oligoadenylate synthetase-like 1
1426402_at	SYNCRIP	1.11053	10.1811	5.058e-08	2.67695e-06	synaptotagmin binding, cytoplasmic RNA interacting protein
1460192_at	OSBPL1A	-1.10557	8.71018	5.06289e-08	2.67695e-06	oxysterol binding protein-like 1A
1417724_at	THOC4	1.15114	9.85266	5.06294e-08	2.67695e-06	THO complex 4
1448292_at	UQCR	1.07859	10.4793	5.07278e-08	2.67696e-06	ubiquinol-cytochrome c reductase (6.4kD) subunit
1416015_s_at	ABCE1	1.27619	9.94528	5.07483e-08	2.67696e-06	ATP-binding cassette, sub-family E (OABP), member 1
1429491_s_at	RIF1 /// LOC671598	1.07228	10.0263	5.10392e-08	2.686e-06	Rap1 interacting factor 1 homolog (yeast) /// similar to Telomere-associated protein RIF1 (Rap1-interacting factor 1 homolog) (mRif1)
1424227_at	POLR3H	1.32261	8.05998	5.10464e-08	2.686e-06	polymerase (RNA) III (DNA directed) polypeptide H
1442704_at	BAZ2B	-1.20918	6.73767	5.11561e-08	2.686e-06	Bromodomain adjacent to zinc finger domain, 2B
1424170_at	PHF5A	1.03667	9.25098	5.11579e-08	2.686e-06	PHD finger protein 5A
1450276_a_at	SCIN	-1.06639	11.9362	5.12992e-08	2.68766e-06	scinderin
1416106_at	KTI12	1.102	9.18217	5.13088e-08	2.68766e-06	KTI12 homolog, chromatin associated (S. cerevisiae)
1429778_at	OPTN	-1.47719	6.59281	5.14445e-08	2.69165e-06	optineurin
1416349_at	MRPL34	1.1781	8.93928	5.15585e-08	2.69437e-06	mitochondrial ribosomal protein L34
1448651_at	NUDT5	1.258	9.62198	5.1616e-08	2.69437e-06	nudix (nucleoside diphosphate linked moiety X)-type motif 5
1426739_at	DONSON	1.17738	8.24868	5.18058e-08	2.70115e-06	downstream neighbor of SON
1435017_at	MEL13	1.13428	9.6981	5.18942e-08	2.70118e-06	melanoma nuclear protein 13
1425156_at	9830147J24RIK	-1.35508	9.02091	5.20433e-08	2.70118e-06	RIKEN cDNA 9830147J24 gene
1423220_at	EIF4E /// LOC630527	1.19323	9.22422	5.20556e-08	2.70118e-06	eukaryotic translation initiation factor 4E /// hypothetical LOC630527
1441965_at	CCDC38	-1.95549	7.47773	5.20692e-08	2.70118e-06	coiled-coil domain containing 38
1426584_a_at	SORD	-1.26357	7.71487	5.21232e-08	2.70118e-06	sorbitol dehydrogenase
1437007_x_at	USP39	1.03376	10.8778	5.21657e-08	2.70118e-06	ubiquitin specific peptidase 39
1434193_at	ZMYM6	-1.39258	8.10684	5.22558e-08	2.70274e-06	zinc finger, MYM-type 6
1429562_at	5031415C07RIK	-1.22936	6.21865	5.2383e-08	2.70622e-06	RIKEN cDNA 5031415C07 gene
1460446_at	WRB	1.29281	7.85022	5.27936e-08	2.72431e-06	tryptophan rich basic protein
1422653_at	CEP70	-1.17225	8.36514	5.30402e-08	2.73391e-06	centrosomal protein 70
1416934_at	MTM1	-1.46124	6.56891	5.31433e-08	2.73609e-06	X-linked myotubular myopathy gene 1
1427270_a_at	BSDC1	-1.368	7.67276	5.3223e-08	2.73707e-06	BSD domain containing 1
1451110_at	EGLN1	1.24981	6.84322	5.33635e-08	2.74117e-06	EGL nine homolog 1 (C. elegans)
1426945_at	RANBP5	1.18783	9.4999	5.35297e-08	2.74658e-06	RAN binding protein 5
1435208_at	DTX3L	-1.29832	8.932	5.388e-08	2.75985e-06	deltex 3-like (Drosophila)
1433796_at	ENDOD1	1.42618	8.25889	5.39214e-08	2.75985e-06	endonuclease domain containing 1
1452811_at	ATIC	1.74654	8.80451	5.39718e-08	2.75985e-06	5-aminoimidazole-4-carboxamide ribonucleotide formyltransferase/IMP cyclohydrolase
1443007_at	GNAS	1.20441	7.67636	5.41602e-08	2.76634e-06	GNAS (guanine nucleotide binding protein, alpha stimulating) complex locus
1452119_at	2600005C20RIK	1.76325	8.16014	5.42783e-08	2.76924e-06	RIKEN cDNA 2600005C20 gene
1422500_at	IDH3A	1.77611	6.18433	5.44493e-08	2.77482e-06	isocitrate dehydrogenase 3 (NAD+) alpha
1454920_at	UHRF2	-1.16043	9.5358	5.46039e-08	2.77956e-06	ubiquitin-like, containing PHD and RING finger domains 2
1439740_s_at	UCK2	1.12735	9.15081	5.48208e-08	2.78645e-06	uridine-cytidine kinase 2
1435169_at	A930001N09RIK	-1.59483	7.61442	5.49065e-08	2.78645e-06	RIKEN cDNA A930001N09 gene
1420558_at	SELP	1.18152	8.01998	5.49246e-08	2.78645e-06	selectin, platelet
1452919_a_at	1700012G19RIK	1.17406	8.11584	5.51336e-08	2.79072e-06	RIKEN cDNA 1700012G19 gene
1428154_s_at	PPAPDC1A	-1.43551	8.4352	5.51527e-08	2.79072e-06	phosphatidic acid phosphatase type 2 domain containing 1A
1449708_s_at	CHEK1	1.24073	8.93921	5.51944e-08	2.79072e-06	checkpoint kinase 1 homolog (S. pombe)
1449023_a_at	EZH1	-1.26826	8.65778	5.55364e-08	2.80487e-06	enhancer of zeste homolog 1 (Drosophila)
1450714_at	AZIN1	1.13211	10.6538	5.56791e-08	2.80548e-06	antizyme inhibitor 1
1416064_a_at	HSPA5	-1.05255	12.8979	5.56858e-08	2.80548e-06	heat shock 70kD protein 5 (glucose-regulated protein)
1431659_at	TMEM86B	-1.93576	5.77355	5.57351e-08	2.80548e-06	transmembrane protein 86B
1452011_a_at	UXS1	1.65328	8.04075	5.58704e-08	2.80789e-06	UDP-glucuronate decarboxylase 1
1446715_at	ABCA13 /// LOC672028	1.29939	5.15924	5.59569e-08	2.80789e-06	ATP-binding cassette, sub-family A (ABC1), member 13 /// similar to ATP binding cassette, sub-family A (ABC1), member 13
1450677_at	CHEK1	1.25072	8.25619	5.59698e-08	2.80789e-06	checkpoint kinase 1 homolog (S. pombe)
1434552_at	WDR77	1.14207	7.45183	5.61545e-08	2.81403e-06	WD repeat domain 77
1451166_a_at	CCDC101	1.16005	9.1659	5.62441e-08	2.81539e-06	coiled-coil domain containing 101
1426897_at	RCC2	1.10713	9.22317	5.6382e-08	2.81734e-06	regulator of chromosome condensation 2
1451148_at	PINK1	-2.19856	6.91324	5.6408e-08	2.81734e-06	PTEN induced putative kinase 1
1452279_at	CFP	1.40416	9.89556	5.6648e-08	2.82362e-06	complement factor properdin
1416750_at	OPRS1	1.39027	7.33782	5.67081e-08	2.82362e-06	opioid receptor, sigma 1
1454120_a_at	PCGF6	1.34289	7.82494	5.67216e-08	2.82362e-06	polycomb group ring finger 6
1455246_at	SMARCC1	1.03776	9.53036	5.68104e-08	2.82493e-06	SWI/SNF related, matrix associated, actin dependent regulator of chromatin, subfamily c, member 1
1434383_at	PJA2	-1.05244	8.72098	5.69836e-08	2.83041e-06	praja 2, RING-H2 motif containing
1457376_at	ITGA4	-1.98383	7.99634	5.72156e-08	2.83757e-06	Integrin alpha 4
1456396_at	---	1.17399	9.16332	5.72534e-08	2.83757e-06	---
1416442_at	IER2	1.04493	8.97053	5.7341e-08	2.83879e-06	immediate early response 2
1427691_a_at	IFNAR2	-1.78991	8.57206	5.75611e-08	2.84656e-06	interferon (alpha and beta) receptor 2
1436994_a_at	HIST1H1C	-2.29238	9.90328	5.76592e-08	2.84667e-06	histone 1, H1c
1436352_at	CEP78	1.22275	6.82144	5.76895e-08	2.84667e-06	centrosomal protein 78
1423617_at	COG8	1.21936	8.28605	5.79025e-08	2.85126e-06	component of oligomeric golgi complex 8
1438096_a_at	DTYMK	1.07854	10.6882	5.7909e-08	2.85126e-06	deoxythymidylate kinase
1428405_at	HCFC1R1	-1.12144	9.05998	5.80633e-08	2.85276e-06	host cell factor C1 regulator 1 (XPO1-dependent)
1430135_at	DNASE2	-1.79149	6.12561	5.8066e-08	2.85276e-06	deoxyribonuclease II, lysosomal
1415948_at	CREG1	-1.32408	11.5756	5.82977e-08	2.85777e-06	cellular repressor of E1A-stimulated genes 1
1428553_at	GLRX5	1.04737	11.3298	5.83395e-08	2.85777e-06	glutaredoxin 5 homolog (S. cerevisiae)
1426496_at	WDR55	1.22725	7.33566	5.8358e-08	2.85777e-06	WD repeat domain 55
1451672_at	GRK6	1.11418	7.75421	5.8723e-08	2.87252e-06	G protein-coupled receptor kinase 6
1459983_at	IMPA2	1.25842	7.37758	5.89076e-08	2.87656e-06	inositol (myo)-1(or 4)-monophosphatase 2
1435057_x_at	POLR1E	1.13594	7.15608	5.89356e-08	2.87656e-06	polymerase (RNA) I polypeptide E
1417035_at	SAC3D1	1.31104	7.42712	5.89968e-08	2.87656e-06	SAC3 domain containing 1
1417612_at	IER5	-1.18333	7.84664	5.92177e-08	2.88421e-06	immediate early response 5
1450966_at	CROT	-1.2278	8.70233	5.94692e-08	2.8873e-06	carnitine O-octanoyltransferase
1428389_s_at	WDR43	1.17247	9.29261	5.95404e-08	2.8873e-06	WD repeat domain 43
1452694_at	IHPK1	-1.29208	9.07753	5.9551e-08	2.8873e-06	inositol hexaphosphate kinase 1
1417734_at	AKAP8L	-1.24633	7.61491	5.9627e-08	2.8873e-06	A kinase (PRKA) anchor protein 8-like
1434233_at	2610030H06RIK	1.34382	6.65919	5.96327e-08	2.8873e-06	RIKEN cDNA 2610030H06 gene
1428791_at	UBE2H	-1.86418	6.71928	5.96653e-08	2.8873e-06	ubiquitin-conjugating enzyme E2H
1446693_at	---	-1.26839	6.74159	5.9745e-08	2.8879e-06	---
1422967_a_at	TFRC	1.64267	6.75484	5.9864e-08	2.8879e-06	transferrin receptor
1444021_at	SQSTM1	-1.7355	6.2711	5.98745e-08	2.8879e-06	sequestosome 1
1449623_at	TXNRD3	1.18474	7.57322	5.99339e-08	2.8879e-06	thioredoxin reductase 3
1438331_at	YPEL2	-1.39908	5.4905	6.02399e-08	2.89734e-06	Yippee-like 2 (Drosophila)
1416629_at	SLC1A5	1.22761	6.7297	6.02844e-08	2.89734e-06	solute carrier family 1 (neutral amino acid transporter), member 5
1452348_s_at	IFI203 /// IFI204 /// LOC192690 /// IFI205 /// MNDA /// LOC640890 /// LOC672547 /// LOC677184	-2.32848	6.08196	6.03224e-08	2.89734e-06	interferon activated gene 203 /// interferon activated gene 204 /// similar to interferon activated gene 205 /// interferon activated gene 205 /// myeloid cell nuclear differentiation antigen /// similar to Interferon-activatable protein 205 (IFI-205) (D3 protein) /// similar to Interferon-activatable protein 204 (Ifi-204) (Interferon-inducible protein p204) /// similar to Interferon-activatable …
1453007_at	3110082I17RIK	1.69542	7.47542	6.04147e-08	2.89868e-06	RIKEN cDNA 3110082I17 gene
1425837_a_at	CCRN4L	1.3198	7.73146	6.06115e-08	2.90504e-06	CCR4 carbon catabolite repression 4-like (S. cerevisiae)
1451884_a_at	LSM2	1.71152	7.02739	6.09196e-08	2.91671e-06	LSM2 homolog, U6 small nuclear RNA associated (S. cerevisiae)
1428798_s_at	0610039J04RIK	1.73718	6.89555	6.1012e-08	2.91803e-06	RIKEN cDNA 0610039J04 gene
1447924_at	NUCKS1	1.10315	7.81077	6.12234e-08	2.92504e-06	nuclear casein kinase and cyclin-dependent kinase substrate 1
1453433_at	2600001A11RIK	1.20178	6.79739	6.16412e-08	2.94188e-06	RIKEN cDNA 2600001A11 gene
1415807_s_at	SFRS2	1.18175	10.0406	6.17786e-08	2.94533e-06	splicing factor, arginine/serine-rich 2 (SC-35)
1448819_at	EIF2S2	1.17594	8.42161	6.18896e-08	2.9475e-06	eukaryotic translation initiation factor 2, subunit 2 (beta)
1430025_at	PPP3CC	1.18466	6.80382	6.20219e-08	2.94946e-06	protein phosphatase 3, catalytic subunit, gamma isoform
1450866_a_at	MRPL17	1.04066	9.97109	6.2099e-08	2.94946e-06	mitochondrial ribosomal protein L17
1449010_at	HSPA4L	-1.36011	8.39562	6.2127e-08	2.94946e-06	heat shock protein 4 like
1454961_at	SYNJ1	-1.06109	9.95211	6.2224e-08	2.95096e-06	synaptojanin 1
1416152_a_at	SFRS3	1.23684	9.01299	6.25575e-08	2.96331e-06	splicing factor, arginine/serine-rich 3 (SRp20)
1422155_at	HIST2H3C2	-1.76816	4.54509	6.2638e-08	2.96331e-06	histone 2, H3c2
1418078_at	PSME3	1.61969	7.23039	6.26815e-08	2.96331e-06	proteaseome (prosome, macropain) 28 subunit, 3
1435605_at	ACTR3B	1.42466	7.25762	6.30763e-08	2.97885e-06	ARP3 actin-related protein 3 homolog B (yeast)
1437128_a_at	A630033E08RIK	-1.91266	8.54506	6.33533e-08	2.98586e-06	RIKEN cDNA A630033E08 gene
1416060_at	TBC1D15	-1.12944	10.8485	6.3357e-08	2.98586e-06	TBC1 domain family, member 15
1416070_a_at	DDX18	1.14649	9.18411	6.34843e-08	2.98873e-06	DEAD (Asp-Glu-Ala-Asp) box polypeptide 18
1448389_at	WDR5	1.58263	7.67678	6.36412e-08	2.993e-06	WD repeat domain 5
1450297_at	IL6	-2.11291	7.85981	6.3861e-08	3.0002e-06	interleukin 6
1422488_at	NXT1	1.16365	8.86505	6.40744e-08	3.00709e-06	NTF2-related export protein 1
1453328_at	2700008G24RIK	-1.15746	7.51015	6.42342e-08	3.01146e-06	RIKEN cDNA 2700008G24 gene
1439126_at	1110007A13RIK	1.20334	7.32334	6.44071e-08	3.01643e-06	RIKEN cDNA 1110007A13 gene
1423507_a_at	SIRT2	-1.03203	8.92733	6.45196e-08	3.01649e-06	sirtuin 2 (silent mating type information regulation 2, homolog) 2 (S. cerevisiae)
1450938_at	---	1.14119	8.1377	6.45421e-08	3.01649e-06	---
1419186_a_at	ST8SIA4	-1.12073	10.7603	6.50673e-08	3.03789e-06	ST8 alpha-N-acetyl-neuraminide alpha-2,8-sialyltransferase 4
1420745_a_at	CCNDBP1	-1.16798	9.85515	6.53018e-08	3.04569e-06	cyclin D-type binding-protein 1
1451413_at	CAST	-1.20074	8.69094	6.55196e-08	3.05269e-06	calpastatin
1434482_at	D4ERTD22E	1.21743	7.03975	6.56444e-08	3.05534e-06	DNA segment, Chr 4, ERATO Doi 22, expressed
1424254_at	IFITM1	-1.14996	8.80078	6.58881e-08	3.06353e-06	interferon induced transmembrane protein 1
1456772_at	NCF1	-1.29106	9.95683	6.61603e-08	3.07301e-06	neutrophil cytosolic factor 1
1415704_a_at	CDV3	1.03991	10.4772	6.63473e-08	3.07853e-06	carnitine deficiency-associated gene expressed in ventricle 3
1427539_a_at	ZWINT	-1.22459	9.5425	6.66485e-08	3.08933e-06	ZW10 interactor
1449505_at	---	1.10958	8.92467	6.69198e-08	3.09797e-06	---
1415945_at	MCM5	1.39688	8.97453	6.69724e-08	3.09797e-06	minichromosome maintenance deficient 5, cell division cycle 46 (S. cerevisiae)
1424081_at	PCGF6	1.0389	9.79177	6.70456e-08	3.09818e-06	polycomb group ring finger 6
1422439_a_at	CDK4 /// LOC640611	1.15874	9.2452	6.71424e-08	3.09948e-06	cyclin-dependent kinase 4 /// similar to Cell division protein kinase 4 (Cyclin-dependent kinase 4) (PSK-J3) (CRK3)
1436333_a_at	SYNJ1	-1.07325	9.03348	6.72437e-08	3.10098e-06	synaptojanin 1
1433460_at	TTC7B	1.16642	7.82552	6.73698e-08	3.10362e-06	tetratricopeptide repeat domain 7B
1416031_s_at	MCM7	1.16075	9.91097	6.74464e-08	3.10398e-06	minichromosome maintenance deficient 7 (S. cerevisiae)
1430536_a_at	ERH	1.56304	10.308	6.79437e-08	3.12368e-06	enhancer of rudimentary homolog (Drosophila)
1416177_at	RBMX	1.01932	11.2043	6.81153e-08	3.12838e-06	RNA binding motif protein, X-linked
1422470_at	BNIP3	-1.47409	10.0894	6.82616e-08	3.13191e-06	BCL2/adenovirus E1B interacting protein 1, NIP3
1421821_at	LDLR	1.06846	7.89798	6.84233e-08	3.13491e-06	low density lipoprotein receptor
1433455_at	SH2B3	1.13667	8.47507	6.8466e-08	3.13491e-06	SH2B adaptor protein 3
1425711_a_at	AKT1	1.29949	6.52287	6.85584e-08	3.13596e-06	thymoma viral proto-oncogene 1
1424015_at	RAB6IP1	-1.10293	10.1409	6.8862e-08	3.14597e-06	Rab6 interacting protein 1
1417767_at	CYB5B	1.2203	7.34807	6.89168e-08	3.14597e-06	cytochrome b5 type B
1452215_at	9130401M01RIK	1.04847	8.50105	6.92418e-08	3.15545e-06	RIKEN cDNA 9130401M01 gene
1448531_at	LMNB2 /// LOC671511	1.36955	6.57601	6.93009e-08	3.15545e-06	lamin B2 /// similar to Lamin-B2
1440825_s_at	CCDC28A	-1.10006	9.12733	6.93344e-08	3.15545e-06	coiled-coil domain containing 28A
1428660_s_at	TOR3A	-1.10595	7.00319	6.9509e-08	3.15572e-06	torsin family 3, member A
1452527_a_at	P2RX4	-1.24122	7.72676	6.95321e-08	3.15572e-06	purinergic receptor P2X, ligand-gated ion channel 4
1451201_s_at	RNH1	-1.0127	10.1295	6.96988e-08	3.15572e-06	ribonuclease/angiogenin inhibitor 1
1427736_a_at	CCRL2	-1.59741	7.51278	6.97297e-08	3.15572e-06	chemokine (C-C motif) receptor-like 2
1451793_at	KLHL24	-2.6654	7.24656	6.9804e-08	3.15572e-06	kelch-like 24 (Drosophila)
1448283_a_at	UBLE1B	1.02652	10.5531	6.98275e-08	3.15572e-06	ubiquitin-like 1 (sentrin) activating enzyme E1B
1437089_at	4833409A17RIK	-1.48162	6.77005	6.983e-08	3.15572e-06	RIKEN cDNA 4833409A17 gene
1440195_at	SERBP1	1.42925	6.8639	7.01114e-08	3.16278e-06	Serpine1 mRNA binding protein 1
1426854_a_at	SET	1.1173	12.1763	7.01266e-08	3.16278e-06	SET translocation
1421277_at	SPNA1 /// LOC630963	-1.34853	10.1313	7.04384e-08	3.17367e-06	spectrin alpha 1 /// similar to spectrin alpha 1
1415860_at	KPNA2 /// LOC670551 /// LOC671639	1.00592	11.8164	7.06399e-08	3.17957e-06	karyopherin (importin) alpha 2 /// similar to Importin alpha-2 subunit (Karyopherin alpha-2 subunit) (SRP1-alpha) (RAG cohort protein 1) (Pendulin) (Pore targeting complex 58 kDa subunit) (PTAC58) (Importin alpha P1) /// similar to Importin alpha-2 subunit (Karyopherin alpha-2 subunit) (SRP1-alpha) (RAG cohort protein 1) (Pendulin) (Pore targeting complex 58 kDa subunit) (PTAC58) (Importin alpha …
1448736_a_at	HPRT1	1.05615	10.6576	7.09554e-08	3.18741e-06	hypoxanthine guanine phosphoribosyl transferase 1
1454011_a_at	RPA2	1.31991	8.35287	7.13151e-08	3.20038e-06	replication protein A2
1448127_at	RRM1	1.13781	9.37804	7.14149e-08	3.20167e-06	ribonucleotide reductase M1
1419269_at	DUT	1.31454	6.71408	7.16205e-08	3.20445e-06	deoxyuridine triphosphatase
1451016_at	IFRD2	1.60614	8.26861	7.1739e-08	3.20445e-06	interferon-related developmental regulator 2
1423086_at	NPC1	-1.09409	7.80271	7.18214e-08	3.20445e-06	Niemann Pick type C1
1427439_s_at	PRMT5	1.16479	8.5399	7.18594e-08	3.20445e-06	protein arginine N-methyltransferase 5
1419471_a_at	NUDC	1.16126	8.56368	7.19031e-08	3.20445e-06	nuclear distribution gene C homolog (Aspergillus)
1435233_at	NCOA2	-1.0155	10.239	7.20673e-08	3.2086e-06	nuclear receptor coactivator 2
1439266_a_at	POLR3K	1.01935	9.4315	7.21508e-08	3.20915e-06	polymerase (RNA) III (DNA directed) polypeptide K
1452798_s_at	MAPK1IP1	-1.3212	6.7823	7.23107e-08	3.21309e-06	mitogen activated protein kinase 1 interacting protein 1
1424927_at	GLIPR1	-1.16606	11.0876	7.24401e-08	3.21567e-06	GLI pathogenesis-related 1 (glioma)
1429184_at	GVIN1	-1.2858	4.25795	7.26593e-08	3.22223e-06	GTPase, very large interferon inducible 1
1423646_at	ZDHHC3	1.05875	7.89105	7.27977e-08	3.2252e-06	zinc finger, DHHC domain containing 3
1415993_at	SQLE	1.35756	8.97103	7.30747e-08	3.23429e-06	squalene epoxidase
1448437_a_at	GTPBP2	-1.13181	9.42716	7.32633e-08	3.23783e-06	GTP binding protein 2
1418369_at	PRIM1	1.1667	10.1479	7.33226e-08	3.23783e-06	DNA primase, p49 subunit
1448466_at	CDCA5	1.05458	8.02503	7.337e-08	3.23783e-06	cell division cycle associated 5
1428353_at	FOXK2	1.59076	7.57893	7.34466e-08	3.23804e-06	forkhead box K2
1421033_a_at	TCERG1	1.09706	8.78829	7.36308e-08	3.23976e-06	transcription elongation regulator 1 (CA150)
1435076_at	2310047D13RIK	1.17884	6.39596	7.36812e-08	3.23976e-06	RIKEN cDNA 2310047D13 gene
1424638_at	CDKN1A	-1.08764	9.57119	7.37011e-08	3.23976e-06	cyclin-dependent kinase inhibitor 1A (P21)
1419152_at	2810417H13RIK	1.49966	5.48041	7.40675e-08	3.2522e-06	RIKEN cDNA 2810417H13 gene
1426169_a_at	LAT2	1.22999	7.4554	7.41282e-08	3.2522e-06	linker for activation of T cells family, member 2
1422507_at	CSTB	-1.00479	10.6635	7.46384e-08	3.27025e-06	cystatin B
1423809_at	TCF19	1.22987	9.52311	7.46848e-08	3.27025e-06	transcription factor 19
1436186_at	E2F8	1.19435	9.44907	7.48342e-08	3.27362e-06	E2F transcription factor 8
1429652_at	1190002C06RIK	-1.32662	9.47486	7.49994e-08	3.27732e-06	RIKEN cDNA 1190002C06 gene
1428546_at	SYNCRIP	1.10177	9.69663	7.50643e-08	3.27732e-06	synaptotagmin binding, cytoplasmic RNA interacting protein
1455065_x_at	GNPDA1 /// LOC231914 /// LOC667410	-1.32942	10.6319	7.53408e-08	3.28621e-06	glucosamine-6-phosphate deaminase 1 /// similar to Glucosamine-6-phosphate isomerase (Glucosamine-6-phosphate deaminase) (GNPDA) (GlcN6P deaminase) (Oscillin) /// similar to Glucosamine-6-phosphate isomerase (Glucosamine-6-phosphate deaminase) (GNPDA) (GlcN6P deaminase) (Oscillin)
1417809_at	SLC22A18	-1.35309	6.00497	7.54744e-08	3.28886e-06	solute carrier family 22 (organic cation transporter), member 18
1452540_a_at	HIST1H2BC /// HIST1H2BE /// HIST1H2BL /// HIST1H2BM /// HIST1H2BP /// LOC665596 /// LOC665622 /// LOC671645	-1.2171	9.50099	7.55817e-08	3.29036e-06	histone 1, H2bc /// histone 1, H2be /// histone 1, H2bl /// histone 1, H2bm /// histone 1, H2bp /// similar to Histone H2B F (H2B 291A) /// similar to Histone H2B F (H2B 291A) /// similar to Histone H2B F (H2B 291A)
1434245_a_at	CYBASC3	-1.09283	10.2947	7.5701e-08	3.29237e-06	cytochrome b, ascorbate dependent 3
1424576_s_at	CYP2C44	-1.21555	7.58324	7.597e-08	3.29795e-06	cytochrome P450, family 2, subfamily c, polypeptide 44
1428593_at	1700029F09RIK	1.04489	10.2053	7.61014e-08	3.29795e-06	RIKEN cDNA 1700029F09 gene
1430228_at	DTL	1.43478	8.14722	7.61217e-08	3.29795e-06	denticleless homolog (Drosophila)
1455803_at	SLCO4A1	1.43657	6.41619	7.62716e-08	3.30127e-06	solute carrier organic anion transporter family, member 4a1
1450908_at	EIF4E /// LOC630527	1.1712	10.5246	7.63448e-08	3.30127e-06	eukaryotic translation initiation factor 4E /// hypothetical LOC630527
1448829_at	SMC6	1.04772	8.3213	7.67926e-08	3.31746e-06	structural maintenance of chromosomes 6
1420915_at	STAT1	-1.20961	8.1669	7.73486e-08	3.33612e-06	signal transducer and activator of transcription 1
1419254_at	MTHFD2	1.55615	9.37591	7.73727e-08	3.33612e-06	methylenetetrahydrofolate dehydrogenase (NAD+ dependent), methenyltetrahydrofolate cyclohydrolase
1455951_at	MARS	1.01882	9.94485	7.78743e-08	3.35319e-06	methionine-tRNA synthetase
1426395_s_at	EIF3S1	1.0735	7.84079	7.79826e-08	3.35319e-06	eukaryotic translation initiation factor 3, subunit 1 alpha
1438254_at	1110007A13RIK	1.05115	8.85536	7.80561e-08	3.35319e-06	RIKEN cDNA 1110007A13 gene
1438915_at	6720401G13RIK	-1.03842	5.92483	7.8066e-08	3.35319e-06	RIKEN cDNA 6720401G13 gene
1433635_at	WDR18	1.34703	7.08236	7.9106e-08	3.39464e-06	WD repeat domain 18
1451169_at	NOMO1	1.4922	5.31044	8.00091e-08	3.42895e-06	nodal modulator 1
1429174_at	WDR34	1.23574	7.13839	8.0093e-08	3.42895e-06	WD repeat domain 34
1419879_s_at	TRIM25	-1.03068	11.1543	8.01337e-08	3.42895e-06	tripartite motif protein 25
1454811_a_at	SERINC1	-1.19503	8.99313	8.04003e-08	3.43441e-06	serine incorporator 1
1450976_at	NDRG1	-1.03163	8.66077	8.04136e-08	3.43441e-06	N-myc downstream regulated gene 1
1429061_at	1810063B05RIK	1.46624	8.26427	8.05973e-08	3.439e-06	RIKEN cDNA 1810063B05 gene
1455500_at	D11ERTD759E /// LOC672513	-1.14086	10.0407	8.10032e-08	3.45082e-06	DNA segment, Chr 11, ERATO Doi 759, expressed /// similar to chromosome 17 open reading frame 27
1418135_at	AFF1	-1.1295	8.68329	8.10687e-08	3.45082e-06	AF4/FMR2 family, member 1
1432538_a_at	RFC3	1.19264	8.69915	8.11039e-08	3.45082e-06	replication factor C (activator 1) 3
1428135_a_at	EEF1D	1.00924	7.29594	8.12116e-08	3.45214e-06	eukaryotic translation elongation factor 1 delta (guanine nucleotide exchange protein)
1417351_a_at	SNRPA1	1.4115	10.2084	8.2029e-08	3.48097e-06	small nuclear ribonucleoprotein polypeptide A'
1429502_at	STCH	-1.30652	8.19846	8.2044e-08	3.48097e-06	stress 70 protein chaperone, microsome-associated, human homolog
1448314_at	CDC2A	1.01045	10.1998	8.22582e-08	3.48677e-06	cell division cycle 2 homolog A (S. pombe)
1426541_a_at	ENDOD1	1.40387	8.90236	8.25335e-08	3.49516e-06	endonuclease domain containing 1
1460409_at	CPT1A	-1.16233	10.1993	8.29383e-08	3.50901e-06	carnitine palmitoyltransferase 1a, liver
1416559_at	1500003O22RIK	1.48763	7.71546	8.30204e-08	3.50919e-06	RIKEN cDNA 1500003O22 gene
1434728_at	GRIA3	-1.77367	8.40298	8.31046e-08	3.50946e-06	glutamate receptor, ionotropic, AMPA3 (alpha 3)
1424834_s_at	ITPR2	-1.19916	8.07956	8.33092e-08	3.51192e-06	inositol 1,4,5-triphosphate receptor 2
1438557_x_at	DNPEP	-1.06823	10.1522	8.33186e-08	3.51192e-06	aspartyl aminopeptidase
1460215_at	POLR1A	1.2299	7.5566	8.39999e-08	3.53733e-06	polymerase (RNA) I polypeptide A, 194kDa
1429259_a_at	1810014B01RIK	1.21228	9.37717	8.41795e-08	3.54159e-06	RIKEN cDNA 1810014B01 gene
1452072_at	MYCT1	-1.15121	8.17728	8.44944e-08	3.55152e-06	myc target 1
1418932_at	NFIL3	-1.16413	7.59245	8.46238e-08	3.55365e-06	nuclear factor, interleukin 3, regulated
1417024_at	HARS	1.01424	8.79175	8.50445e-08	3.56799e-06	histidyl-tRNA synthetase
1421934_at	CBX5	1.26182	7.96202	8.54626e-08	3.58032e-06	chromobox homolog 5 (Drosophila HP1a)
1423430_at	MYBBP1A	1.7551	8.52596	8.5497e-08	3.58032e-06	MYB binding protein (P160) 1a
1419666_x_at	NUPR1	-1.52507	6.60717	8.56141e-08	3.58189e-06	nuclear protein 1
1416235_at	LRRC59	1.06974	8.77655	8.58124e-08	3.58686e-06	leucine rich repeat containing 59
1452895_at	FBXO45	1.28967	7.73773	8.63355e-08	3.60539e-06	F-box protein 45
1425216_at	FFAR2	-1.12824	8.80137	8.67277e-08	3.61805e-06	free fatty acid receptor 2
1433996_at	SUV39H2	1.33873	6.39026	8.68537e-08	3.61805e-06	suppressor of variegation 3-9 homolog 2 (Drosophila)
1435247_at	UBE1DC1	-1.00342	8.5174	8.70035e-08	3.61805e-06	ubiquitin-activating enzyme E1-domain containing 1
1449061_a_at	PRIM1	1.13652	9.68334	8.70297e-08	3.61805e-06	DNA primase, p49 subunit
1427997_at	1110007M04RIK	1.80425	9.92519	8.71516e-08	3.61805e-06	RIKEN cDNA 1110007M04 gene
1424782_at	TMEM77	-1.53159	7.60676	8.72781e-08	3.61805e-06	transmembrane protein 77
1448124_at	GUSB	1.08157	9.87726	8.73832e-08	3.61805e-06	glucuronidase, beta
1445695_at	ATXN1	-1.10622	8.03508	8.74089e-08	3.61805e-06	Ataxin 1
1429563_x_at	5031415C07RIK	-1.13317	7.73114	8.77152e-08	3.61805e-06	RIKEN cDNA 5031415C07 gene
1453183_at	1110034A24RIK	1.52961	8.03986	8.77848e-08	3.61805e-06	RIKEN cDNA 1110034A24 gene
1429126_at	2600001M11RIK	1.1774	8.01434	8.78433e-08	3.61805e-06	RIKEN cDNA 2600001M11 gene
1436716_at	PPP1R14B	1.37147	6.57157	8.79162e-08	3.61805e-06	protein phosphatase 1, regulatory (inhibitor) subunit 14B
1422702_at	AZIN1	1.003	9.14499	8.79615e-08	3.61805e-06	antizyme inhibitor 1
1416137_at	ANXA7	-1.16387	7.72575	8.80169e-08	3.61805e-06	annexin A7
1446542_at	ACSS2	-1.86777	6.02546	8.8034e-08	3.61805e-06	acyl-CoA synthetase short-chain family member 2
1428800_a_at	PUS7L	1.23706	9.38599	8.8082e-08	3.61805e-06	pseudouridylate synthase 7 homolog (S. cerevisiae)-like
1426906_at	IFI203	-2.41327	6.99056	8.80826e-08	3.61805e-06	interferon activated gene 203
1457292_at	JOSD3	1.28317	8.87151	8.83902e-08	3.62695e-06	Josephin domain containing 3
1421534_at	DFNA5H	1.1964	8.72486	8.84601e-08	3.62695e-06	deafness, autosomal dominant 5 homolog (human)
1418023_at	NARG1	1.13646	10.4866	8.90309e-08	3.64196e-06	NMDA receptor-regulated gene 1
1422900_at	MGEA5	-1.13386	9.57204	8.90685e-08	3.64196e-06	meningioma expressed antigen 5 (hyaluronidase)
1460180_at	HEXB	-1.02755	9.38006	8.91843e-08	3.64339e-06	hexosaminidase B
1434283_at	ARID5B	-1.45388	8.17816	8.94341e-08	3.65029e-06	AT rich interactive domain 5B (Mrf1 like)
1448498_at	RPS6KA4	1.20992	8.32094	8.95991e-08	3.65372e-06	ribosomal protein S6 kinase, polypeptide 4
1416430_at	CAT	-1.0379	9.78971	8.99558e-08	3.66495e-06	catalase
1423804_a_at	IDI1	1.79906	7.81876	9.00767e-08	3.66656e-06	isopentenyl-diphosphate delta isomerase
1425177_at	SHMT1	1.29624	8.70935	9.02144e-08	3.66841e-06	serine hydroxymethyl transferase 1 (soluble)
1434020_at	PDAP1	1.18344	8.97998	9.02847e-08	3.66841e-06	PDGFA associated protein 1
1436808_x_at	MCM5	1.01778	11.2057	9.05283e-08	3.67499e-06	minichromosome maintenance deficient 5, cell division cycle 46 (S. cerevisiae)
1433706_a_at	PTPLAD1	1.08841	10.1527	9.08339e-08	3.68408e-06	protein tyrosine phosphatase-like A domain containing 1
1416730_at	RCL1	1.07677	8.76334	9.11245e-08	3.69255e-06	RNA terminal phosphate cyclase-like 1
1443816_s_at	BB220380	-1.19752	9.30607	9.1259e-08	3.69468e-06	expressed sequence BB220380
1419058_at	POLR1E	1.33148	6.80397	9.15298e-08	3.70215e-06	polymerase (RNA) I polypeptide E
1455674_at	WDR76	1.16169	6.76257	9.16287e-08	3.70215e-06	WD repeat domain 76
1421820_a_at	NF2	1.00105	8.01516	9.17467e-08	3.70215e-06	neurofibromatosis 2
1425178_s_at	SHMT1	1.41907	8.38436	9.18782e-08	3.70215e-06	serine hydroxymethyl transferase 1 (soluble)
1438510_a_at	HARS	1.12344	10.0101	9.19597e-08	3.70215e-06	histidyl-tRNA synthetase
1451359_at	AYTL2	1.15973	7.94754	9.20184e-08	3.70215e-06	acyltransferase like 2
1428410_at	NAT12	1.24341	9.19884	9.20998e-08	3.70215e-06	N-acetyltransferase 12
1445574_at	---	1.02651	7.15331	9.23577e-08	3.70215e-06	Transcribed locus
1427364_a_at	ODC1 /// LOC639787 /// LOC666231 /// LOC668343 /// LOC670279 /// LOC671154 /// LOC671973 /// LOC673302	1.56528	7.7782	9.23711e-08	3.70215e-06	ornithine decarboxylase, structural 1 /// similar to Ornithine decarboxylase (ODC) /// similar to Ornithine decarboxylase (ODC) /// similar to Ornithine decarboxylase (ODC) /// similar to Ornithine decarboxylase (ODC) /// similar to Ornithine decarboxylase (ODC) /// hypothetical protein LOC671973 /// similar to Ornithine decarboxylase (ODC)
1438198_at	BRI3BP	1.1141	7.3552	9.24099e-08	3.70215e-06	Bri3 binding protein
1416362_a_at	FKBP4	1.02622	8.96976	9.24286e-08	3.70215e-06	FK506 binding protein 4
1423236_at	GALNT1	1.00125	9.99693	9.26607e-08	3.70815e-06	UDP-N-acetyl-alpha-D-galactosamine:polypeptide N-acetylgalactosaminyltransferase 1
1421188_at	CCR2	-1.39686	5.29578	9.30959e-08	3.71924e-06	chemokine (C-C motif) receptor 2
1417886_at	1810009A15RIK	1.17027	9.85213	9.31254e-08	3.71924e-06	RIKEN cDNA 1810009A15 gene
1433827_at	ATP8A1	-1.13765	8.46897	9.31852e-08	3.71924e-06	ATPase, aminophospholipid transporter (APLT), class I, type 8A, member 1
1417144_at	TUBG1	1.32303	7.3479	9.39209e-08	3.74198e-06	tubulin, gamma 1
1434831_a_at	FOXO3A	-1.12529	9.33511	9.41605e-08	3.74822e-06	forkhead box O3a
1454698_at	PTPLAD1	1.14181	9.24593	9.47046e-08	3.76323e-06	protein tyrosine phosphatase-like A domain containing 1
1424685_at	EXOSC4	1.03109	7.76027	9.54156e-08	3.78815e-06	exosome component 4
1420093_s_at	HNRPDL	1.15276	9.66946	9.58882e-08	3.80357e-06	heterogeneous nuclear ribonucleoprotein D-like
1423877_at	CHAF1B	1.37415	7.53749	9.60282e-08	3.80539e-06	chromatin assembly factor 1, subunit B (p60)
1455130_at	SPTY2D1	-1.06937	8.84517	9.61894e-08	3.80539e-06	SPT2, Suppressor of Ty, domain containing 1 (S. cerevisiae)
1427885_at	POLD4	-1.20572	8.15392	9.62642e-08	3.80539e-06	polymerase (DNA-directed), delta 4
1419509_a_at	NAGK	-1.0599	8.54252	9.62717e-08	3.80539e-06	N-acetylglucosamine kinase
1452427_s_at	PTPLAD1	1.2628	6.56452	9.64857e-08	3.80872e-06	protein tyrosine phosphatase-like A domain containing 1
1425627_x_at	GSTM1 /// LOC433943 /// LOC674086	-1.3364	7.29923	9.65488e-08	3.80872e-06	glutathione S-transferase, mu 1 /// similar to Glutathione S-transferase Mu 1 (GST class-mu 1) (Glutathione S-transferase GT8.7) (pmGT10) (GST 1-1) /// similar to Glutathione S-transferase Mu 1 (GST class-mu 1) (Glutathione S-transferase GT8.7) (pmGT10) (GST 1-1)
1423049_a_at	TPM1	1.0398	9.02295	9.66092e-08	3.80872e-06	tropomyosin 1, alpha
1448480_at	NIP7	1.14257	10.0158	9.71663e-08	3.82734e-06	nuclear import 7 homolog (S. cerevisiae)
1427287_s_at	ITPR2	-1.38529	8.67916	9.73134e-08	3.82978e-06	inositol 1,4,5-triphosphate receptor 2
1451262_a_at	JTV1	1.20746	8.52672	9.89054e-08	3.87553e-06	JTV1 gene
1435646_at	IKBKG	-1.31064	8.40573	9.93756e-08	3.89057e-06	inhibitor of kappaB kinase gamma
1417585_at	NUP210	1.51305	8.90545	1.00122e-07	3.90479e-06	nucleoporin 210
1448688_at	PODXL	1.36657	6.7117	1.00262e-07	3.90494e-06	podocalyxin-like
1417177_at	GALK1	1.61077	8.2986	1.0044e-07	3.90516e-06	galactokinase 1
1420572_at	MS4A3	1.2147	6.57592	1.00466e-07	3.90516e-06	membrane-spanning 4-domains, subfamily A, member 3
1429242_at	1110054O05RIK	1.17369	6.94675	1.00527e-07	3.90516e-06	RIKEN cDNA 1110054O05 gene
1452698_at	TSFM	1.00356	8.09814	1.01307e-07	3.9281e-06	Ts translation elongation factor, mitochondrial
1426501_a_at	TIFA	-1.03641	7.43967	1.0139e-07	3.9281e-06	-
1416610_a_at	CLCN3	-1.90863	7.0881	1.01421e-07	3.9281e-06	chloride channel 3
1426124_a_at	CLK1	-1.05687	10.1103	1.01471e-07	3.9281e-06	CDC-like kinase 1
1458888_at	---	-1.18931	5.17978	1.0158e-07	3.9281e-06	CDNA clone IMAGE:5250818
1429364_at	4930579G24RIK	1.248	8.51541	1.01722e-07	3.9281e-06	RIKEN cDNA 4930579G24 gene
1448899_s_at	RAD51AP1	1.09774	8.59055	1.01728e-07	3.9281e-06	RAD51 associated protein 1
1418563_at	SERBP1	1.1146	9.17681	1.01917e-07	3.93204e-06	Serpine1 mRNA binding protein 1
1443794_x_at	NOC4L	1.05259	7.99932	1.02069e-07	3.93452e-06	nucleolar complex associated 4 homolog (S. cerevisiae)
1424128_x_at	AURKB	1.09255	8.72965	1.02369e-07	3.93785e-06	aurora kinase B
1450742_at	BYSL	1.52707	6.59898	1.02387e-07	3.93785e-06	bystin-like
1451956_a_at	OPRS1	1.59634	6.54237	1.02417e-07	3.93785e-06	opioid receptor, sigma 1
1452272_a_at	GFER	1.00591	8.20457	1.02703e-07	3.94547e-06	growth factor, erv1 (S. cerevisiae)-like (augmenter of liver regeneration)
1427342_at	5330408N05RIK	1.22078	7.15834	1.02892e-07	3.94939e-06	RIKEN cDNA 5330408N05 gene
1418448_at	RRAS	-1.49425	6.99278	1.03248e-07	3.9597e-06	Harvey rat sarcoma oncogene, subgroup R
1435394_s_at	RHOC	-1.15862	9.13857	1.03372e-07	3.96106e-06	ras homolog gene family, member C
1417038_at	SEPT9	1.03407	9.30218	1.04122e-07	3.98388e-06	septin 9
1436443_a_at	KDELC1	1.08274	9.64501	1.04183e-07	3.98388e-06	KDEL (Lys-Asp-Glu-Leu) containing 1
1416692_at	COIL	1.03202	8.62529	1.04232e-07	3.98388e-06	coilin
1423727_at	CNIH	1.11139	10.1725	1.04554e-07	3.99279e-06	cornichon homolog (Drosophila)
1420124_s_at	TCTA	-1.4955	7.37386	1.04732e-07	3.99415e-06	T-cell leukemia translocation altered gene
1421015_s_at	POLE3	1.02373	7.86071	1.04847e-07	3.99415e-06	polymerase (DNA directed), epsilon 3 (p17 subunit)
1418565_at	SERBP1	1.33826	6.68866	1.04867e-07	3.99415e-06	Serpine1 mRNA binding protein 1
1452753_at	FOXK2	1.45226	7.53037	1.04986e-07	3.99415e-06	forkhead box K2
1451703_s_at	---	1.00947	10.6689	1.05032e-07	3.99415e-06	---
1451167_at	CCDC101	1.21479	7.63371	1.05331e-07	4.00213e-06	coiled-coil domain containing 101
1428269_a_at	GLT8D1	-1.12395	9.33008	1.05777e-07	4.0119e-06	glycosyltransferase 8 domain containing 1
1434010_at	ALS2CR13	-1.13865	8.5241	1.05855e-07	4.0119e-06	amyotrophic lateral sclerosis 2 (juvenile) chromosome region, candidate 13 (human)
1416928_at	RBM12	1.01382	8.74157	1.0607e-07	4.0126e-06	RNA binding motif protein 12
1434581_at	---	-1.37388	5.11542	1.0614e-07	4.0126e-06	---
1417675_a_at	MDN1	1.24952	8.08559	1.06717e-07	4.03103e-06	midasin homolog (yeast)
1424144_at	CDT1	1.32672	9.33053	1.06832e-07	4.03199e-06	chromatin licensing and DNA replication factor 1
1450138_a_at	SERPINB6A	-1.1273	7.72537	1.06983e-07	4.03431e-06	serine (or cysteine) peptidase inhibitor, clade B, member 6a
1418075_at	ST6GALNAC4	1.43204	7.05755	1.07833e-07	4.06299e-06	ST6 (alpha-N-acetyl-neuraminyl-2,3-beta-galactosyl-1,3)-N-acetylgalactosaminide alpha-2,6-sialyltransferase 4
1425993_a_at	HSP110	-1.16843	10.4486	1.08072e-07	4.06858e-06	heat shock protein 110
1416061_at	TBC1D15	-1.08216	9.86908	1.09031e-07	4.09784e-06	TBC1 domain family, member 15
1453913_a_at	TAP2	-1.37064	8.62454	1.09294e-07	4.1043e-06	transporter 2, ATP-binding cassette, sub-family B (MDR/TAP)
1423289_a_at	1810029B16RIK	1.21946	8.34927	1.09435e-07	4.10488e-06	RIKEN cDNA 1810029B16 gene
1450890_a_at	ABI1	-1.05983	9.87306	1.09491e-07	4.10488e-06	abl-interactor 1
1435368_a_at	PARP1	1.12849	9.02376	1.0984e-07	4.11451e-06	poly (ADP-ribose) polymerase family, member 1
1454658_at	ILVBL	-1.37237	8.01044	1.10163e-07	4.12319e-06	ilvB (bacterial acetolactate synthase)-like
1437381_x_at	GPR172B	1.19625	7.06886	1.10582e-07	4.13276e-06	G protein-coupled receptor 172B
1420411_a_at	PI4K2B	-1.10106	9.31652	1.10602e-07	4.13276e-06	phosphatidylinositol 4-kinase type 2 beta
1453228_at	STX11	-1.24536	7.65784	1.11016e-07	4.141e-06	syntaxin 11
1442192_at	TYMS	1.46304	5.11146	1.11055e-07	4.141e-06	thymidylate synthase
1451427_a_at	EGFL7	1.08052	7.35415	1.11154e-07	4.141e-06	EGF-like domain 7
1436297_a_at	GRINA	-1.28196	10.6758	1.11189e-07	4.141e-06	glutamate receptor, ionotropic, N-methyl D-asparate-associated protein 1 (glutamate binding)
1448007_at	BAZ2B	-1.00237	7.95145	1.11443e-07	4.14701e-06	bromodomain adjacent to zinc finger domain, 2B
1426652_at	MCM3 /// LOC671904	1.45638	9.45079	1.11551e-07	4.14761e-06	minichromosome maintenance deficient 3 (S. cerevisiae) /// similar to DNA replication licensing factor MCM3 (DNA polymerase alpha holoenzyme-associated protein P1) (P1-MCM3)
1434278_at	MTM1	1.53905	9.00221	1.11762e-07	4.15204e-06	X-linked myotubular myopathy gene 1
1446539_at	INPP4B	-1.02772	6.33196	1.12385e-07	4.17173e-06	Inositol polyphosphate-4-phosphatase, type II
1433622_at	GEMIN4	1.5169	6.48552	1.12981e-07	4.18855e-06	gem (nuclear organelle) associated protein 4
1415892_at	SGPL1	-1.0134	8.11048	1.13194e-07	4.19143e-06	sphingosine phosphate lyase 1
1438781_at	E130014J05RIK	-1.15186	8.88279	1.13476e-07	4.19508e-06	RIKEN cDNA E130014J05 gene
1419270_a_at	DUT	1.32605	9.96378	1.13478e-07	4.19508e-06	deoxyuridine triphosphatase
1418226_at	ORC2L	1.38634	8.03817	1.13811e-07	4.20393e-06	origin recognition complex, subunit 2-like (S. cerevisiae)
1442155_at	4632427E13RIK	-1.11426	6.16759	1.14648e-07	4.22457e-06	RIKEN cDNA 4632427E13 gene
1450010_at	HSD17B12	1.08415	10.2569	1.14735e-07	4.22457e-06	hydroxysteroid (17-beta) dehydrogenase 12
1422562_at	RRAD	-1.40379	6.75675	1.14821e-07	4.22457e-06	Ras-related associated with diabetes
1451064_a_at	PSAT1	1.18925	10.7912	1.14838e-07	4.22457e-06	phosphoserine aminotransferase 1
1454690_at	IKBKG	-1.23026	9.21068	1.14968e-07	4.2259e-06	inhibitor of kappaB kinase gamma
1445545_at	TMEM77	-1.39057	6.84931	1.15259e-07	4.22971e-06	Transmembrane protein 77
1454670_at	RERE	-1.16825	9.3195	1.15956e-07	4.25181e-06	arginine glutamic acid dipeptide (RE) repeats
1428288_at	KLF9	-1.1004	9.57062	1.16561e-07	4.26705e-06	Kruppel-like factor 9
1429787_x_at	ZWINT	-1.07198	9.96854	1.17144e-07	4.28494e-06	ZW10 interactor
1417725_a_at	SSSCA1	1.69402	7.12361	1.17288e-07	4.2867e-06	Sjogren's syndrome/scleroderma autoantigen 1 homolog (human)
1416553_at	STRA13	1.04341	8.53174	1.1775e-07	4.29289e-06	stimulated by retinoic acid 13
1421890_at	ST3GAL2	1.11912	7.37484	1.17838e-07	4.29289e-06	ST3 beta-galactoside alpha-2,3-sialyltransferase 2
1434398_at	NKRF	1.37331	8.10957	1.17991e-07	4.29297e-06	NF-kappaB repressing factor
1428823_at	HDDC2	1.21212	8.44928	1.18295e-07	4.29911e-06	HD domain containing 2
1420637_at	PRPS2	1.06349	7.91006	1.18475e-07	4.30185e-06	phosphoribosyl pyrophosphate synthetase 2
1427075_s_at	PCMTD2	-1.87139	7.52539	1.18561e-07	4.30185e-06	protein-L-isoaspartate (D-aspartate) O-methyltransferase domain containing 2
1446255_at	KCNQ1	-1.19749	7.40304	1.19532e-07	4.33015e-06	Potassium voltage-gated channel, subfamily Q, member 1
1423316_at	TMEM39A	-1.28396	8.80482	1.19719e-07	4.33342e-06	transmembrane protein 39a
1448140_at	CIAPIN1	1.06202	7.35405	1.19971e-07	4.33906e-06	cytokine induced apoptosis inhibitor 1
1449886_a_at	TIMM9	1.39314	7.15473	1.20074e-07	4.33929e-06	translocase of inner mitochondrial membrane 9 homolog (yeast)
1434403_at	SPRED2	1.02205	9.29834	1.20426e-07	4.34853e-06	sprouty-related, EVH1 domain containing 2
1460335_at	LYSMD3	-1.14709	7.13775	1.20793e-07	4.35831e-06	LysM, putative peptidoglycan-binding, domain containing 3
1438292_x_at	ADK	1.01183	9.78536	1.21223e-07	4.37032e-06	adenosine kinase
1447936_at	2410006H16RIK	-1.01984	11.5324	1.21526e-07	4.37774e-06	RIKEN cDNA 2410006H16 gene
1423708_a_at	FARSLB	1.03687	8.14422	1.21729e-07	4.38102e-06	phenylalanine-tRNA synthetase-like, beta subunit
1416931_at	NIF3L1	1.12783	7.60234	1.21811e-07	4.38102e-06	Ngg1 interacting factor 3-like 1 (S. pombe)
1426958_at	RPS9 /// LOC272691	1.50934	6.51819	1.22298e-07	4.39357e-06	ribosomal protein S9 /// similar to ribosomal protein S9
1427090_at	ZBED4	1.15038	8.21689	1.22355e-07	4.39357e-06	zinc finger, BED domain containing 4
1428652_at	0610010F05RIK	1.05472	8.56024	1.22621e-07	4.39962e-06	RIKEN cDNA 0610010F05 gene
1456378_s_at	FBXL20	-1.01695	8.74049	1.22881e-07	4.40544e-06	F-box and leucine-rich repeat protein 20
1438011_at	PCYT1A	-1.21642	8.94043	1.24314e-07	4.4533e-06	phosphate cytidylyltransferase 1, choline, alpha isoform
1436677_at	1810032O08RIK	1.37911	7.8584	1.25875e-07	4.48942e-06	RIKEN cDNA 1810032O08 gene
1452446_a_at	2010008E23RIK	-1.01388	9.00061	1.26011e-07	4.48942e-06	RIKEN cDNA 2010008E23 gene
1454976_at	SOD2	1.10787	7.81629	1.2607e-07	4.48942e-06	superoxide dismutase 2, mitochondrial
1426875_s_at	SRXN1	-1.18707	8.23319	1.26334e-07	4.48942e-06	sulfiredoxin 1 homolog (S. cerevisiae)
1450886_at	GSG2	1.05855	8.21299	1.26355e-07	4.48942e-06	germ cell-specific gene 2
1417884_at	SLC16A6	1.17574	9.35528	1.26467e-07	4.48942e-06	solute carrier family 16 (monocarboxylic acid transporters), member 6
1430038_at	GPHN	1.04289	7.74697	1.2664e-07	4.48942e-06	gephyrin
1424348_at	1110007A13RIK	1.00865	9.14347	1.26688e-07	4.48942e-06	RIKEN cDNA 1110007A13 gene
1449121_at	FUSIP1	1.3276	7.97783	1.26705e-07	4.48942e-06	FUS interacting protein (serine-arginine rich) 1
1417949_at	ILF2	1.03708	8.96916	1.26716e-07	4.48942e-06	interleukin enhancer binding factor 2
1420897_at	SNAP23	-1.0977	8.42845	1.26995e-07	4.49222e-06	synaptosomal-associated protein 23
1439093_at	HSPA4L	-1.54674	7.89053	1.27221e-07	4.49672e-06	Heat shock protein 4 like
1420898_at	SNAP23	-1.04803	6.93904	1.274e-07	4.49733e-06	synaptosomal-associated protein 23
1444409_at	KBTBD8	1.22163	7.22153	1.27438e-07	4.49733e-06	Kelch repeat and BTB (POZ) domain containing 8
1436213_a_at	1110028C15RIK	-1.40865	5.5323	1.2773e-07	4.50411e-06	RIKEN cDNA 1110028C15 gene
1460564_at	SUHW2	1.01949	7.24582	1.28077e-07	4.5118e-06	suppressor of hairy wing homolog 2 (Drosophila)
1433559_at	SLC45A4	-1.01132	9.05934	1.28262e-07	4.5118e-06	solute carrier family 45, member 4
1435475_at	LMAN2L	-1.01264	8.89284	1.28281e-07	4.5118e-06	lectin, mannose-binding 2-like
1430403_at	USP32	-1.0443	6.2449	1.28451e-07	4.5118e-06	ubiquitin specific peptidase 32
1422064_a_at	ZBTB20	-1.52285	6.5612	1.28478e-07	4.5118e-06	zinc finger and BTB domain containing 20
1455889_at	MLSTD1	-1.99299	6.77146	1.28553e-07	4.5118e-06	male sterility domain containing 1
1445062_at	ELOVL6	1.00921	5.23409	1.28649e-07	4.5118e-06	ELOVL family member 6, elongation of long chain fatty acids (yeast)
1436042_at	TLN1	1.01304	7.01916	1.2927e-07	4.52523e-06	talin 1
1449734_s_at	BBS4	-1.54862	6.23739	1.29381e-07	4.52523e-06	Bardet-Biedl syndrome 4 homolog (human)
1418003_at	1190002H23RIK	1.3129	6.42218	1.29875e-07	4.53365e-06	RIKEN cDNA 1190002H23 gene
1418968_at	RB1CC1	-1.33818	8.70622	1.30047e-07	4.53581e-06	RB1-inducible coiled-coil 1
1417118_a_at	ARD1A	1.04615	9.15719	1.30635e-07	4.54612e-06	ARD1 homolog A, N-acetyltransferase (S. cerevisiae)
1460711_at	4930461P20RIK	1.13585	8.95522	1.3077e-07	4.54732e-06	RIKEN cDNA 4930461P20 gene
1424538_at	UBL4A	1.00957	8.81262	1.31018e-07	4.55241e-06	ubiquitin-like 4A
1448704_s_at	H47	-1.07875	11.4227	1.31476e-07	4.56483e-06	histocompatibility 47
1440173_x_at	SELP	1.46445	7.24527	1.31858e-07	4.57268e-06	selectin, platelet
1443750_s_at	RPP40	1.10926	7.89931	1.31905e-07	4.57268e-06	ribonuclease P 40 subunit (human)
1417131_at	CDC25A	1.40113	9.01688	1.32007e-07	4.57269e-06	cell division cycle 25 homolog A (S. cerevisiae)
1454955_at	IPO7	1.01136	10.5126	1.3234e-07	4.5807e-06	importin 7
1425173_s_at	GOLPH3L	-1.22876	8.09688	1.32547e-07	4.58435e-06	golgi phosphoprotein 3-like
1437342_x_at	PTTG1IP	-1.10238	8.79289	1.32718e-07	4.58675e-06	pituitary tumor-transforming 1 interacting protein
1443868_at	ATP13A3	1.37685	5.9891	1.33381e-07	4.60291e-06	ATPase type 13A3
1451577_at	ZBTB20	-1.09426	6.64569	1.3357e-07	4.60562e-06	zinc finger and BTB domain containing 20
1424755_at	HIP1	2.01201	7.86575	1.33743e-07	4.60807e-06	huntingtin interacting protein 1
1450403_at	STAT2	-1.20161	5.97493	1.33856e-07	4.60842e-06	signal transducer and activator of transcription 2
1431413_at	9130218E19RIK	-1.50482	7.16539	1.34514e-07	4.62401e-06	RIKEN cDNA 9130218E19 gene
1426804_at	SMARCA4	1.01316	9.3952	1.34788e-07	4.62991e-06	SWI/SNF related, matrix associated, actin dependent regulator of chromatin, subfamily a, member 4
1427410_at	DLEU2	-2.16686	6.25379	1.35305e-07	4.64414e-06	deleted in lymphocytic leukemia, 2
1423863_at	ABCF2	1.03311	7.60215	1.35481e-07	4.64665e-06	ATP-binding cassette, sub-family F (GCN20), member 2
1434183_at	LOC546078 /// LOC666704 /// LOC671345	1.17503	7.89183	1.35775e-07	4.65053e-06	similar to sterile alpha motif domain containing 1 /// similar to sterile alpha motif domain containing 1 /// similar to sterile alpha motif domain containing 1
1416318_at	SERPINB1A	1.27545	7.29856	1.35801e-07	4.65053e-06	serine (or cysteine) peptidase inhibitor, clade B, member 1a
1422884_at	SNRPD3	1.49301	10.4255	1.36031e-07	4.65489e-06	small nuclear ribonucleoprotein D3
1418281_at	RAD51	1.10371	9.30085	1.36654e-07	4.67267e-06	RAD51 homolog (S. cerevisiae)
1451426_at	LGP2	-1.79045	6.51967	1.36934e-07	4.67868e-06	-
1433880_at	DNAJC11	1.14388	7.72728	1.3705e-07	4.67909e-06	DnaJ (Hsp40) homolog, subfamily C, member 11
1449660_s_at	CORO1C	1.07593	8.98996	1.37512e-07	4.69132e-06	coronin, actin binding protein 1C
1454968_at	1110034A24RIK	1.39163	7.39062	1.37733e-07	4.69402e-06	RIKEN cDNA 1110034A24 gene
1434267_at	NEK1	-1.02318	8.24028	1.37972e-07	4.69402e-06	NIMA (never in mitosis gene a)-related expressed kinase 1
1417380_at	IQGAP1	-1.01563	11.6107	1.38075e-07	4.69402e-06	IQ motif containing GTPase activating protein 1
1435768_at	ARID4B	-1.13276	9.39847	1.38112e-07	4.69402e-06	AT rich interactive domain 4B (Rbp1 like)
1427595_at	ACACA /// LOC672245	1.09031	3.86537	1.38237e-07	4.69475e-06	acetyl-Coenzyme A carboxylase alpha /// similar to acetyl-coenzyme A carboxylase alpha
1448657_a_at	DNAJB10	-1.50845	6.12738	1.38986e-07	4.71309e-06	DnaJ (Hsp40) homolog, subfamily B, member 10
1451075_s_at	CTDSP2	-1.05792	9.74022	1.39171e-07	4.71582e-06	CTD (carboxy-terminal domain, RNA polymerase II, polypeptide A) small phosphatase 2
1450847_at	NCBP2	1.04357	7.70414	1.39834e-07	4.72845e-06	nuclear cap binding protein subunit 2
1436922_at	PPIL5	1.69522	5.63404	1.39904e-07	4.72845e-06	peptidylprolyl isomerase (cyclophilin) like 5
1437436_s_at	GRK6	1.01769	9.04244	1.39963e-07	4.72845e-06	G protein-coupled receptor kinase 6
1454817_at	UTP18	1.00328	9.88389	1.40502e-07	4.73601e-06	UTP18, small subunit (SSU) processome component, homolog (yeast)
1455871_s_at	TAX1BP3 /// RPL13	-1.0672	9.19128	1.41067e-07	4.74796e-06	Tax1 (human T-cell leukemia virus type I) binding protein 3 /// ribosomal protein L13
1454943_a_at	PAXIP1	1.16546	6.48223	1.4159e-07	4.75946e-06	PAX interacting (with transcription-activation domain) protein 1
1433692_at	NAT10	1.33735	7.79453	1.4162e-07	4.75946e-06	N-acetyltransferase 10
1423219_a_at	MRPL49	1.06181	8.22517	1.42157e-07	4.77396e-06	mitochondrial ribosomal protein L49
1458802_at	HIVEP3	1.0977	8.15184	1.42263e-07	4.77398e-06	human immunodeficiency virus type I enhancer binding protein 3
1429008_at	1810074P20RIK	-1.03237	8.2749	1.42935e-07	4.79296e-06	RIKEN cDNA 1810074P20 gene
1421251_at	ZFP40	-1.0404	7.21428	1.43523e-07	4.8055e-06	zinc finger protein 40
1428605_at	LOC669879	1.04598	8.55763	1.44111e-07	4.82162e-06	similar to Y73E7A.1
1449483_at	POLK	-1.07507	6.93842	1.44689e-07	4.83401e-06	polymerase (DNA directed), kappa
1428834_at	DUSP4	1.06264	9.01511	1.44814e-07	4.83401e-06	dual specificity phosphatase 4
1416802_a_at	CDCA5	1.06675	9.85094	1.4491e-07	4.83401e-06	cell division cycle associated 5
1448450_at	AK2	1.15968	9.46525	1.45729e-07	4.85056e-06	adenylate kinase 2
1434695_at	DTL	1.14981	9.38296	1.45993e-07	4.85576e-06	denticleless homolog (Drosophila)
1416280_at	UBLE1B	1.00172	10.8438	1.46223e-07	4.85983e-06	ubiquitin-like 1 (sentrin) activating enzyme E1B
1443930_at	BC052046	-1.00266	4.02194	1.46693e-07	4.87109e-06	cDNA sequence BC052046
1423754_at	IFITM3	-1.09899	9.78266	1.46927e-07	4.87248e-06	interferon induced transmembrane protein 3
1431440_at	POLE2	1.34583	5.20298	1.47363e-07	4.88334e-06	polymerase (DNA directed), epsilon 2 (p59 subunit)
1448896_at	PIGF	1.10528	8.67897	1.47869e-07	4.89291e-06	phosphatidylinositol glycan, class F
1419387_s_at	MUC13	-1.59623	7.79595	1.48585e-07	4.913e-06	mucin 13, epithelial transmembrane
1456312_x_at	GSN	-1.3405	9.60134	1.49368e-07	4.93095e-06	gelsolin
1438769_a_at	THYN1	1.16723	8.14562	1.49406e-07	4.93095e-06	thymocyte nuclear protein 1
1436054_at	9130227C08RIK	-1.00805	7.23432	1.49606e-07	4.93095e-06	RIKEN cDNA 9130227C08Rik gene
1422574_at	MXD4	-1.26952	5.90727	1.49608e-07	4.93095e-06	Max dimerization protein 4
1426543_x_at	ENDOD1	1.32894	7.38554	1.49985e-07	4.93396e-06	endonuclease domain containing 1
1420004_s_at	POM121	1.08678	7.82523	1.5089e-07	4.95291e-06	nuclear pore membrane protein 121
1438454_at	B430203M17RIK	-1.05164	9.41652	1.51153e-07	4.95792e-06	RIKEN cDNA B430203M17 gene
1418915_at	MMACHC	1.31957	7.52995	1.51795e-07	4.97537e-06	methylmalonic aciduria cblC type, with homocystinuria
1435080_x_at	5730406M06RIK	-1.06019	10.1873	1.52425e-07	4.99138e-06	RIKEN cDNA 5730406M06 gene
1460672_at	2410002F23RIK	1.36095	8.98237	1.52719e-07	4.99138e-06	RIKEN cDNA 2410002F23 gene
1435630_s_at	ACAT2	1.11933	9.22723	1.52819e-07	4.99138e-06	acetyl-Coenzyme A acetyltransferase 2
1422484_at	CYCS	1.86594	9.8787	1.52837e-07	4.99138e-06	cytochrome c, somatic
1441751_at	AW493563	1.66971	5.57608	1.5359e-07	5.01235e-06	expressed sequence AW493563
1450423_s_at	BXDC1	1.26605	8.52732	1.53733e-07	5.0134e-06	brix domain containing 1
1456865_x_at	RRS1	1.18808	10.43	1.5385e-07	5.01358e-06	RRS1 ribosome biogenesis regulator homolog (S. cerevisiae)
1442201_at	---	-1.41994	7.24284	1.54063e-07	5.01691e-06	Transcribed locus
1447842_x_at	TCN2	-1.15064	9.64576	1.54327e-07	5.02151e-06	Transcobalamin 2
1460026_s_at	ZFYVE27	-1.08305	7.7511	1.54539e-07	5.02151e-06	zinc finger, FYVE domain containing 27
1434744_at	YRDC	1.36468	7.51482	1.54683e-07	5.02174e-06	yrdC domain containing (E.coli)
1427567_a_at	TPM3	1.10743	9.26092	1.54769e-07	5.02174e-06	tropomyosin 3, gamma
1417766_at	CYB5B	1.07887	8.90077	1.55067e-07	5.0278e-06	cytochrome b5 type B
1423815_at	DDX56	1.13	7.9283	1.55311e-07	5.03211e-06	DEAD (Asp-Glu-Ala-Asp) box polypeptide 56
1434832_at	FOXO3A	-1.08257	8.68441	1.55918e-07	5.04814e-06	forkhead box O3a
1449155_at	POLR3G	1.61725	7.14455	1.56149e-07	5.052e-06	polymerase (RNA) III (DNA directed) polypeptide G
1460208_at	FBN1	1.07182	5.49775	1.56674e-07	5.06534e-06	fibrillin 1
1418571_at	TNFRSF12A	1.1594	7.41685	1.57207e-07	5.07166e-06	tumor necrosis factor receptor superfamily, member 12a
1422819_at	MRPL36	1.15272	8.49944	1.57506e-07	5.07713e-06	mitochondrial ribosomal protein L36
1434460_at	BBS4	-1.17805	4.72256	1.57601e-07	5.07713e-06	Bardet-Biedl syndrome 4 homolog (human)
1452844_at	POU6F1	-1.16963	6.1315	1.58075e-07	5.088e-06	POU domain, class 6, transcription factor 1
1424522_at	HEATR1	1.19118	9.19689	1.58406e-07	5.09212e-06	HEAT repeat containing 1
1454743_at	NUP205	1.17065	9.82946	1.5869e-07	5.09528e-06	nucleoporin 205
1425373_a_at	TNFSF5IP1	1.09529	9.54611	1.58775e-07	5.09528e-06	tumor necrosis factor superfamily, member 5-induced protein 1
1423479_at	NOL11	1.04134	8.30733	1.58942e-07	5.09528e-06	nucleolar protein 11
1437986_x_at	FUK	1.01827	7.54624	1.58956e-07	5.09528e-06	fucokinase
1417658_at	TBRG4	1.14902	5.48366	1.59358e-07	5.10094e-06	transforming growth factor beta regulated gene 4
1453067_at	2610040C18RIK	1.55893	7.5234	1.59717e-07	5.10778e-06	RIKEN cDNA 2610040C18 gene
1433808_at	D330001F17RIK	-1.10511	8.4357	1.59799e-07	5.10778e-06	RIKEN cDNA D330001F17 gene
1442245_at	CARM1	-2.2441	5.29975	1.60173e-07	5.11251e-06	coactivator-associated arginine methyltransferase 1
1415838_at	SERINC1	-1.13015	10.7793	1.60548e-07	5.11899e-06	serine incorporator 1
1442510_at	LOC665792 /// LOC669957 /// LOC674416	1.48151	7.41936	1.60716e-07	5.11899e-06	hypothetical protein LOC665792 /// hypothetical protein LOC669957 /// hypothetical protein LOC674416
1434268_at	ADAR	-1.00082	8.7995	1.60757e-07	5.11899e-06	adenosine deaminase, RNA-specific
1434570_at	AK122525	1.41476	7.63937	1.60944e-07	5.11899e-06	cDNA sequence AK122525
1418219_at	IL15	-1.45412	6.8279	1.61481e-07	5.13246e-06	interleukin 15
1449906_at	SELP	1.3817	6.91753	1.61724e-07	5.13569e-06	selectin, platelet
1424545_at	BC003965	1.04603	10.0116	1.62458e-07	5.14176e-06	cDNA sequence BC003965
1450983_at	AKAP8	1.02203	9.19353	1.62578e-07	5.14195e-06	A kinase (PRKA) anchor protein 8
1448809_at	CSE1L	1.16997	10.4097	1.62774e-07	5.14396e-06	chromosome segregation 1-like (S. cerevisiae)
1428672_at	SNRPF	1.03749	9.72775	1.63571e-07	5.16249e-06	small nuclear ribonucleoprotein polypeptide F
1425516_at	OGT	-1.27356	8.04329	1.63773e-07	5.16525e-06	O-linked N-acetylglucosamine (GlcNAc) transferase (UDP-N-acetylglucosamine:polypeptide-N-acetylglucosaminyl transferase)
1418351_a_at	DNMT3B	1.09911	7.10612	1.6391e-07	5.16598e-06	DNA methyltransferase 3B
1446457_at	DDX58	-1.27573	5.45597	1.64257e-07	5.17329e-06	DEAD (Asp-Glu-Ala-Asp) box polypeptide 58
1450986_at	NOL5	1.29232	11.3355	1.64505e-07	5.17748e-06	nucleolar protein 5
1460594_a_at	GMPPA	-1.03721	8.28194	1.65258e-07	5.19395e-06	GDP-mannose pyrophosphorylase A
1452637_a_at	BOLA1	1.00652	8.44756	1.65626e-07	5.19825e-06	bolA-like 1 (E. coli)
1419610_at	CCR1	-1.03532	6.02165	1.67516e-07	5.24048e-06	chemokine (C-C motif) receptor 1
1437874_s_at	HEXB	-1.11726	10.6039	1.67518e-07	5.24048e-06	hexosaminidase B
1433623_at	ZFP367	1.28523	8.96955	1.67552e-07	5.24048e-06	zinc finger protein 367
1460067_at	CCR2	-1.32692	7.1255	1.679e-07	5.24773e-06	chemokine (C-C motif) receptor 2
1418074_at	ST6GALNAC4	1.28186	6.07873	1.68716e-07	5.25824e-06	ST6 (alpha-N-acetyl-neuraminyl-2,3-beta-galactosyl-1,3)-N-acetylgalactosaminide alpha-2,6-sialyltransferase 4
1426971_at	UBE1L	-1.21215	7.24738	1.68753e-07	5.25824e-06	ubiquitin-activating enzyme E1-like
1455437_at	BC033915	-1.01161	8.40249	1.69896e-07	5.28083e-06	cDNA sequence BC033915
1443471_at	ZBTB20	-1.71813	6.53803	1.70015e-07	5.2809e-06	zinc finger and BTB domain containing 20
1451567_a_at	IFI203	-2.71474	4.94077	1.70544e-07	5.29156e-06	interferon activated gene 203
1455456_a_at	TIMM50	1.02085	8.22749	1.70593e-07	5.29156e-06	translocase of inner mitochondrial membrane 50 homolog (yeast)
1458194_at	---	-1.03768	7.77399	1.71472e-07	5.31151e-06	---
1430980_a_at	EIF4A1	1.10099	11.7292	1.71831e-07	5.31534e-06	eukaryotic translation initiation factor 4A1
1427548_a_at	CLNS1A	1.1171	9.36601	1.72372e-07	5.32842e-06	chloride channel, nucleotide-sensitive, 1A
1421208_at	IKBKG	-1.0441	7.33774	1.73308e-07	5.35366e-06	inhibitor of kappaB kinase gamma
1441984_at	CLSPN	1.72296	7.14532	1.73909e-07	5.36184e-06	claspin homolog (Xenopus laevis)
1439128_at	ZBTB20	-1.18732	6.60881	1.74405e-07	5.36184e-06	zinc finger and BTB domain containing 20
1437119_at	ERN1	-1.21092	8.33734	1.74907e-07	5.36267e-06	Endoplasmic reticulum (ER) to nucleus signalling 1
1437136_at	5830436I19RIK	-1.81622	5.89354	1.75193e-07	5.36778e-06	RIKEN cDNA 5830436I19 gene
1455821_x_at	C1QBP	1.11587	12.7803	1.7612e-07	5.38265e-06	complement component 1, q subcomponent binding protein
1417629_at	PRODH /// LOC671160	1.25226	8.66014	1.76129e-07	5.38265e-06	proline dehydrogenase /// similar to Proline oxidase, mitochondrial precursor (Proline dehydrogenase)
1428754_at	3300001M20RIK	1.02389	9.48993	1.76156e-07	5.38265e-06	RIKEN cDNA 3300001M20 gene
1434768_at	TPP1	-1.03064	8.99044	1.77903e-07	5.41982e-06	tripeptidyl peptidase I
1437071_at	EIF1AY	1.27111	6.45656	1.7803e-07	5.41982e-06	eukaryotic translation initiation factor 1A, Y-linked
1430134_a_at	YARS2	1.30391	8.05653	1.78093e-07	5.41982e-06	tyrosyl-tRNA synthetase 2 (mitochondrial)
1434019_at	PDAP1	1.2131	7.12869	1.78625e-07	5.42867e-06	PDGFA associated protein 1
1432188_s_at	NUP43	1.04001	7.88881	1.79118e-07	5.4369e-06	nucleoporin 43
1422785_at	RASA2	1.05283	9.5172	1.79427e-07	5.4369e-06	RAS p21 protein activator 2
1447934_at	9630033F20RIK	1.62772	5.83393	1.79428e-07	5.4369e-06	RIKEN cDNA 9630033F20 gene
1446711_at	A130040G06RIK	-1.56387	5.25818	1.79584e-07	5.4369e-06	RIKEN cDNA A130040G06 gene
1436234_at	4732471D19RIK	1.32874	5.25561	1.79619e-07	5.4369e-06	RIKEN cDNA 4732471D19 gene
1418267_at	MST1	-1.04907	6.84131	1.83208e-07	5.52701e-06	macrophage stimulating 1 (hepatocyte growth factor-like)
1425405_a_at	ADAR	-1.03488	7.16848	1.83974e-07	5.53891e-06	adenosine deaminase, RNA-specific
1438690_at	TYMS	1.42786	7.02927	1.84562e-07	5.53891e-06	Thymidylate synthase
1434714_at	ERO1LB	-1.03477	8.61086	1.84602e-07	5.53891e-06	ERO1-like beta (S. cerevisiae)
1439012_a_at	DCK	1.10438	9.66627	1.84685e-07	5.53891e-06	deoxycytidine kinase
1451649_a_at	WDR75	1.05536	9.85657	1.85039e-07	5.53891e-06	WD repeat domain 75
1450422_a_at	KDELC1	1.38169	7.26424	1.85115e-07	5.53891e-06	KDEL (Lys-Asp-Glu-Leu) containing 1
1416585_at	RUVBL1	1.13031	9.13045	1.85199e-07	5.53891e-06	RuvB-like protein 1
1416319_at	ADK	1.0349	8.51681	1.85531e-07	5.54148e-06	adenosine kinase
1448187_at	POLD1	1.08351	7.42236	1.85871e-07	5.54419e-06	polymerase (DNA directed), delta 1, catalytic subunit
1417499_at	TIMM10	1.05874	10.0848	1.86013e-07	5.54419e-06	translocase of inner mitochondrial membrane 10 homolog (yeast)
1418371_at	DYNLL2	1.08339	9.4436	1.86389e-07	5.54419e-06	dynein light chain LC8-type 2
1431302_a_at	NUDT7	-1.00127	7.92274	1.86391e-07	5.54419e-06	nudix (nucleoside diphosphate linked moiety X)-type motif 7
1422753_a_at	POLR3K	1.05352	8.18571	1.86444e-07	5.54419e-06	polymerase (RNA) III (DNA directed) polypeptide K
1428465_at	TMEM147	1.12092	9.57463	1.86577e-07	5.54419e-06	transmembrane protein 147
1447403_a_at	ZMYND19	1.56288	6.6301	1.86744e-07	5.54419e-06	Zinc finger, MYND domain containing 19
1434809_at	ARHGAP28	-1.2876	6.49465	1.86851e-07	5.54419e-06	Rho GTPase activating protein 28
1424448_at	TRIM6 /// LOC633467	-1.16084	5.15403	1.87187e-07	5.54686e-06	tripartite motif protein 6 /// similar to Tripartite motif protein 6
1424473_at	POLR2H	1.03354	9.1068	1.88138e-07	5.57137e-06	polymerase (RNA) II (DNA directed) polypeptide H
1439452_x_at	DNPEP	-1.04079	10.114	1.90057e-07	5.62081e-06	aspartyl aminopeptidase
1452881_at	4833427B12RIK	1.39377	6.90223	1.91757e-07	5.64391e-06	RIKEN cDNA 4833427B12 gene
1424955_at	CCDC5	1.02106	9.64091	1.92739e-07	5.663e-06	coiled-coil domain containing 5
1429616_at	ZFP91	1.17285	6.9797	1.92998e-07	5.66586e-06	zinc finger protein 91
1456652_at	DTL	1.26019	6.70648	1.93219e-07	5.66586e-06	denticleless homolog (Drosophila)
1421256_at	GZMC	1.09584	8.35118	1.93251e-07	5.66586e-06	granzyme C
1423176_at	TOB1	-1.39553	9.42219	1.93346e-07	5.66586e-06	transducer of ErbB-2.1
1436196_at	C030046G05	-1.12573	8.51625	1.93464e-07	5.66586e-06	hypothetical protein C030046G05
1448267_at	STX5	-1.2665	6.84841	1.94694e-07	5.69449e-06	syntaxin 5
1429106_at	4921509J17RIK	-1.38589	7.38207	1.95019e-07	5.70031e-06	RIKEN cDNA 4921509J17 gene
1432052_at	EXOSC1	1.40329	5.74168	1.95386e-07	5.70733e-06	Exosome component 1
1429499_at	FBXO5	1.00351	9.45662	1.96883e-07	5.7399e-06	F-box only protein 5
1427094_at	POLE2	1.3286	8.69103	1.97501e-07	5.74918e-06	polymerase (DNA directed), epsilon 2 (p59 subunit)
1421933_at	CBX5	1.34034	7.06547	1.97517e-07	5.74918e-06	chromobox homolog 5 (Drosophila HP1a)
1436382_at	ZBTB12	1.28251	6.99891	1.97785e-07	5.74918e-06	zinc finger and BTB domain containing 12
1420773_at	USP36	-1.30746	6.80588	1.97796e-07	5.74918e-06	ubiquitin specific peptidase 36
1423237_at	GALNT1	1.27864	8.91332	1.9784e-07	5.74918e-06	UDP-N-acetyl-alpha-D-galactosamine:polypeptide N-acetylgalactosaminyltransferase 1
1416857_at	SDF2	-1.04746	9.88512	1.98209e-07	5.75251e-06	stromal cell derived factor 2
1426160_a_at	STK16	1.18223	6.96473	1.98695e-07	5.7616e-06	serine/threonine kinase 16
1442082_at	C3AR1	-1.54938	7.10009	1.98777e-07	5.7616e-06	complement component 3a receptor 1
1436150_at	1700066J24RIK	-1.35182	6.13577	1.99473e-07	5.77436e-06	RIKEN cDNA 1700066J24 gene
1416647_at	BCKDHA	-1.06247	7.61723	2.00059e-07	5.7876e-06	branched chain ketoacid dehydrogenase E1, alpha polypeptide
1448212_at	TNFSF5IP1	1.0485	9.49189	2.0078e-07	5.79729e-06	tumor necrosis factor superfamily, member 5-induced protein 1
1454921_at	GM561	1.12179	8.10719	2.01363e-07	5.79929e-06	gene model 561, (NCBI)
1455332_x_at	FCGR2B	-1.39115	6.50687	2.02586e-07	5.82392e-06	Fc receptor, IgG, low affinity IIb
1451183_at	MYOHD1	1.39639	6.64307	2.02606e-07	5.82392e-06	myosin head domain containing 1
1421237_at	TMPO	1.16749	6.54497	2.04003e-07	5.85289e-06	thymopoietin
1434564_at	E2F3	1.22516	8.19085	2.04892e-07	5.87465e-06	E2F transcription factor 3
1436448_a_at	PTGS1	1.08871	9.29055	2.05215e-07	5.88017e-06	prostaglandin-endoperoxide synthase 1
1417632_at	ATP6V0A1	-1.01691	7.89308	2.0543e-07	5.8816e-06	ATPase, H+ transporting, lysosomal V0 subunit A1
1433696_at	D17ERTD441E	1.07747	8.96017	2.05526e-07	5.8816e-06	DNA segment, Chr 17, ERATO Doi 441, expressed
1440378_at	---	-1.00213	7.6372	2.0655e-07	5.90716e-06	---
1424068_at	TCTA	-1.03529	6.33796	2.06814e-07	5.91097e-06	T-cell leukemia translocation altered gene
1452800_a_at	0610008C08RIK /// LOC621156 /// LOC631337	1.1905	9.09329	2.07497e-07	5.92063e-06	RIKEN cDNA 0610008C08 gene /// hypothetical LOC621156 /// hypothetical protein LOC631337
1451161_a_at	EMR1	-1.33583	7.45132	2.08659e-07	5.9377e-06	EGF-like module containing, mucin-like, hormone receptor-like sequence 1
1436136_at	NOC2L	1.09488	8.73961	2.08802e-07	5.9377e-06	nucleolar complex associated 2 homolog (S. cerevisiae)
1430982_at	SFRS1	1.08006	9.99911	2.09588e-07	5.95629e-06	splicing factor, arginine/serine-rich 1 (ASF/SF2)
1417582_s_at	DHODH	1.57133	7.30166	2.1008e-07	5.96651e-06	dihydroorotate dehydrogenase
1417132_at	CDC25A	1.84182	7.53676	2.11781e-07	6.01104e-06	cell division cycle 25 homolog A (S. cerevisiae)
1428633_at	TWISTNB /// LOC627278 /// LOC667501	1.1073	7.08897	2.12729e-07	6.02279e-06	TWIST neighbor /// similar to TWIST neighbor /// similar to TWIST neighbor
1428713_s_at	4833427B12RIK	1.05254	7.84727	2.13482e-07	6.03627e-06	RIKEN cDNA 4833427B12 gene
1459992_x_at	CLN8	-1.18202	6.69263	2.13607e-07	6.03627e-06	ceroid-lipofuscinosis, neuronal 8
1458077_at	BAZ2B	-1.23671	7.06719	2.1393e-07	6.04046e-06	Bromodomain adjacent to zinc finger domain, 2B
1427243_at	AA536743	-1.35325	7.59721	2.14048e-07	6.04046e-06	expressed sequence AA536743
1418869_a_at	PUS1	1.1291	8.43063	2.15536e-07	6.07175e-06	pseudouridine synthase 1
1433820_a_at	1110012D08RIK	-1.02139	6.82546	2.15742e-07	6.07378e-06	RIKEN cDNA 1110012D08 gene
1426576_at	TMEM23	-1.06854	8.21907	2.16387e-07	6.08814e-06	transmembrane protein 23
1438456_at	HM13	-1.45556	7.01111	2.16744e-07	6.09438e-06	histocompatibility (minor) 13
1423138_at	WDR4	1.19916	6.7215	2.17003e-07	6.09598e-06	WD repeat domain 4
1452359_at	AA536743	-1.43943	7.58628	2.18499e-07	6.13226e-06	expressed sequence AA536743
1448414_at	RAD1	1.08376	8.15692	2.19145e-07	6.14655e-06	RAD1 homolog (S. pombe)
1428330_at	DOPEY2	-1.15587	6.48292	2.19876e-07	6.16225e-06	dopey family member 2
1416443_a_at	UBLE1A	1.03707	9.71969	2.19978e-07	6.16225e-06	ubiquitin-like 1 (sentrin) activating enzyme E1A
1442289_at	JOSD3	1.38791	5.47103	2.20608e-07	6.17607e-06	Josephin domain containing 3
1433571_at	SERINC5	-1.28755	7.37166	2.21136e-07	6.17958e-06	serine incorporator 5
1448627_s_at	PBK	1.29942	11.0922	2.21258e-07	6.17958e-06	PDZ binding kinase
1419076_a_at	BRCA2	1.11394	8.50517	2.2126e-07	6.17958e-06	breast cancer 2
1458656_at	AW050198	-1.08804	7.37437	2.21419e-07	6.17958e-06	expressed sequence AW050198
1451164_a_at	MRPS18B	1.03588	8.52964	2.22505e-07	6.20222e-06	mitochondrial ribosomal protein S18B
1455032_at	9630037P07RIK	1.04787	7.62719	2.23102e-07	6.20736e-06	RIKEN cDNA 9630037P07 gene
1433530_at	2210411K19RIK	1.43083	7.92662	2.23365e-07	6.21083e-06	RIKEN cDNA 2210411K19 gene
1417057_a_at	PPID /// LAMP3 /// LOC671770	1.00565	9.93142	2.23812e-07	6.21945e-06	peptidylprolyl isomerase D (cyclophilin D) /// lysosomal-associated membrane protein 3 /// similar to peptidylprolyl isomerase D
1448257_at	SLC29A2	1.01842	5.77059	2.24172e-07	6.22522e-06	solute carrier family 29 (nucleoside transporters), member 2
1416792_at	PPM1G	1.19075	9.5921	2.24296e-07	6.22522e-06	protein phosphatase 1G (formerly 2C), magnesium-dependent, gamma isoform
1426210_x_at	PARP3	-1.34298	6.33928	2.24544e-07	6.22703e-06	poly (ADP-ribose) polymerase family, member 3
1422482_at	RUVBL2	1.15327	8.97748	2.25159e-07	6.23288e-06	RuvB-like protein 2
1422568_at	NDEL1	-1.02715	9.65907	2.25263e-07	6.23288e-06	nuclear distribution gene E-like homolog 1 (A. nidulans)
1454046_x_at	PGS1	1.05709	7.45922	2.26449e-07	6.25095e-06	phosphatidylglycerophosphate synthase 1
1428270_at	GLT8D1	-1.02582	8.7481	2.26471e-07	6.25095e-06	glycosyltransferase 8 domain containing 1
1424786_s_at	WDR45	-1.28568	8.40242	2.27525e-07	6.26854e-06	WD repeat domain 45
1428289_at	KLF9	-1.04014	9.93899	2.28046e-07	6.27905e-06	Kruppel-like factor 9
1437171_x_at	GSN	-1.36952	9.12437	2.28553e-07	6.28919e-06	gelsolin
1418311_at	FN3K	-1.34733	5.13493	2.28879e-07	6.29046e-06	fructosamine 3 kinase
1455612_at	AI848218	-1.14157	6.79441	2.29717e-07	6.30966e-06	expressed sequence AI848218
1423601_s_at	TCOF1	1.30003	7.19336	2.3067e-07	6.31909e-06	Treacher Collins Franceschetti syndrome 1, homolog
1452223_s_at	KIAA1128	-1.16508	6.40596	2.31868e-07	6.34248e-06	KIAA1128
1420549_at	GBP1	-2.43864	6.39192	2.31896e-07	6.34248e-06	guanylate nucleotide binding protein 1
1422135_at	LOC677248	1.07136	5.31166	2.34089e-07	6.39471e-06	similar to zinc finger protein 146
1434289_at	NSUN5	1.01375	7.23236	2.35468e-07	6.42846e-06	NOL1/NOP2/Sun domain family, member 5
1420131_s_at	PTTG1IP	-1.07061	10.1162	2.35749e-07	6.43144e-06	pituitary tumor-transforming 1 interacting protein
1434087_at	MTHFR	-1.23451	7.26754	2.35862e-07	6.43144e-06	5,10-methylenetetrahydrofolate reductase
1457281_at	4930461P20RIK	1.15542	9.42987	2.37262e-07	6.45903e-06	RIKEN cDNA 4930461P20 gene
1430999_a_at	SCOC	1.15283	7.49207	2.37303e-07	6.45903e-06	short coiled-coil protein
1450888_at	NAPB	-1.19207	6.84855	2.37735e-07	6.46294e-06	N-ethylmaleimide sensitive fusion protein attachment protein beta
1428560_at	XPO5	1.13167	7.68752	2.37877e-07	6.46294e-06	exportin 5
1422663_at	ORC1L	1.10714	7.61258	2.38523e-07	6.47659e-06	origin recognition complex, subunit 1-like (S.cereviaiae)
1416083_at	ZFAND5	-1.10963	10.7268	2.39944e-07	6.50733e-06	zinc finger, AN1-type domain 5
1441823_at	RAI17	-1.06413	8.85281	2.41914e-07	6.54502e-06	retinoic acid induced 17
1452662_a_at	EIF2S1	1.01044	11.0987	2.43061e-07	6.55525e-06	eukaryotic translation initiation factor 2, subunit 1 alpha
1447361_at	MTX1	-1.77928	4.45974	2.43164e-07	6.55525e-06	Metaxin 1
1435141_at	SFT2D2	-1.07654	8.74523	2.45271e-07	6.60022e-06	SFT2 domain containing 2
1425517_s_at	OGT	-1.13214	8.34554	2.46554e-07	6.62683e-06	O-linked N-acetylglucosamine (GlcNAc) transferase (UDP-N-acetylglucosamine:polypeptide-N-acetylglucosaminyl transferase)
1452172_at	2810421I24RIK	1.00356	8.55949	2.47167e-07	6.63156e-06	RIKEN cDNA 2810421I24 gene
1449523_at	BCL7C	1.08564	7.93432	2.47762e-07	6.64347e-06	B-cell CLL/lymphoma 7C
1460417_at	AB041803	-1.40356	7.74214	2.48157e-07	6.6492e-06	cDNA sequence AB041803
1434174_at	LYSMD3	-1.31532	7.78055	2.4827e-07	6.6492e-06	LysM, putative peptidoglycan-binding, domain containing 3
1425505_at	MYLK	-1.06254	7.62856	2.48491e-07	6.65114e-06	myosin, light polypeptide kinase
1433719_at	SLC9A9	-1.20345	6.50935	2.49504e-07	6.67133e-06	solute carrier family 9 (sodium/hydrogen exchanger), isoform 9
1453840_at	PABPC1	1.13028	8.61289	2.49692e-07	6.67143e-06	poly A binding protein, cytoplasmic 1
1435634_at	PCMTD1	-1.0176	8.39388	2.52033e-07	6.71629e-06	protein-L-isoaspartate (D-aspartate) O-methyltransferase domain containing 1
1424760_a_at	SMYD2	1.02175	9.91428	2.5268e-07	6.72734e-06	SET and MYND domain containing 2
1425705_a_at	ERO1LB	-1.19305	6.39443	2.53889e-07	6.74466e-06	ERO1-like beta (S. cerevisiae)
1418123_at	UNC119	1.03724	8.5097	2.5397e-07	6.74466e-06	unc-119 homolog (C. elegans)
1448451_at	AK2	1.25358	8.90163	2.56159e-07	6.7959e-06	adenylate kinase 2
1419397_at	POLA1	1.08669	9.3702	2.58712e-07	6.8395e-06	polymerase (DNA directed), alpha 1
1456808_at	4933426M11RIK	-1.29096	7.52697	2.60397e-07	6.87195e-06	RIKEN cDNA 4933426M11 gene
1452646_at	TRP53INP2	-1.05885	6.02041	2.61078e-07	6.88006e-06	tumor protein p53 inducible nuclear protein 2
1438238_at	2010315B03RIK	-1.33323	7.7704	2.62426e-07	6.9053e-06	RIKEN cDNA 2010315B03 gene
1433833_at	FNDC3B	-1.18103	8.59871	2.64493e-07	6.93322e-06	fibronectin type III domain containing 3B
1423785_at	EGLN1	1.00898	8.43942	2.64628e-07	6.93322e-06	EGL nine homolog 1 (C. elegans)
1435319_at	IHPK2	-1.23115	7.6468	2.64837e-07	6.93322e-06	inositol hexaphosphate kinase 2
1421936_at	DAPP1	-1.01204	8.42018	2.65981e-07	6.95824e-06	dual adaptor for phosphotyrosine and 3-phosphoinositides 1
1417827_at	NGLY1	-1.02104	8.83839	2.66911e-07	6.97449e-06	N-glycanase 1
1451821_a_at	SP100	-1.58581	7.0717	2.67853e-07	6.99099e-06	nuclear antigen Sp100
1456055_x_at	POLD1	1.05359	8.73031	2.68685e-07	7.00459e-06	polymerase (DNA directed), delta 1, catalytic subunit
1424643_at	TCOF1	1.17999	7.48852	2.68918e-07	7.00662e-06	Treacher Collins Franceschetti syndrome 1, homolog
1425078_x_at	LOC620078	-1.36756	7.9603	2.69254e-07	7.01134e-06	similar to SP140 nuclear body protein (predicted)
1456341_a_at	KLF9	-1.06906	9.69549	2.71677e-07	7.06626e-06	Kruppel-like factor 9
1440837_at	H2-OB	-2.17838	4.27876	2.72226e-07	7.07647e-06	histocompatibility 2, O region beta locus
1434204_x_at	SHMT2	1.25894	6.51688	2.72621e-07	7.08265e-06	Serine hydroxymethyl transferase 2 (mitochondrial)
1424115_at	PPP5C	1.08386	6.67098	2.72926e-07	7.08434e-06	protein phosphatase 5, catalytic subunit
1452115_a_at	PLK4	1.07871	7.80021	2.73e-07	7.08434e-06	polo-like kinase 4 (Drosophila)
1418764_a_at	BPNT1	1.1231	6.28739	2.74602e-07	7.11269e-06	bisphosphate 3'-nucleotidase 1
1417098_s_at	MECR	1.0189	7.27222	2.74978e-07	7.11269e-06	mitochondrial trans-2-enoyl-CoA reductase
1438882_at	ARHGAP18	-1.09113	7.34537	2.75039e-07	7.11269e-06	Rho GTPase activating protein 18
1443245_at	---	-1.04051	8.88705	2.75274e-07	7.11469e-06	---
1423095_s_at	CRBN	-1.02589	9.18364	2.756e-07	7.11903e-06	cereblon
1442793_s_at	TBRG4	1.07179	8.76403	2.76428e-07	7.13633e-06	transforming growth factor beta regulated gene 4
1435446_a_at	CHPT1	-1.25063	7.03033	2.76602e-07	7.13674e-06	choline phosphotransferase 1
1454666_at	KLF3	-1.80233	4.73774	2.78589e-07	7.17159e-06	Kruppel-like factor 3 (basic)
1441231_at	---	1.22794	6.17994	2.81199e-07	7.21819e-06	PREDICTED: Mus musculus hypothetical protein LOC626097 (LOC626097), mRNA
1443536_at	SLC7A11	-1.23803	7.1484	2.82176e-07	7.23091e-06	solute carrier family 7 (cationic amino acid transporter, y+ system), member 11
1451286_s_at	FUS	1.06601	9.80765	2.83057e-07	7.24143e-06	fusion, derived from t(12;16) malignant liposarcoma (human)
1424143_a_at	CDT1	1.06802	11.3255	2.83706e-07	7.24954e-06	chromatin licensing and DNA replication factor 1
1435240_at	BAZ2B	-1.25964	8.05957	2.84239e-07	7.25857e-06	bromodomain adjacent to zinc finger domain, 2B
1419482_at	C3AR1	-1.29038	6.78817	2.85495e-07	7.28286e-06	complement component 3a receptor 1
1435912_at	UBXD7	-1.25534	7.64656	2.86015e-07	7.28808e-06	UBX domain containing 7
1442074_at	CLEC2G	-1.74332	5.48467	2.86022e-07	7.28808e-06	C-type lectin domain family 2, member g
1423884_at	CIRH1A	1.20881	9.86065	2.86227e-07	7.28834e-06	cirrhosis, autosomal recessive 1A (human)
1439208_at	CHEK1	1.26807	5.86768	2.86356e-07	7.28834e-06	checkpoint kinase 1 homolog (S. pombe)
1451641_at	DBR1	1.12783	8.70333	2.87328e-07	7.30078e-06	debranching enzyme homolog 1 (S. cerevisiae)
1453361_at	HELLS	1.55938	8.6086	2.8733e-07	7.30078e-06	helicase, lymphoid specific
1426581_at	PTPMT1	1.00967	9.01131	2.87573e-07	7.30284e-06	protein tyrosine phosphatase, mitochondrial 1
1434866_x_at	CPT1A	-1.15391	8.78053	2.90484e-07	7.35636e-06	carnitine palmitoyltransferase 1a, liver
1422796_at	PREP	1.15546	7.75037	2.90595e-07	7.35636e-06	prolyl endopeptidase
1428854_at	TMED8	1.05503	9.08399	2.9061e-07	7.35636e-06	transmembrane emp24 domain containing 8
1423675_at	USP1	1.32824	8.56144	2.91231e-07	7.35844e-06	ubiquitin specific peptdiase 1
1434958_at	SACS	1.06429	7.61153	2.92748e-07	7.39263e-06	sacsin
1437247_at	FOSL2 /// LOC634417	-1.30995	8.0764	2.93883e-07	7.41712e-06	fos-like antigen 2 /// similar to fos-like antigen 2
1428788_at	1700012G19RIK	1.1009	8.38594	2.94792e-07	7.42186e-06	RIKEN cDNA 1700012G19 gene
1437114_at	A930001N09RIK	-1.90697	5.15534	2.94814e-07	7.42186e-06	RIKEN cDNA A930001N09 gene
1427929_a_at	PDXK	1.02944	8.94715	2.95094e-07	7.42186e-06	pyridoxal (pyridoxine, vitamin B6) kinase
1449293_a_at	SKP2	2.09993	6.0156	2.95322e-07	7.42186e-06	S-phase kinase-associated protein 2 (p45)
1456150_at	A630082K20RIK	-1.03773	7.29529	2.95387e-07	7.42186e-06	RIKEN cDNA A630082K20 gene
1454305_at	CBX3	1.22901	6.70621	2.95963e-07	7.42807e-06	chromobox homolog 3 (Drosophila HP1 gamma)
1428688_at	PDCD11	1.12517	8.43193	2.96128e-07	7.42808e-06	programmed cell death protein 11
1433902_at	KBTBD8	1.17947	5.57915	2.96582e-07	7.42949e-06	kelch repeat and BTB (POZ) domain containing 8
1426589_at	GAB3	-1.67539	6.28948	2.96641e-07	7.42949e-06	growth factor receptor bound protein 2-associated protein 3
1433745_at	TRIO	-1.13296	7.76886	2.96695e-07	7.42949e-06	triple functional domain (PTPRF interacting)
1421971_a_at	MRPS34	1.05253	9.60734	2.97542e-07	7.42949e-06	mitochondrial ribosomal protein S34
1452098_at	CHTF18	1.10578	5.73037	2.97544e-07	7.42949e-06	CTF18, chromosome transmission fidelity factor 18 homolog (S. cerevisiae)
1427138_at	0610010D24RIK	1.12612	6.63408	2.97674e-07	7.42949e-06	RIKEN cDNA 0610010D24 gene
1431182_at	HSPA8 /// LOC621284 /// LOC624853 /// LOC632214 /// LOC641192 /// LOC666508 /// LOC666904 /// LOC669493 /// LOC671270 /// LOC675417	-1.2302	8.13428	2.97997e-07	7.42949e-06	heat shock protein 8 /// similar to heat shock protein 8 /// similar to heat shock protein 8 /// similar to heat shock protein 8 /// similar to heat shock protein 8 /// similar to heat shock protein 8 /// similar to heat shock protein 8 /// similar to heat shock protein 8 /// similar to heat shock protein 8 /// similar to heat shock protein 8
1456973_at	ARID5B	-1.46549	5.39501	2.98215e-07	7.43082e-06	AT rich interactive domain 5B (Mrf1 like)
1428189_at	5730494M16RIK	1.33833	7.32706	2.98595e-07	7.43619e-06	RIKEN cDNA 5730494M16 gene
1456057_x_at	TMEM109	1.0183	10.6171	2.99465e-07	7.4455e-06	transmembrane protein 109
1417097_at	MECR	1.25198	6.9583	2.99752e-07	7.4455e-06	mitochondrial trans-2-enoyl-CoA reductase
1424609_a_at	LOC432823	-1.11927	9.77443	2.99913e-07	7.4455e-06	similar to hypothetical protein MGC37588
1440188_at	---	-1.55868	5.90293	2.9996e-07	7.4455e-06	---
1421935_at	RPS20 /// LOC245676 /// LOC623568	1.30413	5.42772	3.00841e-07	7.45917e-06	ribosomal protein S20 /// similar to 40S ribosomal protein S20 /// similar to 40S ribosomal protein S20
1417172_at	UBE2L6	-1.09407	5.50506	3.01346e-07	7.46758e-06	ubiquitin-conjugating enzyme E2L 6
1433563_s_at	DERL1	-1.01692	8.41685	3.01662e-07	7.47131e-06	Der1-like domain family, member 1
1440370_at	ABCA13 /// LOC672028	1.02737	4.50247	3.0206e-07	7.47706e-06	ATP-binding cassette, sub-family A (ABC1), member 13 /// similar to ATP binding cassette, sub-family A (ABC1), member 13
1450744_at	ELL2	-1.11781	9.33824	3.02861e-07	7.49277e-06	elongation factor RNA polymerase II 2
AFFX-TransRecMur/X57349_M_at	TFRC	1.17584	6.16622	3.03828e-07	7.50033e-06	transferrin receptor
1436860_at	SENP7	-1.18931	8.42517	3.03998e-07	7.50033e-06	SUMO1/sentrin specific peptidase 7
1450100_a_at	TCERG1	1.34609	8.53365	3.04375e-07	7.50513e-06	transcription elongation regulator 1 (CA150)
1433852_at	C330002I19RIK	-1.10233	10.078	3.05427e-07	7.51915e-06	RIKEN cDNA C330002I19 gene
1455712_at	HIST3H2A	-1.41291	4.6435	3.05812e-07	7.52451e-06	histone 3, H2a
1435379_at	AK122209	1.03369	7.54603	3.06056e-07	7.52523e-06	cDNA sequence AK122209
1436387_at	C330006P03RIK	1.31495	6.93689	3.06362e-07	7.52574e-06	RIKEN cDNA C330006P03 gene
1417125_at	AHCY	1.04215	10.784	3.06748e-07	7.52738e-06	S-adenosylhomocysteine hydrolase
1438443_at	ZBTB20	-1.57592	7.47695	3.06763e-07	7.52738e-06	zinc finger and BTB domain containing 20
1440120_at	GNB2L1	1.02007	7.22606	3.07774e-07	7.54398e-06	Guanine nucleotide binding protein (G protein), beta polypeptide 2 like 1
1454606_at	4933426M11RIK	-1.14962	7.52999	3.08147e-07	7.54902e-06	RIKEN cDNA 4933426M11 gene
1421194_at	ITGA4	-1.23707	6.22109	3.08488e-07	7.55326e-06	integrin alpha 4
1419298_at	PON3	-1.01929	8.57008	3.08974e-07	7.56105e-06	paraoxonase 3
1415750_at	TBL3	1.53656	6.93407	3.09639e-07	7.57323e-06	transducin (beta)-like 3
1435728_at	5230400J09RIK	1.19495	4.93657	3.11169e-07	7.59417e-06	RIKEN cDNA 5230400J09 gene
1429978_at	5830467E07RIK	-1.39942	6.49083	3.12258e-07	7.61251e-06	RIKEN cDNA 5830467E07 gene
1443603_at	PCMTD1	-1.05058	6.0282	3.12648e-07	7.6179e-06	Protein-L-isoaspartate (D-aspartate) O-methyltransferase domain containing 1
1416195_at	RP23-136K12.4	-1.29636	8.76743	3.16318e-07	7.67195e-06	putative phosphatase
1441172_at	AFF3	-1.16338	7.36625	3.1667e-07	7.67444e-06	AF4/FMR2 family, member 3
1455229_x_at	PGS1	1.09023	7.57302	3.20341e-07	7.75091e-06	phosphatidylglycerophosphate synthase 1
1434144_s_at	2410187C16RIK	-1.03827	7.83987	3.20863e-07	7.75937e-06	RIKEN cDNA 2410187C16 gene
1416127_a_at	DNPEP	-1.05079	8.66497	3.21104e-07	7.76105e-06	aspartyl aminopeptidase
1453257_at	AGPAT5	1.10972	10.1163	3.2189e-07	7.77171e-06	1-acylglycerol-3-phosphate O-acyltransferase 5 (lysophosphatidic acid acyltransferase, epsilon)
1447483_s_at	2610002F03RIK	1.49675	7.34441	3.22912e-07	7.77595e-06	RIKEN cDNA 2610002F03 gene
1419743_s_at	CARM1	1.21556	8.52469	3.22928e-07	7.77595e-06	coactivator-associated arginine methyltransferase 1
1426939_at	2310007F12RIK	1.08614	8.34422	3.23199e-07	7.77832e-06	RIKEN cDNA 2310007F12 gene
1427931_s_at	PDXK	1.19344	6.96233	3.23845e-07	7.78973e-06	pyridoxal (pyridoxine, vitamin B6) kinase
1423664_at	QDPR	1.09611	9.31232	3.24729e-07	7.79851e-06	quininoid dihydropteridine reductase
1417353_x_at	SNRPA1	1.48634	9.75855	3.25811e-07	7.82032e-06	small nuclear ribonucleoprotein polypeptide A'
1439741_x_at	UCK2	1.01792	5.91979	3.26552e-07	7.82932e-06	uridine-cytidine kinase 2
1420618_at	CPEB4	-1.06069	9.78021	3.26706e-07	7.82932e-06	cytoplasmic polyadenylation element binding protein 4
1451208_at	ETF1	1.02988	9.59285	3.30911e-07	7.91327e-06	eukaryotic translation termination factor 1
1435139_at	NARG1	1.31637	6.92594	3.30911e-07	7.91327e-06	NMDA receptor-regulated gene 1
1437623_x_at	XRCC3	1.09386	5.52395	3.32153e-07	7.93034e-06	X-ray repair complementing defective repair in Chinese hamster cells 3
1416433_at	RPA2	1.06235	9.48723	3.33605e-07	7.95659e-06	replication protein A2
1440272_at	EIF2S1	1.06676	8.52168	3.34889e-07	7.97574e-06	Eukaryotic translation initiation factor 2, subunit 1 alpha
1423663_at	FLCN	-1.22477	7.88471	3.34948e-07	7.97574e-06	folliculin
1437868_at	BC023892	-1.27124	6.23001	3.35469e-07	7.97574e-06	cDNA sequence BC023892
1451468_s_at	XPO5	1.11789	7.27751	3.36036e-07	7.98223e-06	exportin 5
1445824_at	ZFP458	-1.03877	8.27918	3.36152e-07	7.98223e-06	zinc finger protein 458
1426810_at	JMJD1A	-1.1611	9.79898	3.36509e-07	7.98223e-06	jumonji domain containing 1A
1437676_at	SPAG9	-1.14829	6.48625	3.36867e-07	7.98373e-06	sperm associated antigen 9
1449311_at	BACH1	-1.31326	8.09694	3.38038e-07	8.00289e-06	BTB and CNC homology 1
1440647_at	SIPA1L1	-1.47486	7.52735	3.3828e-07	8.00289e-06	signal-induced proliferation-associated 1 like 1
1424223_at	1700020C11RIK	1.12578	6.92653	3.38379e-07	8.00289e-06	RIKEN cDNA 1700020C11 gene
1451246_s_at	AURKB	1.04965	8.14669	3.38413e-07	8.00289e-06	aurora kinase B
1452059_at	SLC35F5	-1.04622	7.46614	3.38594e-07	8.00289e-06	solute carrier family 35, member F5
1423756_s_at	IGFBP4	1.02805	10.8916	3.40394e-07	8.02934e-06	insulin-like growth factor binding protein 4
1449107_at	NUDT4	1.1199	8.97062	3.40869e-07	8.03635e-06	nudix (nucleoside diphosphate linked moiety X)-type motif 4
1436495_s_at	ZNF260	-1.18684	7.90434	3.4357e-07	8.08313e-06	zinc finger protein 260
1435032_at	GOLGB1	-1.25743	8.30717	3.44568e-07	8.095e-06	golgi autoantigen, golgin subfamily b, macrogolgin 1
1439276_at	ADAR	-1.27309	7.5888	3.44613e-07	8.095e-06	Adenosine deaminase, RNA-specific
1457909_at	DNA2L	1.29339	5.90204	3.46158e-07	8.12283e-06	DNA2 DNA replication helicase 2-like (yeast)
1428458_at	POP1	1.31635	7.19405	3.46762e-07	8.13278e-06	processing of precursor 1, ribonuclease P/MRP family, (S. cerevisiae)
1418279_a_at	AKAP1	1.10399	5.40596	3.46945e-07	8.13284e-06	A kinase (PRKA) anchor protein 1
1416343_a_at	LAMP2	-1.4662	8.78602	3.51053e-07	8.21632e-06	lysosomal membrane glycoprotein 2
1416032_at	TMEM109	1.1961	8.78169	3.51666e-07	8.22213e-06	transmembrane protein 109
1419483_at	C3AR1	-1.41948	7.10589	3.52318e-07	8.22885e-06	complement component 3a receptor 1
1454691_at	NRXN1	-1.08721	8.18079	3.55266e-07	8.27628e-06	neurexin I
1445602_at	A630055G03RIK	1.19769	6.47791	3.56102e-07	8.28291e-06	RIKEN cDNA A630055G03 gene
1459888_at	LOC545261	-1.21947	6.54592	3.58441e-07	8.31313e-06	hypothetical protein LOC545261
1420973_at	ARID5B	-1.46884	7.42842	3.58796e-07	8.31313e-06	AT rich interactive domain 5B (Mrf1 like)
1428354_at	FOXK2	1.09993	7.18718	3.58878e-07	8.31313e-06	forkhead box K2
1415720_s_at	MAD2L1BP	-1.06225	8.01077	3.60107e-07	8.32555e-06	MAD2L1 binding protein
1424500_at	UTP6	1.06972	8.23928	3.60383e-07	8.32555e-06	UTP6, small subunit (SSU) processome component, homolog (yeast)
1427411_s_at	DLEU2	-1.73152	5.58747	3.60711e-07	8.32555e-06	deleted in lymphocytic leukemia, 2
1429395_at	GSTCD	1.13652	8.59008	3.63131e-07	8.36017e-06	glutathione S-transferase, C-terminal domain containing
1434704_at	MLL5	-1.00511	10.3565	3.63485e-07	8.36406e-06	myeloid/lymphoid or mixed-lineage leukemia 5
1427518_at	D10627	1.51831	6.42455	3.64606e-07	8.36849e-06	cDNA sequence D10627
1424766_at	ERCC6L	1.20218	8.65244	3.65417e-07	8.38285e-06	excision repair cross-complementing rodent repair deficiency complementation group 6 - like
1428362_at	E130105L11RIK	1.01399	9.88752	3.69436e-07	8.46213e-06	RIKEN cDNA E130105L11 gene
1443241_at	PUS7	1.07338	6.50901	3.69705e-07	8.464e-06	Pseudouridylate synthase 7 homolog (S. cerevisiae)
1449591_at	CASP4	-1.39895	7.40909	3.71011e-07	8.48097e-06	caspase 4, apoptosis-related cysteine peptidase
1456862_at	SIX4	-1.49352	5.56456	3.75978e-07	8.56414e-06	sine oculis-related homeobox 4 homolog (Drosophila)
1460631_at	OGT	-1.03238	10.251	3.77045e-07	8.57976e-06	O-linked N-acetylglucosamine (GlcNAc) transferase (UDP-N-acetylglucosamine:polypeptide-N-acetylglucosaminyl transferase)
1454975_at	CCDC131	-1.04525	8.91646	3.78261e-07	8.59877e-06	coiled-coil domain containing 131
1434200_at	BC010981	1.02772	7.56922	3.81571e-07	8.65305e-06	cDNA sequence BC010981
1453136_at	FBXO30	-1.00415	6.29157	3.81776e-07	8.65305e-06	F-box protein 30
1455095_at	HIST2H2BE	-1.04379	6.6848	3.818e-07	8.65305e-06	histone 2, H2be
1423303_at	PAXIP1	1.16522	7.44989	3.84716e-07	8.69497e-06	PAX interacting (with transcription-activation domain) protein 1
1448364_at	CCNG2	-1.67966	7.15893	3.84914e-07	8.69497e-06	cyclin G2
1460633_at	PRPF19	1.03953	8.59439	3.84999e-07	8.69497e-06	PRP19/PSO4 pre-mRNA processing factor 19 homolog (S. cerevisiae)
1439568_at	GREB1	-1.06879	4.74001	3.88442e-07	8.75627e-06	gene regulated by estrogen in breast cancer protein
1426573_at	ME2	1.02093	6.63926	3.88548e-07	8.75627e-06	malic enzyme 2, NAD(+)-dependent, mitochondrial
1459561_at	---	1.17497	7.41991	3.88878e-07	8.75627e-06	---
1439292_at	2210408F21RIK	-1.10994	6.72569	3.91253e-07	8.78781e-06	RIKEN cDNA 2210408F21 gene
1423566_a_at	HSP110	-1.21265	9.37879	3.92479e-07	8.80218e-06	heat shock protein 110
1418600_at	KLF1	-1.01535	6.96171	3.93189e-07	8.81373e-06	Kruppel-like factor 1 (erythroid)
1426706_s_at	XYLB	1.04733	7.03744	3.93863e-07	8.82446e-06	xylulokinase homolog (H. influenzae)
1436558_at	JOSD3	1.2069	7.60522	3.95007e-07	8.8457e-06	Josephin domain containing 3
1449390_at	GPATC4	1.18464	6.09934	3.95854e-07	8.86026e-06	G patch domain containing 4
1417430_at	CDR2	1.19119	6.32526	3.96415e-07	8.86401e-06	cerebellar degeneration-related 2
1455294_at	1110029L17RIK	1.11368	7.93165	3.99245e-07	8.91158e-06	RIKEN cDNA 1110029L17 gene
1429678_at	5730508B09RIK	1.10497	7.31176	3.99333e-07	8.91158e-06	RIKEN cDNA 5730508B09 gene
1449791_x_at	9130023D20RIK	-1.33751	5.60714	3.996e-07	8.91313e-06	RIKEN cDNA 9130023D20 gene
1439361_at	MYO9A	-1.00153	4.90262	3.99822e-07	8.91367e-06	Myosin IXa
1434379_at	MXD4	-1.35615	6.95493	4.00298e-07	8.91393e-06	Max dimerization protein 4
1418227_at	ORC2L	1.61748	7.70044	4.00426e-07	8.91393e-06	origin recognition complex, subunit 2-like (S. cerevisiae)
1422441_x_at	CDK4	1.05328	10.1023	4.02145e-07	8.94624e-06	cyclin-dependent kinase 4
1417066_at	CABC1	-1.14235	7.24691	4.03131e-07	8.96088e-06	chaperone, ABC1 activity of bc1 complex like (S. pombe)
1460399_at	BC018601	-1.01033	7.55792	4.03822e-07	8.96738e-06	cDNA sequence BC018601
1418253_a_at	HSPA4L	-1.30921	9.19203	4.04843e-07	8.98564e-06	heat shock protein 4 like
1429900_at	5330406M23RIK	-1.17353	9.08342	4.06428e-07	9.0031e-06	RIKEN cDNA 5330406M23 gene
1416858_a_at	FKBP3	1.32043	10.3002	4.07054e-07	9.01254e-06	FK506 binding protein 3
1426260_a_at	UGT1A2 /// UGT1A6A /// UGT1A10 /// UGT1A7C /// UGT1A5 /// UGT1A9 /// UGT1A6B /// UGT1A1	-1.27593	8.27609	4.0959e-07	9.05241e-06	UDP glucuronosyltransferase 1 family, polypeptide A2 /// UDP glucuronosyltransferase 1 family, polypeptide A6A /// UDP glycosyltransferase 1 family, polypeptide A10 /// UDP glucuronosyltransferase 1 family, polypeptide A7C /// UDP glucuronosyltransferase 1 family, polypeptide A5 /// UDP glucuronosyltransferase 1 family, polypeptide A9 /// UDP glucuronosyltransferase 1 family, polypeptide A6B /// …
1450405_at	MRPL19	1.17397	8.26198	4.09658e-07	9.05241e-06	mitochondrial ribosomal protein L19
1418392_a_at	GBP4	-1.48181	5.99489	4.10311e-07	9.05455e-06	guanylate nucleotide binding protein 4
1458480_at	TOPBP1	1.32271	6.31919	4.11507e-07	9.07102e-06	topoisomerase (DNA) II beta binding protein
1424835_at	GSTM4	-1.02259	7.58824	4.12954e-07	9.0821e-06	glutathione S-transferase, mu 4
1437689_x_at	CLU	-1.20543	8.64524	4.13015e-07	9.0821e-06	clusterin
1434045_at	CDKN1B	-1.12275	10.1334	4.13648e-07	9.09159e-06	cyclin-dependent kinase inhibitor 1B (P27)
1417602_at	PER2	1.04599	5.83315	4.18812e-07	9.18889e-06	period homolog 2 (Drosophila)
1423302_a_at	PAXIP1	1.27634	6.17561	4.22699e-07	9.25893e-06	PAX interacting (with transcription-activation domain) protein 1
1416110_at	SLC35A4	1.04786	8.22683	4.23695e-07	9.26725e-06	solute carrier family 35, member A4
1424058_at	1190002C06RIK	-1.1907	8.20656	4.2922e-07	9.36435e-06	RIKEN cDNA 1190002C06 gene
1424607_a_at	LOC432823	-1.12268	9.71286	4.2938e-07	9.36435e-06	similar to hypothetical protein MGC37588
1450232_at	BIRC4	1.23343	5.28461	4.33034e-07	9.42351e-06	baculoviral IAP repeat-containing 4
1428224_at	HNRPDL	1.24309	7.31482	4.33137e-07	9.42351e-06	heterogeneous nuclear ribonucleoprotein D-like
1423959_at	ROPN1L	-1.01246	5.61748	4.33421e-07	9.42514e-06	ropporin 1-like
1431167_at	DGKG	-1.01058	7.77327	4.34027e-07	9.42921e-06	diacylglycerol kinase, gamma
1419798_at	2610019E17RIK	1.38756	5.52079	4.35668e-07	9.43759e-06	RIKEN cDNA 2610019E17 gene
1438630_x_at	MAT2A	1.18317	10.8882	4.3627e-07	9.4461e-06	methionine adenosyltransferase II, alpha
1451492_at	SLA2	1.18307	7.25911	4.38852e-07	9.48729e-06	Src-like-adaptor 2
1426899_at	TBC1D23	-1.09113	7.93282	4.42874e-07	9.55042e-06	TBC1 domain family, member 23
1455060_at	RP23-336J1.4	1.38311	6.73392	4.43692e-07	9.5609e-06	Ras-GTPase-activating protein SH3-domain binding protein
1435952_at	---	-1.10245	8.79038	4.45754e-07	9.59157e-06	---
1435122_x_at	DNMT1	1.02872	10.2395	4.48769e-07	9.64265e-06	DNA methyltransferase (cytosine-5) 1
1416050_a_at	SCARB1	1.28114	7.50484	4.51299e-07	9.68317e-06	scavenger receptor class B, member 1
1416350_at	KLF16	1.4963	7.0014	4.52423e-07	9.69038e-06	Kruppel-like factor 16
1426572_at	ME2	1.09905	8.09283	4.52465e-07	9.69038e-06	malic enzyme 2, NAD(+)-dependent, mitochondrial
1427540_at	ZWINT	-1.69423	7.99186	4.55022e-07	9.72138e-06	ZW10 interactor
1442135_at	GM237	1.0311	7.85579	4.55315e-07	9.72138e-06	Gene model 237, (NCBI)
1416940_at	PPIF	1.09008	8.51947	4.55451e-07	9.72138e-06	peptidylprolyl isomerase F (cyclophilin F)
1435800_a_at	CSDA	1.14341	11.7506	4.56584e-07	9.73335e-06	cold shock domain protein A
1416756_at	DNAJB1	-1.09049	9.10831	4.5693e-07	9.73453e-06	DnaJ (Hsp40) homolog, subfamily B, member 1
1448413_at	2410016O06RIK	1.12965	8.66329	4.57844e-07	9.7494e-06	RIKEN cDNA 2410016O06 gene
1454607_s_at	PSAT1	1.00746	10.7104	4.59794e-07	9.78169e-06	phosphoserine aminotransferase 1
1428519_at	2610528E23RIK	1.02603	8.88927	4.60205e-07	9.78249e-06	RIKEN cDNA 2610528E23 gene
1435338_at	CDK6	1.03274	10.2656	4.6081e-07	9.78249e-06	cyclin-dependent kinase 6
1443841_x_at	---	-1.37898	5.27405	4.61307e-07	9.78617e-06	---
1423841_at	BXDC2	1.07166	6.68441	4.62041e-07	9.79714e-06	brix domain containing 2
1455740_at	HNRPA1	1.13558	5.74245	4.68838e-07	9.904e-06	heterogeneous nuclear ribonucleoprotein A1
1436247_at	INTS2	1.23284	8.15674	4.70069e-07	9.91746e-06	integrator complex subunit 2
1417976_at	ADA	1.73395	6.62869	4.71305e-07	9.92719e-06	adenosine deaminase
1441788_s_at	BC068171	1.52094	9.04881	4.73644e-07	9.94795e-06	cDNA sequence BC068171
1428744_s_at	BRI3BP	1.00488	9.39378	4.77465e-07	1.00019e-05	Bri3 binding protein
1437088_at	SDAD1	1.07368	8.60714	4.83686e-07	1.01088e-05	SDA1 domain containing 1
1416992_at	MFNG	1.01469	7.92518	4.85045e-07	1.01218e-05	manic fringe homolog (Drosophila)
1430646_at	5830407P18RIK	-1.11799	7.31893	4.8586e-07	1.01307e-05	RIKEN cDNA 5830407P18 gene
1450504_a_at	AGPAT3	1.0505	7.77625	4.86223e-07	1.01336e-05	1-acylglycerol-3-phosphate O-acyltransferase 3
1419205_x_at	GPATC4	1.38735	6.81437	4.88921e-07	1.01711e-05	G patch domain containing 4
1418167_at	TCFAP4	1.29185	6.34725	4.9055e-07	1.01908e-05	transcription factor AP4
1426737_at	GSPT1	1.07601	5.77818	4.93613e-07	1.02219e-05	G1 to S phase transition 1
1449292_at	RB1CC1	-1.17961	8.24683	4.93934e-07	1.02219e-05	RB1-inducible coiled-coil 1
1439672_at	SYNJ1	-1.34031	7.24738	4.94736e-07	1.02307e-05	Synaptojanin 1
1436088_at	0910001A06RIK	1.20992	5.96985	4.95174e-07	1.0235e-05	RIKEN cDNA 0910001A06 gene
1428743_at	BRI3BP	1.16769	7.44576	5.01801e-07	1.03388e-05	Bri3 binding protein
1457113_at	NASP /// D4ERTD767E	1.44733	6.77605	5.06188e-07	1.0415e-05	nuclear autoantigenic sperm protein (histone-binding) /// DNA segment, Chr 4, ERATO Doi 767, expressed
1438413_at	SENP7	-1.07228	7.70294	5.09141e-07	1.04559e-05	SUMO1/sentrin specific peptidase 7
1432143_a_at	HBP1	-1.80765	7.9634	5.10498e-07	1.04702e-05	high mobility group box transcription factor 1
1456145_at	DLEU2	-1.19559	5.22454	5.11811e-07	1.04781e-05	deleted in lymphocytic leukemia, 2
1417728_at	MBD3	1.26088	7.26706	5.1349e-07	1.05029e-05	methyl-CpG binding domain protein 3
1418225_at	ORC2L	1.13908	8.23395	5.13491e-07	1.05029e-05	origin recognition complex, subunit 2-like (S. cerevisiae)
1459923_at	BEX6	1.44064	4.62493	5.14789e-07	1.05199e-05	brain expressed gene 6
1422141_s_at	CSPRS	-2.08985	4.8895	5.17391e-07	1.05635e-05	component of Sp100-rs
1438433_at	WHDC1	-1.27368	7.37554	5.17776e-07	1.05651e-05	WAS protein homology region 2 domain containing 1
1451265_at	2310061I09RIK	1.01772	8.81297	5.17934e-07	1.05651e-05	RIKEN cDNA 2310061I09 gene
1421891_at	ST3GAL2	1.02973	8.67721	5.25615e-07	1.06775e-05	ST3 beta-galactoside alpha-2,3-sialyltransferase 2
1456504_at	ZNF182	-1.30289	7.67393	5.2592e-07	1.06775e-05	zinc finger protein 182
1459133_at	EDEM3	-1.03165	7.15104	5.26475e-07	1.06775e-05	ER degradation enhancer, mannosidase alpha-like 3
1429322_at	EXOSC6	1.21869	6.37415	5.28191e-07	1.07017e-05	Exosome component 6
1438034_at	2410005O16RIK	-1.0043	7.34869	5.28528e-07	1.07037e-05	RIKEN cDNA 2410005O16 gene
1434589_x_at	SURF4	-1.13342	9.18514	5.29168e-07	1.0707e-05	surfeit gene 4
1417939_at	RAD51AP1	1.33893	7.28027	5.29741e-07	1.07104e-05	RAD51 associated protein 1
1441501_at	SERBP1	1.55952	7.11426	5.33631e-07	1.07722e-05	Serpine1 mRNA binding protein 1
1426883_at	AW491445	-1.01003	8.89729	5.34058e-07	1.07722e-05	expressed sequence AW491445
1436334_at	SYNJ1	-1.04268	8.835	5.35146e-07	1.07865e-05	synaptojanin 1
1435464_at	1110003E01RIK	-1.36054	7.52434	5.41187e-07	1.08577e-05	RIKEN cDNA 1110003E01 gene
1420967_at	SLC25A15	1.55361	7.56333	5.43004e-07	1.08893e-05	solute carrier family 25 (mitochondrial carrier ornithine transporter), member 15
1417108_at	KLC4	-1.24056	7.01334	5.4407e-07	1.08913e-05	kinesin light chain 4
1436899_at	2700019D07RIK	-1.02792	8.78929	5.44635e-07	1.08978e-05	RIKEN cDNA 2700019D07 gene
1429537_at	5730406M06RIK	-1.01469	9.34235	5.47383e-07	1.09243e-05	RIKEN cDNA 5730406M06 gene
1455790_at	E2F2	1.25845	5.44601	5.48585e-07	1.0938e-05	E2F transcription factor 2
1448104_at	ALDH6A1	-1.1358	8.0851	5.49401e-07	1.09398e-05	aldehyde dehydrogenase family 6, subfamily A1
1440908_at	D030063E12	1.39347	6.93181	5.50473e-07	1.09466e-05	hypothetical protein D030063E12
1416016_at	TAP1	-1.1506	8.3807	5.50963e-07	1.09515e-05	transporter 1, ATP-binding cassette, sub-family B (MDR/TAP)
1438515_at	ZFP207	-1.17194	7.3655	5.51401e-07	1.09554e-05	zinc finger protein 207
1458526_at	---	1.05029	6.27093	5.5274e-07	1.09723e-05	---
1439638_at	ERBB2IP	-1.01761	8.45727	5.55398e-07	1.10154e-05	Erbb2 interacting protein
AFFX-TransRecMur/X57349_5_at	TFRC	1.69905	5.55457	5.62037e-07	1.11261e-05	transferrin receptor
1435068_at	PIP5K2B	1.05441	7.99838	5.62758e-07	1.11261e-05	phosphatidylinositol-4-phosphate 5-kinase, type II, beta
1417777_at	LTB4DH	-1.19108	9.10693	5.69214e-07	1.12203e-05	leukotriene B4 12-hydroxydehydrogenase
1439451_x_at	GPR172B	1.13146	6.36237	5.71589e-07	1.12475e-05	G protein-coupled receptor 172B
1452797_at	2310010B21RIK	1.12092	8.13632	5.74672e-07	1.12865e-05	RIKEN cDNA 2310010B21 gene
1436755_at	ITIH5	1.07217	6.90196	5.77297e-07	1.13055e-05	inter-alpha (globulin) inhibitor H5
1451085_at	C030006K11RIK	1.08066	6.14118	5.79492e-07	1.13387e-05	RIKEN cDNA C030006K11 gene
1430289_a_at	WDR77	1.12016	6.50939	5.80341e-07	1.13431e-05	WD repeat domain 77
1458972_at	9330112F22RIK	-1.04921	5.67974	5.8043e-07	1.13431e-05	RIKEN cDNA 9330112F22 gene
1444178_at	LOC433237	-1.02563	6.07459	5.87683e-07	1.14295e-05	hypothetical gene supported by AK028012
1424556_at	PYCR1	1.02351	5.58757	5.88779e-07	1.14415e-05	pyrroline-5-carboxylate reductase 1
1449278_at	EIF2AK3	-1.03989	8.94273	5.89321e-07	1.14418e-05	eukaryotic translation initiation factor 2 alpha kinase 3
1439787_at	P2RX7	-1.34468	6.91973	5.90114e-07	1.14423e-05	purinergic receptor P2X, ligand-gated ion channel, 7
1429672_at	5830407E08RIK	-1.10228	7.07212	5.96935e-07	1.15447e-05	RIKEN cDNA 5830407E08 gene
1422191_at	CD200R1	-1.27336	6.50306	5.99257e-07	1.15797e-05	CD200 receptor 1
1435079_at	5730406M06RIK	-1.02141	9.64395	5.99965e-07	1.15808e-05	RIKEN cDNA 5730406M06 gene
1459530_at	HSD17B12	1.21811	5.77329	6.00082e-07	1.15808e-05	Hydroxysteroid (17-beta) dehydrogenase 12
1447213_at	SP100	-1.7592	7.10666	6.02104e-07	1.15851e-05	Nuclear antigen Sp100
1439662_at	HOMER1	1.095	7.14585	6.13393e-07	1.17694e-05	homer homolog 1 (Drosophila)
1440717_at	AA407881	-1.11633	6.74667	6.13589e-07	1.17694e-05	expressed sequence AA407881
1417840_at	1500031L02RIK	-1.04176	8.51682	6.17328e-07	1.18125e-05	RIKEN cDNA 1500031L02 gene
1429509_at	2600001B17RIK	1.23407	6.64495	6.20924e-07	1.18612e-05	RIKEN cDNA 2600001B17 gene
1440099_at	---	-1.20157	5.20762	6.26409e-07	1.19356e-05	0 day neonate cerebellum cDNA, RIKEN full-length enriched library, clone:C230026N07 product:unclassifiable, full insert sequence
1435072_at	ZFYVE1	-1.15508	6.81957	6.30402e-07	1.19763e-05	zinc finger, FYVE domain containing 1
1457293_at	---	-1.3159	6.91893	6.38316e-07	1.2091e-05	---
1456423_at	MBD5	-1.108	6.60273	6.42076e-07	1.21418e-05	methyl-CpG binding domain protein 5
1423597_at	ATP8A1	-1.34206	8.82876	6.43404e-07	1.21572e-05	ATPase, aminophospholipid transporter (APLT), class I, type 8A, member 1
1451170_s_at	NOMO1	1.06507	8.99476	6.43428e-07	1.21572e-05	nodal modulator 1
1425767_a_at	SIX4	-1.15707	6.8482	6.439e-07	1.21575e-05	sine oculis-related homeobox 4 homolog (Drosophila)
1418222_at	2610024G14RIK	1.00652	8.25837	6.46999e-07	1.21889e-05	RIKEN cDNA 2610024G14 gene
1436723_at	CENPI	1.00469	7.92154	6.49508e-07	1.22215e-05	centromere protein I
1423602_at	TRAF1	-1.15062	5.47825	6.49538e-07	1.22215e-05	Tnf receptor-associated factor 1
1456071_a_at	CYCS /// LOC670717 /// LOC672195	1.49987	11.5075	6.50182e-07	1.22268e-05	cytochrome c, somatic /// similar to Cytochrome c, somatic /// similar to Cytochrome c, somatic
1459470_at	RUNX1	-1.58842	6.0228	6.5222e-07	1.22515e-05	Runt related transcription factor 1
1424857_a_at	TRIM34 /// LOC434218	-1.11487	5.47709	6.54067e-07	1.22711e-05	tripartite motif protein 34 /// similar to Tripartite motif protein 34
1449511_a_at	SSBP4	1.25567	7.00699	6.54749e-07	1.22734e-05	single stranded DNA binding protein 4
1420127_s_at	CCPG1	-1.16237	6.71497	6.60216e-07	1.23605e-05	cell cycle progression 1
1433813_at	TMEM48	1.27423	7.80087	6.62173e-07	1.23817e-05	transmembrane protein 48
1417695_a_at	SOAT1	-1.03038	8.32984	6.68871e-07	1.24966e-05	sterol O-acyltransferase 1
1426554_a_at	PGAM1 /// LOC668045 /// LOC672147 /// LOC675179 /// LOC677000	1.01138	10.6826	6.7684e-07	1.26108e-05	phosphoglycerate mutase 1 /// similar to Phosphoglycerate mutase 1 (Phosphoglycerate mutase isozyme B) (PGAM-B) (BPG-dependent PGAM 1) /// similar to Phosphoglycerate mutase 1 (Phosphoglycerate mutase isozyme B) (PGAM-B) (BPG-dependent PGAM 1) /// similar to Phosphoglycerate mutase 1 (Phosphoglycerate mutase isozyme B) (PGAM-B) (BPG-dependent PGAM 1) /// similar to Phosphoglycerate mutase 1 (Phos…
1439586_at	LOC548102	-1.58396	5.10165	6.77219e-07	1.26108e-05	hypothetical LOC548102
1450476_at	CNR2	-1.19396	6.73033	6.77964e-07	1.26194e-05	cannabinoid receptor 2 (macrophage)
1457770_at	SLC39A14	1.8709	6.91844	6.79139e-07	1.2631e-05	solute carrier family 39 (zinc transporter), member 14
1442504_at	D18ERTD653E	-1.09882	5.50271	6.81976e-07	1.26732e-05	DNA segment, Chr 18, ERATO Doi 653, expressed
1454711_at	TRIO	-1.30105	7.02224	6.84176e-07	1.26984e-05	triple functional domain (PTPRF interacting)
1441248_at	---	-1.66589	6.65744	6.85421e-07	1.27162e-05	---
1417995_at	PTPN22	-1.23447	7.68294	6.93076e-07	1.28334e-05	protein tyrosine phosphatase, non-receptor type 22 (lymphoid)
1433487_at	CLCN3	-1.78918	5.96336	6.96426e-07	1.28464e-05	chloride channel 3
1434155_a_at	2310061I04RIK	1.18459	7.58836	6.98312e-07	1.28684e-05	RIKEN cDNA 2310061I04 gene
1437070_at	CDC14B	-1.09916	7.12433	6.98448e-07	1.28684e-05	CDC14 cell division cycle 14 homolog B (S. cerevisiae)
1438686_at	EIF4G1	1.17665	7.65479	7.02149e-07	1.2915e-05	eukaryotic translation initiation factor 4, gamma 1
1423173_at	NAPB	-1.37156	5.82733	7.03117e-07	1.29168e-05	N-ethylmaleimide sensitive fusion protein attachment protein beta
1454551_at	9530034D02RIK	-1.59439	6.33989	7.0348e-07	1.29168e-05	RIKEN cDNA 9530034D02 gene
1417627_a_at	LIMK1	1.82027	5.1651	7.03873e-07	1.29168e-05	LIM-domain containing, protein kinase
1435187_at	TOMM20	1.12425	8.34161	7.07292e-07	1.29699e-05	Translocase of outer mitochondrial membrane 20 homolog (yeast)
1432103_a_at	SH3GL3	1.56068	6.53664	7.09798e-07	1.29974e-05	SH3-domain GRB2-like 3
1429530_a_at	4122402O22RIK	1.1438	5.5106	7.10359e-07	1.29987e-05	RIKEN cDNA 4122402O22 gene
1450435_at	L1CAM	-1.11557	8.2349	7.10734e-07	1.29987e-05	L1 cell adhesion molecule
1437780_at	FANCB	1.21567	6.88848	7.20788e-07	1.31216e-05	Fanconi anemia, complementation group B
1457780_at	STX11	-1.20306	7.04536	7.30053e-07	1.32499e-05	syntaxin 11
1436892_at	SPRED2	1.08063	7.47117	7.36303e-07	1.33312e-05	sprouty-related, EVH1 domain containing 2
1429456_a_at	POLR3E	1.27355	7.33024	7.375e-07	1.33405e-05	polymerase (RNA) III (DNA directed) polypeptide E
1449372_at	DNAJC3	-1.00117	10.4453	7.38844e-07	1.33504e-05	DnaJ (Hsp40) homolog, subfamily C, member 3
1430904_at	ARFGAP3	-1.41305	6.3287	7.42865e-07	1.34069e-05	ADP-ribosylation factor GTPase activating protein 3
1420548_a_at	2310008H09RIK	1.10783	6.57108	7.52017e-07	1.35288e-05	RIKEN cDNA 2310008H09 gene
1434606_at	ERBB3	-1.07048	7.03013	7.61658e-07	1.36859e-05	v-erb-b2 erythroblastic leukemia viral oncogene homolog 3 (avian)
1459475_at	D10ERTD761E	-1.25453	3.73052	7.62136e-07	1.3689e-05	DNA segment, Chr 10, ERATO Doi 761, expressed
1442640_at	SLFN5	-1.56406	6.1561	7.63639e-07	1.36942e-05	Schlafen 5
1449633_s_at	NT5C3L	1.05329	7.89767	7.64533e-07	1.37009e-05	5'-nucleotidase, cytosolic III-like
1431212_a_at	3300001M20RIK	1.11604	7.52528	7.64622e-07	1.37009e-05	RIKEN cDNA 3300001M20 gene
1439125_at	ADD1	-1.13622	6.49728	7.66998e-07	1.37271e-05	Adducin 1 (alpha)
1426423_at	SHMT2	1.27081	8.16923	7.67517e-07	1.3731e-05	serine hydroxymethyl transferase 2 (mitochondrial)
1436434_at	9230110J10	1.1656	6.95414	7.71557e-07	1.37923e-05	hypothetical protein 9230110J10
1424006_at	AARSD1	1.2779	7.90507	7.75824e-07	1.38411e-05	alanyl-tRNA synthetase domain containing 1
1451738_at	OGT	-1.27333	7.03151	7.7864e-07	1.38859e-05	O-linked N-acetylglucosamine (GlcNAc) transferase (UDP-N-acetylglucosamine:polypeptide-N-acetylglucosaminyl transferase)
1459649_at	---	-1.0888	3.49882	7.79888e-07	1.39027e-05	Transcribed locus
1420011_s_at	XBP1	-1.06592	9.27108	7.80887e-07	1.3915e-05	X-box binding protein 1
1425543_s_at	PLEKHA5	-1.14729	8.70503	7.86169e-07	1.3965e-05	pleckstrin homology domain containing, family A member 5
1427143_at	JARID1B	-1.25183	8.60764	7.95544e-07	1.40884e-05	jumonji, AT rich interactive domain 1B (Rbp2 like)
1435540_at	IRGQ	-1.34814	6.37748	8.04537e-07	1.41906e-05	immunity-related GTPase family, Q
1428911_at	TTLL4	1.19719	7.63052	8.05925e-07	1.42096e-05	tubulin tyrosine ligase-like family, member 4
1440125_at	A530054K11RIK	-1.093	7.74323	8.07195e-07	1.42193e-05	RIKEN cDNA A530054K11 gene
1420752_at	DTX3	-1.15072	8.89525	8.0965e-07	1.42397e-05	deltex 3 homolog (Drosophila)
1452477_at	3110057O12RIK	-1.1253	6.39928	8.09845e-07	1.42397e-05	RIKEN cDNA 3110057O12 gene
1434191_at	A530016O06RIK	-1.19352	3.37432	8.14974e-07	1.43076e-05	RIKEN cDNA A530016O06 gene
1428468_at	3110043O21RIK	-1.03387	6.00715	8.17201e-07	1.43411e-05	RIKEN cDNA 3110043O21 gene
1417009_at	C1R	1.4993	6.01954	8.24371e-07	1.44276e-05	complement component 1, r subcomponent
1421055_at	LATS2 /// XPO4	1.04082	7.97057	8.2753e-07	1.44311e-05	large tumor suppressor 2 /// exportin 4
1450033_a_at	STAT1	-1.19512	8.27323	8.27771e-07	1.44311e-05	signal transducer and activator of transcription 1
1427998_at	2600001B17RIK	1.14387	7.67377	8.4427e-07	1.46627e-05	RIKEN cDNA 2600001B17 gene
1454870_x_at	GPR172B	1.39976	6.45035	8.46634e-07	1.46862e-05	G protein-coupled receptor 172B
1430750_at	DHFR	1.33697	6.53103	8.52929e-07	1.47726e-05	dihydrofolate reductase
1451902_at	BC021442	-1.14962	6.62097	8.55816e-07	1.48038e-05	cDNA sequence BC021442
1437867_at	---	-1.86295	4.04196	8.59183e-07	1.48297e-05	2 cells egg cDNA, RIKEN full-length enriched library, clone:B020014N01 product:hypothetical protein, full insert sequence
1424792_at	RPP40	1.4226	7.72348	8.60646e-07	1.48346e-05	ribonuclease P 40 subunit (human)
1440119_at	SIPA1L1	-1.18756	6.68143	8.66185e-07	1.4901e-05	signal-induced proliferation-associated 1 like 1
1417145_at	NFXL1	-1.06879	8.64348	8.66286e-07	1.4901e-05	nuclear transcription factor, X-box binding-like 1
1436780_at	OGT	-1.46134	6.99503	8.71568e-07	1.49684e-05	O-linked N-acetylglucosamine (GlcNAc) transferase (UDP-N-acetylglucosamine:polypeptide-N-acetylglucosaminyl transferase)
1435735_x_at	H47	-1.09223	10.0155	8.74101e-07	1.50011e-05	histocompatibility 47
1457483_at	ARID5B	-2.28064	6.82489	8.75308e-07	1.50125e-05	AT rich interactive domain 5B (Mrf1 like)
1422844_a_at	WDR77	1.12329	9.87519	8.78461e-07	1.50394e-05	WD repeat domain 77
1437179_at	RIF1 /// LOC671598	1.19249	9.24759	8.78667e-07	1.50394e-05	Rap1 interacting factor 1 homolog (yeast) /// similar to Telomere-associated protein RIF1 (Rap1-interacting factor 1 homolog) (mRif1)
1460719_a_at	P2RX1	1.13026	7.08315	8.7981e-07	1.50418e-05	purinergic receptor P2X, ligand-gated ion channel, 1
1458458_at	SLFN5	-2.03159	4.70652	8.84499e-07	1.50934e-05	schlafen 5
1421604_a_at	KLF3	-1.26703	3.61086	8.85922e-07	1.51062e-05	Kruppel-like factor 3 (basic)
1428070_at	SYVN1	-1.01691	7.89487	8.89411e-07	1.51543e-05	synovial apoptosis inhibitor 1, synoviolin
1435819_at	4922503N01RIK	-1.00751	6.4292	8.98269e-07	1.52591e-05	RIKEN cDNA 4922503N01 gene
1441150_x_at	---	-1.71341	6.38728	8.99554e-07	1.52694e-05	Transcribed locus
1419132_at	TLR2	-1.37476	7.56124	9.04584e-07	1.53317e-05	toll-like receptor 2
1428510_at	LPHN1	1.0051	7.84261	9.12267e-07	1.54213e-05	latrophilin 1
1441854_at	POLE	1.59084	3.99319	9.19911e-07	1.55021e-05	Polymerase (DNA directed), epsilon
1457568_at	C230004L04	1.55539	6.07321	9.29038e-07	1.56345e-05	hypothetical protein C230004L04
1428684_at	1500001M20RIK	1.03305	8.36739	9.30318e-07	1.56435e-05	RIKEN cDNA 1500001M20 gene
1455368_at	ZDHHC3	1.27332	7.00393	9.33402e-07	1.56787e-05	zinc finger, DHHC domain containing 3
1438592_at	NEK1	-1.48713	4.82041	9.3771e-07	1.57277e-05	NIMA (never in mitosis gene a)-related expressed kinase 1
1415941_s_at	ZFAND2A	-1.51303	8.58293	9.40473e-07	1.57502e-05	zinc finger, AN1-type domain 2A
1420413_at	SLC7A11	-1.08796	6.81407	9.40978e-07	1.57502e-05	solute carrier family 7 (cationic amino acid transporter, y+ system), member 11
1426936_at	2610305J24RIK /// BC005512 /// LOC215866 /// LOC629242 /// LOC630153 /// LOC630525 /// LOC631386 /// LOC637482 /// LOC641366 /// LOC668904 /// LOC669019 /// LOC669231 /// LOC669436 /// LOC670270 /// LOC670719 /// LOC672061 /// LOC672196 /// LOC672939 /// LOC673876 /// LOC674912 /// LOC674927 /// LOC675168 /// LOC675410 /// LOC675706 /// LOC676247 /// LOC676718 /// LOC677506	-1.0096	8.99972	9.42733e-07	1.57596e-05	RIKEN cDNA 2610305J24 gene /// cDNA sequence BC005512 /// hypothetical protein LOC215866 /// hypothetical protein LOC629242 /// similar to melanoma antigen /// similar to melanoma antigen /// similar to melanoma antigen /// similar to melanoma antigen /// hypothetical ENV polyprotein /// similar to melanoma antigen /// hypothetical protein LOC669019 /// similar to melanoma antigen /// hypothetica…
1444473_at	PCAF	-1.11822	6.73701	9.49726e-07	1.5818e-05	P300/CBP-associated factor
1460566_at	MAP1A	-1.14021	5.98459	9.49761e-07	1.5818e-05	microtubule-associated protein 1A
1435277_x_at	NME1	1.09009	10.7947	9.53296e-07	1.58593e-05	expressed in non-metastatic cells 1, protein
1434235_at	SLC20A2	1.36851	7.52145	9.53857e-07	1.58628e-05	solute carrier family 20, member 2
1435303_at	TAF4B	1.0165	8.16622	9.54353e-07	1.58652e-05	TAF4B RNA polymerase II, TATA box binding protein (TBP)-associated factor
1452783_at	FNDC3B	-1.23194	7.04405	9.54848e-07	1.58676e-05	fibronectin type III domain containing 3B
1452222_at	UTRN	-1.24494	7.82629	9.614e-07	1.5941e-05	utrophin
1460675_at	IGSF8	1.23574	7.58422	9.61743e-07	1.5941e-05	immunoglobulin superfamily, member 8
1459875_x_at	5730494M16RIK	1.23394	6.92913	9.68512e-07	1.60179e-05	RIKEN cDNA 5730494M16 gene
1434126_at	4930402H24RIK	-1.25961	4.99596	9.73144e-07	1.60768e-05	RIKEN cDNA 4930402H24 gene
1457732_at	PCMTD2	-1.46778	5.82256	9.76402e-07	1.61189e-05	Protein-L-isoaspartate (D-aspartate) O-methyltransferase domain containing 2
1437410_at	ALDH2	-1.25603	7.94924	9.77934e-07	1.61382e-05	aldehyde dehydrogenase 2, mitochondrial
1438010_at	D4ERTD429E	1.03407	7.12325	9.86779e-07	1.62663e-05	DNA segment, Chr 4, ERATO Doi 429, expressed
1430307_a_at	MOD1 /// LOC624892 /// LOC677317	-1.13559	6.5662	9.92893e-07	1.63552e-05	malic enzyme, supernatant /// similar to NADP-dependent malic enzyme (NADP-ME) (Malic enzyme 1) /// similar to NADP-dependent malic enzyme (NADP-ME) (Malic enzyme 1)
1428827_at	WHSC1	1.08624	7.90046	9.95605e-07	1.63939e-05	Wolf-Hirschhorn syndrome candidate 1 (human)
1418686_at	OAS1C	-1.09037	6.51171	1.00167e-06	1.64576e-05	2'-5' oligoadenylate synthetase 1C
1456567_x_at	GRN	-1.0238	11.6284	1.01309e-06	1.66151e-05	granulin
1450887_at	RQCD1	1.07762	9.37497	1.01909e-06	1.66832e-05	rcd1 (required for cell differentiation) homolog 1 (S. pombe)
1418331_at	1110031I02RIK	1.00204	7.69428	1.02006e-06	1.66869e-05	RIKEN cDNA 1110031I02 gene
1451941_a_at	FCGR2B	-1.30012	6.50222	1.0234e-06	1.67052e-05	Fc receptor, IgG, low affinity IIb
1445271_at	9230105E10RIK	-1.06701	5.13834	1.02838e-06	1.67561e-05	RIKEN cDNA 9230105E10 gene
1459860_x_at	TRIM2	-1.25662	6.0901	1.0325e-06	1.68112e-05	tripartite motif protein 2
1459742_at	---	-1.75291	4.27226	1.03803e-06	1.68707e-05	15 days embryo brain cDNA, RIKEN full-length enriched library, clone:G630032A08 product:unclassifiable, full insert sequence
1420339_at	0610016J10RIK	1.04936	6.05668	1.04198e-06	1.69013e-05	RIKEN cDNA 0610016J10 gene
1444902_at	FBXL10	-1.01733	5.84588	1.04601e-06	1.69454e-05	F-box and leucine-rich repeat protein 10
1423971_at	THOC3	1.03446	8.45057	1.04807e-06	1.69718e-05	THO complex 3
1458238_at	ARID5B	-1.72689	6.16694	1.05111e-06	1.69976e-05	AT rich interactive domain 5B (Mrf1 like)
1458376_at	B930025B16RIK	-1.12898	8.13836	1.05482e-06	1.70404e-05	RIKEN cDNA B930025B16 gene
1439859_at	9630033F20RIK	1.01058	6.34041	1.06575e-06	1.71742e-05	RIKEN cDNA 9630033F20 gene
1448229_s_at	CCND2	1.44129	9.46225	1.06634e-06	1.71742e-05	cyclin D2
1451449_at	4933407N01RIK	-1.00639	9.4629	1.0666e-06	1.71742e-05	RIKEN cDNA 4933407N01 gene
1425506_at	MYLK	-1.0533	8.54719	1.06768e-06	1.71853e-05	myosin, light polypeptide kinase
1435503_at	KIAA0415	-1.09331	6.77982	1.08534e-06	1.73948e-05	KIAA0415 protein
1450290_at	PDCD1LG2	1.08836	7.79203	1.08571e-06	1.73948e-05	programmed cell death 1 ligand 2
1424197_s_at	FANCE	1.01336	6.18499	1.08712e-06	1.74113e-05	Fanconi anemia, complementation group E
1437165_a_at	PCOLCE	-1.71092	4.97318	1.08924e-06	1.74391e-05	procollagen C-endopeptidase enhancer protein
1447870_x_at	1110002E22RIK	-1.088	5.66748	1.10266e-06	1.76227e-05	RIKEN cDNA 1110002E22 gene
1455862_at	9630054F20RIK	1.14726	5.39327	1.10369e-06	1.76329e-05	RIKEN cDNA 9630054F20 gene
1426548_a_at	ATPBD4	1.0643	8.17265	1.10948e-06	1.76913e-05	ATP binding domain 4
1451987_at	ARRB2	1.00521	9.07431	1.10971e-06	1.76913e-05	arrestin, beta 2
1420816_at	YWHAG	1.00624	4.99775	1.11163e-06	1.77158e-05	3-monooxygenase/tryptophan 5-monooxygenase activation protein, gamma polypeptide
1450332_s_at	FMO5	-1.42815	5.27834	1.11839e-06	1.77935e-05	flavin containing monooxygenase 5
1445995_at	CDC25A	1.33912	5.87508	1.12064e-06	1.78136e-05	cell division cycle 25 homolog A (S. cerevisiae)
1418013_at	NAT8	-1.05881	6.67906	1.1296e-06	1.79136e-05	N-acetyltransferase 8 (camello like)
1459782_x_at	ABCC5	-1.28396	4.60157	1.13187e-06	1.7937e-05	ATP-binding cassette, sub-family C (CFTR/MRP), member 5
1436235_x_at	4732471D19RIK	1.13841	5.01823	1.13686e-06	1.79906e-05	RIKEN cDNA 4732471D19 gene
1425895_a_at	ID1	1.21631	6.87502	1.13725e-06	1.79906e-05	inhibitor of DNA binding 1
1435766_at	PPHLN1	1.05306	6.58957	1.15049e-06	1.81396e-05	periphilin 1
1441178_at	DTWD2	1.10478	5.40265	1.15153e-06	1.81448e-05	DTW domain containing 2
1448108_at	SERINC1	-1.06833	10.3401	1.17036e-06	1.83598e-05	serine incorporator 1
1416049_at	GLDC	-1.56702	5.64527	1.17739e-06	1.84381e-05	glycine decarboxylase
1421643_at	ZFPN1A2	-1.48541	5.55312	1.18541e-06	1.85443e-05	zinc finger protein, subfamily 1A, 2 (Helios)
1419046_at	BRP16	1.20278	7.81733	1.19197e-06	1.86161e-05	brain protein 16
1449668_s_at	A730024A03RIK	-1.10833	10.118	1.19663e-06	1.86486e-05	RIKEN cDNA A730024A03 gene
1436222_at	GAS5	1.30232	8.99958	1.20053e-06	1.8693e-05	growth arrest specific 5
1451338_at	NISCH	-1.0299	7.03292	1.20167e-06	1.87013e-05	nischarin
1446099_at	MTHFD1L	1.0005	5.46362	1.20587e-06	1.87281e-05	Methylenetetrahydrofolate dehydrogenase (NADP+ dependent) 1-like
1442939_at	RIF1 /// LOC671598	1.53003	7.83189	1.20588e-06	1.87281e-05	Rap1 interacting factor 1 homolog (yeast) /// similar to Telomere-associated protein RIF1 (Rap1-interacting factor 1 homolog) (mRif1)
1454983_at	AI465301	-1.04993	8.35355	1.20631e-06	1.87283e-05	expressed sequence AI465301
1444408_at	B130040O20RIK	-1.00708	8.08713	1.2099e-06	1.87711e-05	RIKEN cDNA B130040O20 gene
1441051_at	TRIM27	1.20895	6.54687	1.21361e-06	1.88078e-05	tripartite motif protein 27
1437065_at	ZBTB20	-1.18362	5.8088	1.22691e-06	1.89697e-05	zinc finger and BTB domain containing 20
1424256_at	RDH12	-1.03924	4.59317	1.2304e-06	1.89846e-05	retinol dehydrogenase 12
1457709_a_at	A930005H10RIK	-1.09579	7.83435	1.23169e-06	1.89981e-05	RIKEN cDNA A930005H10 gene
1424785_at	ANGPTL6	-1.11652	7.13352	1.23751e-06	1.90748e-05	angiopoietin-like 6
1417444_at	E2F5	1.13897	5.68137	1.2397e-06	1.90961e-05	E2F transcription factor 5
1453573_at	HIST1H3D	-1.56221	7.66898	1.24027e-06	1.90961e-05	histone1, H3d
1449211_at	BPNT1	1.24274	7.29242	1.24143e-06	1.90961e-05	bisphosphate 3'-nucleotidase 1
1441153_at	UTRN	-1.0659	6.40977	1.24651e-06	1.91611e-05	Utrophin
1429252_at	0610010K14RIK	1.05047	7.44245	1.25408e-06	1.92513e-05	RIKEN cDNA 0610010K14 gene
1438997_at	ERN1	-1.01522	7.29516	1.25893e-06	1.93126e-05	Endoplasmic reticulum (ER) to nucleus signalling 1
1428551_at	2410075D05RIK	1.32619	9.23989	1.26839e-06	1.94247e-05	RIKEN cDNA 2410075D05 gene
1429239_a_at	STARD4	1.04591	7.16301	1.27803e-06	1.95127e-05	StAR-related lipid transfer (START) domain containing 4
1427506_at	PPIL5	1.03249	6.81737	1.28018e-06	1.95257e-05	peptidylprolyl isomerase (cyclophilin) like 5
1444456_at	9030425P06RIK	-1.02361	8.04284	1.28556e-06	1.95944e-05	RIKEN cDNA 9030425P06 gene
1437363_at	HOMER1	1.06492	8.11426	1.2972e-06	1.97452e-05	homer homolog 1 (Drosophila)
1452454_at	SDAD1	1.40582	8.64569	1.29957e-06	1.97679e-05	SDA1 domain containing 1
1420535_a_at	6330412F12RIK	-1.08964	7.01672	1.30243e-06	1.98011e-05	RIKEN cDNA 6330412F12 gene
1420399_at	GFI1B	-1.03992	8.84302	1.30263e-06	1.98011e-05	growth factor independent 1B
1426092_a_at	TRIM34	-1.48211	4.97293	1.30828e-06	1.98736e-05	tripartite motif protein 34
1419682_a_at	TRP53RK /// 2810408M09RIK	1.01424	5.87375	1.31805e-06	1.99971e-05	Trp53 regulating kinase /// RIKEN cDNA 2810408M09 gene
1456773_at	NUPL2	1.05972	5.95236	1.32198e-06	2.00278e-05	nucleoporin like 2
1435906_x_at	GBP2	-1.89005	4.88649	1.34233e-06	2.02408e-05	guanylate nucleotide binding protein 2
1437682_x_at	1110004E09RIK	1.44278	6.91423	1.36086e-06	2.04411e-05	RIKEN cDNA 1110004E09 gene
1432249_a_at	ERCC8	1.081	6.37733	1.36104e-06	2.04411e-05	excision repaiross-complementing rodent repair deficiency, complementation group 8
1429984_at	5730455O13RIK	1.08179	6.73995	1.36209e-06	2.045e-05	RIKEN cDNA 5730455O13 gene
1430643_at	MSH3	1.13196	5.26675	1.36424e-06	2.04565e-05	mutS homolog 3 (E. coli)
1436191_at	ARID4A	-1.40947	7.94451	1.36425e-06	2.04565e-05	AT rich interactive domain 4A (Rbp1 like)
1444003_at	LINCR	-1.73625	8.41419	1.36518e-06	2.04623e-05	lung-inducible neuralized-related C3HC4 RING domain protein
1456449_at	SUPT16H	1.15943	6.41775	1.37228e-06	2.05346e-05	Suppressor of Ty 16 homolog (S. cerevisiae)
1419898_s_at	ZC3H7A	-1.13693	8.72594	1.38045e-06	2.06363e-05	zinc finger CCCH type containing 7 A
1440587_at	---	-1.57374	7.15861	1.38918e-06	2.07051e-05	---
1456607_at	VCPIP1	-1.12356	7.79193	1.39327e-06	2.07434e-05	valosin containing protein (p97)/p47 complex interacting protein 1
1441850_x_at	TCN2	-1.04691	7.86304	1.39807e-06	2.07677e-05	transcobalamin 2
1416684_at	FBL	1.22882	10.3486	1.39829e-06	2.07677e-05	fibrillarin
1438511_a_at	1190002H23RIK	1.41657	5.06347	1.40195e-06	2.08129e-05	RIKEN cDNA 1190002H23 gene
1460389_at	CDK8	1.02029	9.86217	1.41899e-06	2.0983e-05	cyclin-dependent kinase 8
1418526_at	FUSIP1	1.03632	8.6399	1.42143e-06	2.09914e-05	FUS interacting protein (serine-arginine rich) 1
1421054_at	XPO4	1.13319	6.87646	1.43318e-06	2.1154e-05	exportin 4
1454639_x_at	RPL41 /// 2210411K19RIK	1.19974	8.74323	1.43424e-06	2.11598e-05	ribosomal protein L41 /// RIKEN cDNA 2210411K19 gene
1436887_x_at	GRWD1	1.30179	5.53405	1.47804e-06	2.1648e-05	glutamate-rich WD repeat containing 1
[truncated: 355 more rows]
